# Supplementary material for: Direct annulation between glycine derivatives and thiiranes through photoredox/iron cooperative catalysis
Source: Royal Society of Chemistry journal article supplement (doi:10.1039/d3cc04580c), 2023-01-01

# Electronic Supplementary Information

## **Direct annulation between glycine derivatives and thiiranes through photoredox/iron cooperative catalysis**

Shutao Wang,<sup>a</sup> Yuan Gao,<sup>a</sup> Yansong Hu,<sup>a</sup> Jintao Zhou,<sup>a</sup> Zhidang Chen,<sup>a</sup> Zhao Liu<sup>b</sup> and Yuan Zhang<sup>\*a</sup>

<sup>a</sup> State Key Laboratory of Applied Organic Chemistry, College of Chemistry and Chemical Engineering, Lanzhou University, 222 Tianshui South Road, Lanzhou 730000, P. R. China

<sup>b</sup> First Hospital of Lanzhou University

\*E-mail: zhangyuan@lzu.edu.cn

## **Table of Contents**

|                                                                       |            |
|-----------------------------------------------------------------------|------------|
| <b>1. Experiment Information .....</b>                                | <b>S2</b>  |
| <b>2. Optimization of Reaction Conditions.....</b>                    | <b>S8</b>  |
| <b>3. Mechanistic Investigation.....</b>                              | <b>S13</b> |
| <b>4. Computational Study.....</b>                                    | <b>S18</b> |
| <b>5. X-ray Crystal Structure for Compound 3m and 8a .....</b>        | <b>S23</b> |
| <b>6. Product Data.....</b>                                           | <b>S25</b> |
| <b>7. References.....</b>                                             | <b>S49</b> |
| <b>8. Copies of <sup>1</sup>H and <sup>13</sup>C NMR Spectra.....</b> | <b>S50</b> |

## 1. Experiment Information

### 1.1 General information

Unless otherwise noted, all reagents were purchased from commercial sources and used as received without further purification. *N*-arylglycine derivatives<sup>1</sup> and thiirane derivatives<sup>2</sup> were prepared according to literature procedures. Unless otherwise indicated, all experiments were carried out under air atmosphere. Irradiation of photochemical reactions was carried out using 18 W blue LED bulb or 5 W LED waveband light source. The LED bulb was purchased from Taobao store (Tai Di lighting, model number: YFGS-9). The silica gel (200–300 meshes) was used for column chromatography and TLC inspections were taken on silica gel GF254 plates. Liquid <sup>1</sup>H and <sup>13</sup>C NMR spectra were recorded on a Bruker Avance III 400 MHz spectrometer. High resolution mass spectra (HRMS) were obtained on a mass spectrometer by using electrospray ionization (ESI) analyzed by quadrupole time-of-flight (QTof).

### 1.2 General procedure for the visible-light-induced aerobic oxidative [2 + 3] cycloaddition between glycine derivatives and thiiranes.

To a solution of *N*-arylglycine derivative (0.2 mmol, 1 eq) and Rh-6G (2 mol%) in dry DCE/CH<sub>3</sub>CN (25/1, 2 mL) was added FeSO<sub>4</sub>·7H<sub>2</sub>O (20 mol%). The mixed solution was irradiated with 18 W blue LEDs under air atmosphere at room temperature, until the glycine derivatives were gone (monitored by TLC), then **2** (0.15 mmol, 1.5 eq) and HI (0.03 mmol, 15 mol%) were added and stirred at room temperature (without the irradiation of blue LEDs). After completion of the reaction as monitored by TLC, the solvent was removed under vacuo, and the residue was purified by silica gel column chromatography (with PE/EA = 64/1 to 16/1 as eluent) to afford the products.

### 1.3 General procedure for the visible-light-induced aerobic oxidative [2 + 3] cycloaddition between glycine derived peptides and thiiranes.

To a solution of glycine derived peptide (0.2 mmol, 1 eq) and Rh-6G (2 mol%) in dry DCE/CH<sub>3</sub>CN (25/1, 2 mL) was added FeSO<sub>4</sub>·7H<sub>2</sub>O (20 mol%). The mixed solution was irradiated with 18 W blue LEDs under O<sub>2</sub> atmosphere at room temperature, until the glycine dipeptides were gone (monitored by TLC), then **2** (0.15 mmol, 1.5 eq) and HI (0.12 mmol, 30 mol%) were added and stirred at room temperature (without the irradiation of blue LEDs). After completion of the reaction as monitored by TLC, the

solvent was removed under vacuo, and the residue was purified by silica gel column chromatography (with PE/EA = 32/1 to 8/1 as eluent) to afford the products. *Note: The reaction can also be carried out under air atmosphere, but the reaction rate is slow.*

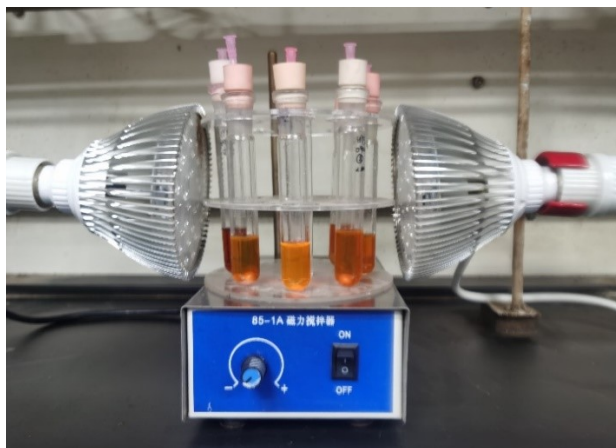

Fig. S1 Picture of photoreaction device.

#### 1.4 Gram Scale Experiment

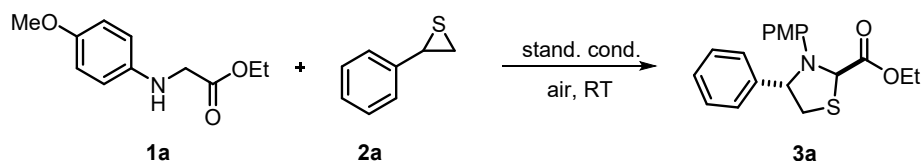

To a solution of **1a** (5 mmol, 1.05 g, 1 eq) and Rh-6G (0.1 mmol, 48 mg, 2 mol%) in dry DCE/CH<sub>3</sub>CN (25/1, 50 mL) was added FeSO<sub>4</sub>·7H<sub>2</sub>O (1 mmol, 278 mg, 20 mol%). The mixed solution was irradiated with 18 W blue LEDs under air atmosphere at room temperature for 24 h, then **2a** (7.5 mmol, 1.02 g, 1.5 eq) and HI (0.75 mmol, 15 mol%) were added and stirred for another 6 h at room temperature (without the irradiation of blue LEDs). After completion of the reaction as monitored by TLC, the solvent was removed under vacuo, and the residue was purified by silica gel column chromatography (with PE/EA = 64/1 to 16/1 as eluent) to afford **3a** (yellow oil, 78 % yield, > 20:1 dr).

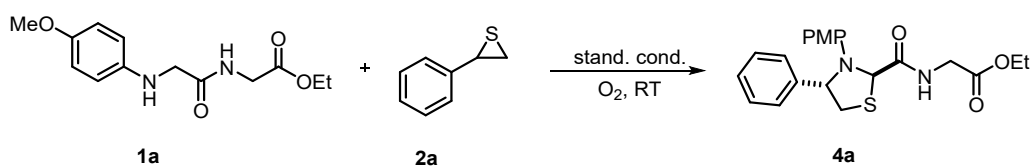

To a solution of **1x** (5 mmol, 1.05 g, 1 eq) and Rh-6G (0.1 mmol, 48 mg, 2 mol%) in dry DCE/CH<sub>3</sub>CN (25/1, 50 mL) was added FeSO<sub>4</sub>·7H<sub>2</sub>O (1 mmol, 278 mg, 20 mol%).

The mixed solution was irradiated with 18 W blue LEDs under air atmosphere at room temperature for 36 h, then **2a** (7.5 mmol, 1.02 g, 1.5 eq) and HI (1.5 mmol, 30 mol%) was added and stirred at room temperature for another 15 h (without the irradiation of blue LEDs). After completion of the reaction as monitored by TLC, the solvent was removed under vacuo, and the residue was purified by silica gel column chromatography (with PE/EA = 32/1 to 8/1 as eluent) to afford **4a** (white solid, 58 % yield, > 20:1 dr).

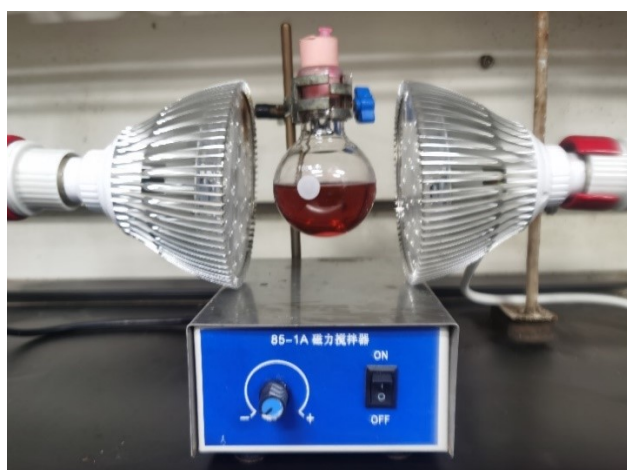

Fig. S2 Picture of set-up for the gram scale reaction.

### 1.5 Synthesis of compound **8a**

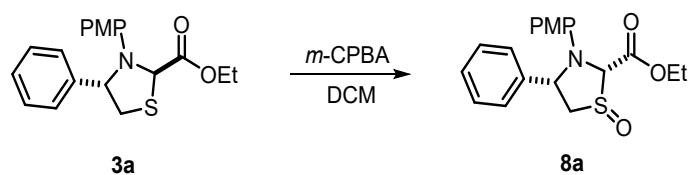

**3a** (0.2 mmol, 68.6 mg) was dissolved in DCM (4 mL), then *m*-CPBA (0.4 mmol, 70 mg) was added and stirred at room temperature. After completion of the reaction as monitored by TLC, the solvent was removed under vacuo, and the residue was purified by silica gel column chromatography to afford **8a**.

### 1.6 Synthesis of compound **8b**

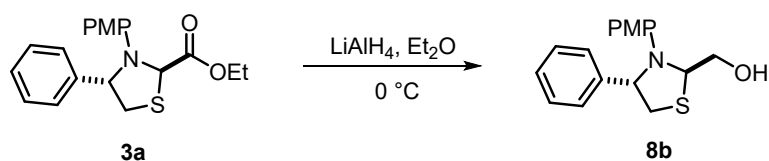

To the suspension of LiAlH<sub>4</sub> (0.12 g, 3.2 mmol) in dry ether (25 mL) was added the solution of **3a** (1.1 g, 3.2 mmol) in dry ether (25 mL) over a period of 10 minutes at 0 °C and let stir at the same temperature for another 1 h. The reaction mixture was then diluted with ether (50 mL) and small ice pieces were added carefully. The solid formed was filtered and the filtrate was evaporated to afford **8b** as a colorless liquid, which was taken ahead to the next step without further purification.

### 1.7 Synthesis of compound **8c**

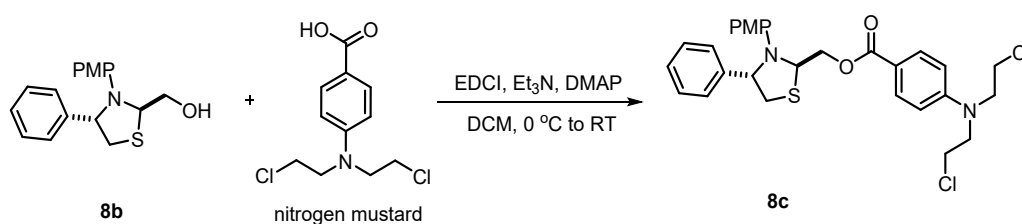

**8b** (0.2 mmol, 60.2 mg) was dissolved in DCM (4 mL) and placed in an ice bath, then Et<sub>3</sub>N (0.3 mmol, 30.4 mg), DMAP (0.3 mmol, 37 mg), EDCI (0.4 mmol, 79.6 mg) and 4-(bis(2-chloroethyl)amino)benzoic acid (0.4 mmol, 104.4 mg) were added respectively. The mixture was stirred at 0 °C for 30 min and then allowed to react at room temperature. After completion of the reaction as monitored by TLC, the reaction was quenched by adding water, and then extracted with DCM and dried with anhydrous Na<sub>2</sub>SO<sub>4</sub>. The solvent was removed under vacuo, and the residue was purified by silica gel column chromatography to afford **8c**.

### 1.8 Synthesis of compound **8d**

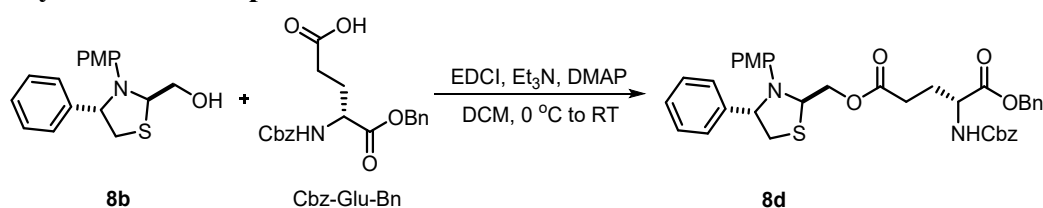

**8b** (0.2 mmol, 60.2 mg) was dissolved in DCM (4 mL) and placed in an ice bath, then Et<sub>3</sub>N (0.3 mmol, 30.4 mg), DMAP (0.3 mmol, 37 mg), EDCI (0.4 mmol, 79.6 mg) and Cbz-Glu-Bn (0.4 mmol, 104.4 mg) were added respectively. The mixture was stirred at 0 °C for 30 min and then allowed to react at room temperature. After completion of the reaction as monitored by TLC, the reaction was quenched by adding water, and then extracted with DCM and dried with anhydrous Na<sub>2</sub>SO<sub>4</sub>. The solvent was removed under vacuo, and the residue was purified by silica gel column chromatography to afford **8d**.

## 1.9 Substrate limitation

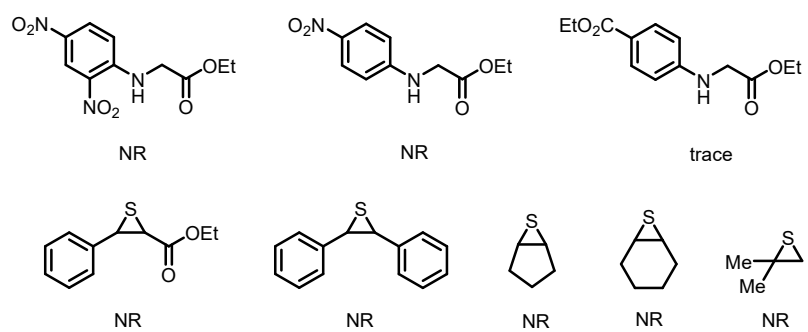

**Scheme S1** Unsuccessful glycine derivatives and thiiranes (NR means no reaction).

## 1.10 Gram-scale reaction and synthetic application of the product

a) Gram-scale synthesis

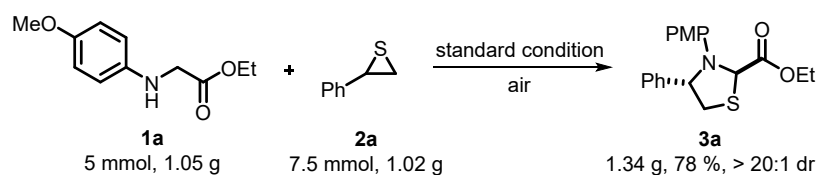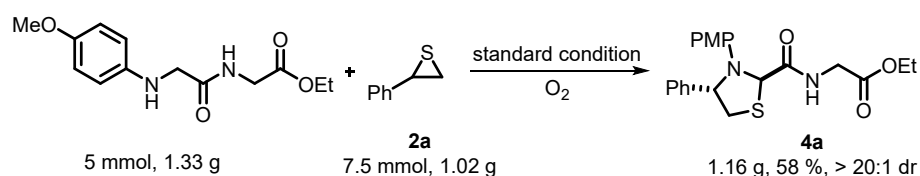

b) Synthesis of sulfoxide-proline

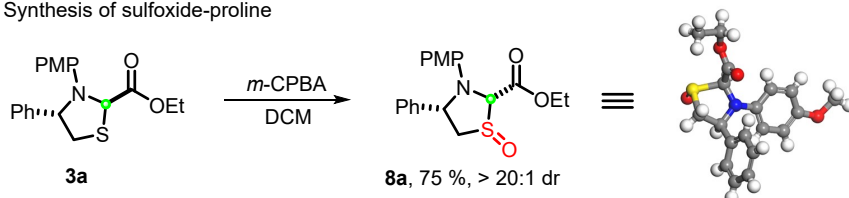

c) Synthesis of unnatural amino alcohol

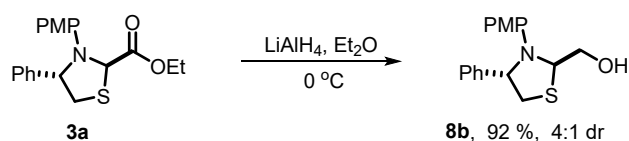

d) Modification of 4-(bis(2-chloroethyl)amino)benzoic acid with unnatural amino alcohol **8b**

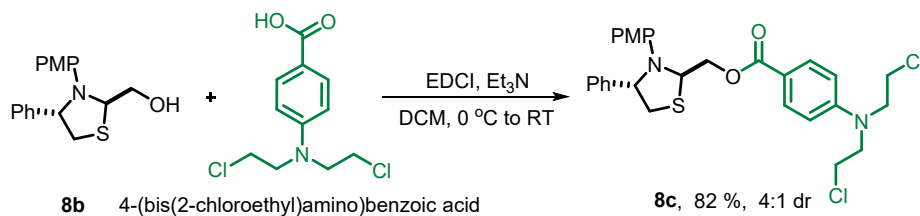

e) Modification of Cbz-Glu-Bn with unnatural amino alcohol **8b**

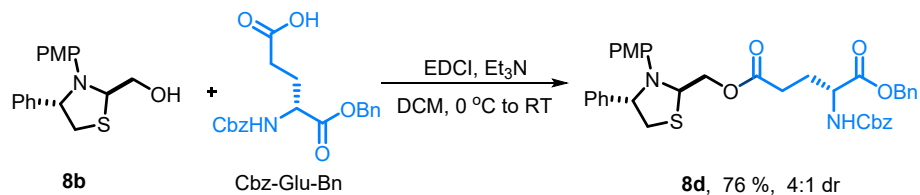

**Scheme S2** Gram-scale reaction and synthetic application of the product.

## 2. Optimization of Reaction Conditions

Table S1. Screening of light source <sup>a</sup>

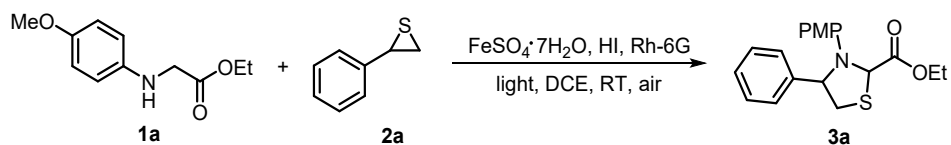

| Entry | Light Source | Yield (%) <sup>b</sup> | dr <sup>c</sup> |
|-------|--------------|------------------------|-----------------|
| 1     | 450-470 nm   | 66                     | 1:1             |
| 2     | Blue LED     | 68                     | 5:1             |
| 3     | Purple LED   | 58                     | 2:1             |
| 4     | Green LED    | 62                     | 5:1             |
| 5     | White LED    | 55                     | 2:1             |

<sup>a</sup> Reaction conditions: **1a** (0.1 mmol), Rh-6G (2 mol%),  $\text{FeSO}_4 \cdot 7\text{H}_2\text{O}$  (3 mol%), DCE (1.0 mL), LED light irradiation under air at room temperature for 16 h, then **2a** (0.15 mmol) and HI (15 mol%) were added and stirred under air at room temperature. <sup>b</sup> Yields were determined by <sup>1</sup>H NMR analysis using 1,3,5-trimethoxybenzene as an internal standard. <sup>c</sup> Determined by <sup>1</sup>H NMR.



**Table S2.** Screening of photocatalyst <sup>a</sup>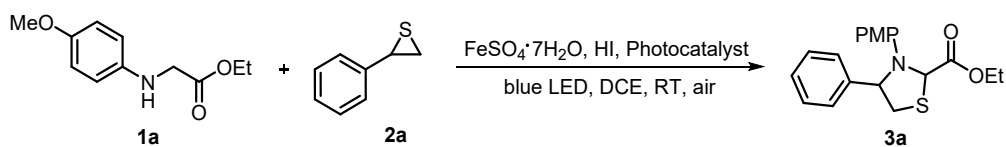

| Entry          | Photocatalyst                                                  | Yield (%) <sup>b</sup> | dr <sup>c</sup> |
|----------------|----------------------------------------------------------------|------------------------|-----------------|
| 1 <sup>d</sup> | Rh-6G                                                          | 57                     | 4:1             |
| 2 <sup>e</sup> | Rh-6G                                                          | 55                     | 3:1             |
| 3              | $\text{Ru}(\text{bpy})_3\text{Cl}_2 \cdot 6\text{H}_2\text{O}$ | 31                     | 5.3:1           |
| 4              | Eosin Y                                                        | trace                  | —               |
| 5              | Victoria blue B                                                | 63                     | 3:1             |
| 6              | Eosin B                                                        | trace                  | —               |
| 7              | Malachite Green                                                | trace                  | —               |
| 8              | Rhodamine B                                                    | 35                     | 5.3:1           |

<sup>a</sup> Reaction conditions: **1a** (0.1 mmol), photocatalyst (2 mol%),  $\text{FeSO}_4 \cdot 7\text{H}_2\text{O}$  (3 mol%), DCE (1.0 mL), 18 W blue LED light irradiation under air at room temperature for 16 h, then **2a** (0.15 mmol) and HI (15 mol%) were added and stirred under air at room temperature. <sup>b</sup> Yields were determined by <sup>1</sup>H NMR analysis using 1,3,5-trimethoxybenzene as an internal standard. <sup>c</sup> Determined by <sup>1</sup>H NMR. <sup>d</sup> 5 mol% Rh-6G was used. <sup>e</sup> 10 mol% Rh-6G was used.

**Table S3.** Screening of solvents <sup>a</sup>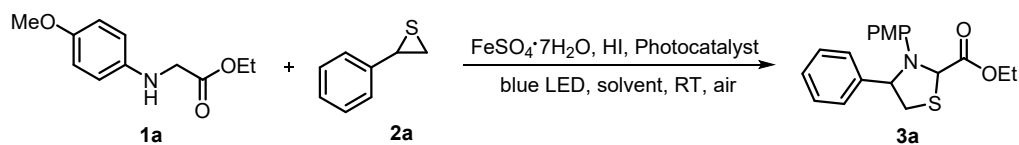

| Entry           | Solvent                            | Yield (%) <sup>b</sup> | dr <sup>c</sup> |
|-----------------|------------------------------------|------------------------|-----------------|
| 1               | CH <sub>3</sub> CN                 | 68                     | > 20:1          |
| 2               | DCE/CH <sub>3</sub> CN (10/1)      | 70                     | > 20:1          |
| 3               | DCE/CH <sub>3</sub> CN (15/1)      | 78                     | > 20:1          |
| 4               | DCE/CH <sub>3</sub> CN (20/1)      | 71                     | > 20:1          |
| 5               | DCE/CH <sub>3</sub> CN (25/1)      | 82                     | > 20:1          |
| 6               | DCE/CH <sub>3</sub> CN (30/1)      | 65                     | > 20:1          |
| 7               | Toluene                            | ND                     | —               |
| 8               | CH <sub>3</sub> OH                 | trace                  | —               |
| 9               | CH <sub>3</sub> CH <sub>2</sub> OH | trace                  | —               |
| 10              | DMF                                | trace                  | —               |
| 11              | DMAc                               | trace                  | —               |
| 12              | DMSO                               | ND                     | —               |
| 13              | THF                                | ND                     | —               |
| 14              | Diethyl ether                      | ND                     | —               |
| 15              | DCM                                | ND                     | —               |
| 16              | 1,4-dioxane                        | trace                  | —               |
| 17              | CHCl <sub>3</sub>                  | 58                     | > 20:1          |
| 18              | TFA                                | ND                     | —               |
| 19              | EtOAc                              | 35                     | 1.7:1           |
| 20 <sup>d</sup> | DCE/CH <sub>3</sub> CN (25/1)      | 44                     | > 20:1          |
| 21 <sup>e</sup> | DCE/CH <sub>3</sub> CN (25/1)      | 65                     | > 20:1          |
| 22 <sup>f</sup> | DCE/CH <sub>3</sub> CN (25/1)      | 70                     | 9:1             |

<sup>a</sup> Reaction conditions: **1a** (0.1 mmol), Rh-6G (2 mol%),  $\text{FeSO}_4 \cdot 7\text{H}_2\text{O}$  (3 mol%), solvent (1.0 mL), 18 W blue LED light irradiation under air at room temperature for 16 h, then **2a** (0.15 mmol) and HI (15 mol%) were added and stirred under air at room temperature. <sup>b</sup> Yields were determined by <sup>1</sup>H NMR analysis using 1,3,5-trimethoxybenzene as an internal standard. <sup>c</sup> Determined by <sup>1</sup>H NMR. <sup>d</sup> 3 mL DCE/CH<sub>3</sub>CN (25/1) was used. <sup>e</sup> 2 mL DCE/CH<sub>3</sub>CN (25/1) was used. <sup>f</sup> 0.5 mL DCE/CH<sub>3</sub>CN (25/1) was used.

**Table S4.** Screening of Lewis acid <sup>a</sup>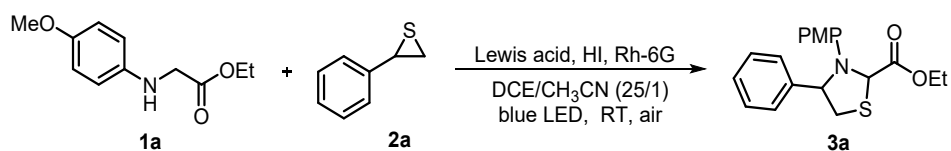

| Entry          | Lewis acid                              | Yield (%) <sup>b</sup> | dr <sup>c</sup> |
|----------------|-----------------------------------------|------------------------|-----------------|
| 1 <sup>d</sup> | FeSO <sub>4</sub> ·7H <sub>2</sub> O    | 79                     | > 20:1          |
| 2 <sup>e</sup> | <b>FeSO<sub>4</sub>·7H<sub>2</sub>O</b> | <b>86</b>              | > 20:1          |
| 3 <sup>f</sup> | FeSO <sub>4</sub> ·7H <sub>2</sub> O    | 67                     | > 20:1          |
| 4              | CuSO <sub>4</sub> ·5H <sub>2</sub> O    | trace                  | —               |
| 5              | Cu(OTf) <sub>2</sub>                    | 39                     | > 20:1          |
| 6              | Fe(OTf) <sub>2</sub>                    | 48                     | > 20:1          |
| 7              | Ce(OTf) <sub>3</sub>                    | 53                     | > 20:1          |

<sup>a</sup> Reaction conditions: **1a** (0.1 mmol), Rh-6G (2 mol%), Lewis acid (3 mol%), DCE/CH<sub>3</sub>CN (25/1) (1.0 mL), 18 W blue LED light irradiation under air at room temperature for 16 h, then **2a** (0.15 mmol) and HI (15 mol%) were added and stirred under air at room temperature. <sup>b</sup> Yields were determined by <sup>1</sup>H NMR analysis using 1,3,5-trimethoxybenzene as an internal standard. <sup>c</sup> Determined by <sup>1</sup>H NMR. <sup>d</sup> 10 mol% FeSO<sub>4</sub>·7H<sub>2</sub>O was used. <sup>e</sup> 20 mol% FeSO<sub>4</sub>·7H<sub>2</sub>O was used. <sup>f</sup> 30 mol% FeSO<sub>4</sub>·7H<sub>2</sub>O was used.

**Table S5.** Screening the equivalent of **2a** <sup>a</sup>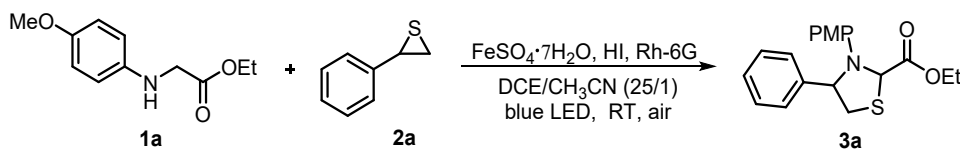

| Entry    | Equivalent | Yield (%) <sup>b</sup> | dr <sup>c</sup>  |
|----------|------------|------------------------|------------------|
| 1        | 1.0        | 43                     | 60:40            |
| 2        | 1.2        | 48                     | 63:37            |
| <b>3</b> | <b>1.5</b> | <b>86</b>              | <b>&gt; 20:1</b> |

<sup>a</sup> Reaction conditions: **1a** (0.1 mmol), Rh-6G (2 mol%), FeSO<sub>4</sub>·7H<sub>2</sub>O (20 mol%), DCE/CH<sub>3</sub>CN (25/1), 18 W blue LED light irradiation under air at room temperature for 16 h, then **2a** and HI (15 mol%) were added and stirred under air at room temperature. <sup>b</sup> Yields were determined by <sup>1</sup>H NMR analysis using 1,3,5-trimethoxybenzene as an internal standard. <sup>c</sup> Determined by <sup>1</sup>H NMR.

**Table S6.** Screening the equivalent of HI <sup>a</sup>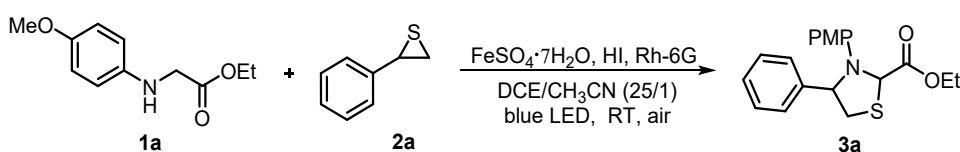

| Entry    | Equivalent  | Yield (%) <sup>b</sup> | dr <sup>c</sup>  |
|----------|-------------|------------------------|------------------|
| 1        | 0.05        | 44                     | 89:11            |
| 2        | 0.1         | 55                     | 95:5             |
| <b>3</b> | <b>0.15</b> | <b>86</b>              | <b>&gt; 20:1</b> |
| 4        | 0.25        | 66                     | 92:8             |

<sup>a</sup> Reaction conditions: **1a** (0.1 mmol), Rh-6G (2 mol%), FeSO<sub>4</sub>·7H<sub>2</sub>O (20 mol%), DCE/CH<sub>3</sub>CN (25/1) (1 mL), 18 W blue LED light irradiation under air at room temperature for 16 h, then **2a** (0.15 mmol) and HI were added and stirred under air at room temperature. <sup>b</sup> Yields were determined by <sup>1</sup>H NMR analysis using 1,3,5-trimethoxybenzene as an internal standard. <sup>c</sup> Determined by <sup>1</sup>H NMR.

### 3. Mechanistic Investigation

#### 3.1 Control experiments

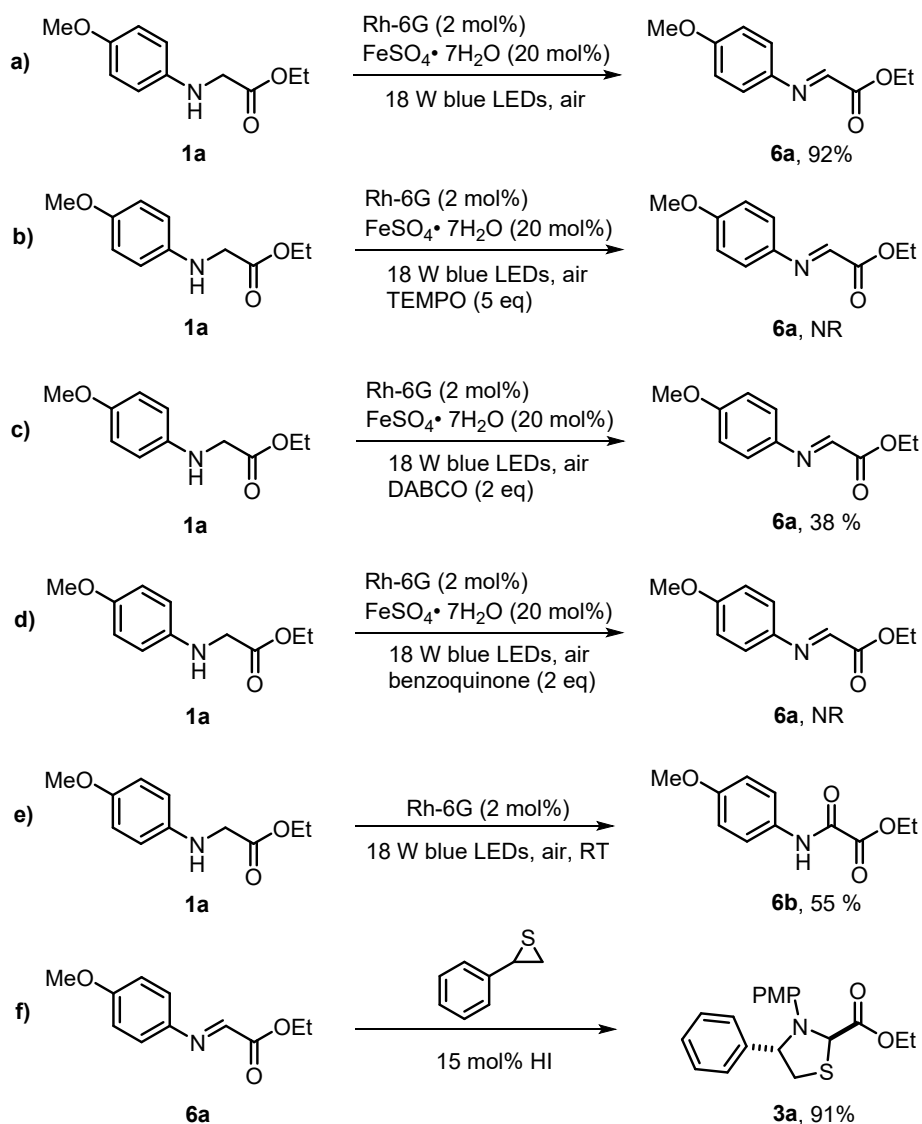

Scheme S3 Control experiment.

### 3.2 Cyclic voltammetry experiments

Cyclic Voltammetry was performed on a CH Instruments Electrochemical Workstation model CHI760E. A solution of **1a** or **1a-FeSO<sub>4</sub>·7H<sub>2</sub>O** in DCE ( $2 \times 10^{-7}$  M) was tested with 0.1 M Bu<sub>4</sub>NPF<sub>6</sub> as the supporting electrolyte, using a glassy carbon as the working electrode, a Pt as the counter electrode, and a saturated calomel electrode reference electrode. Scan rate = 0.05 V/s, 1 sweep segments, a sample interval of 0.001 V.

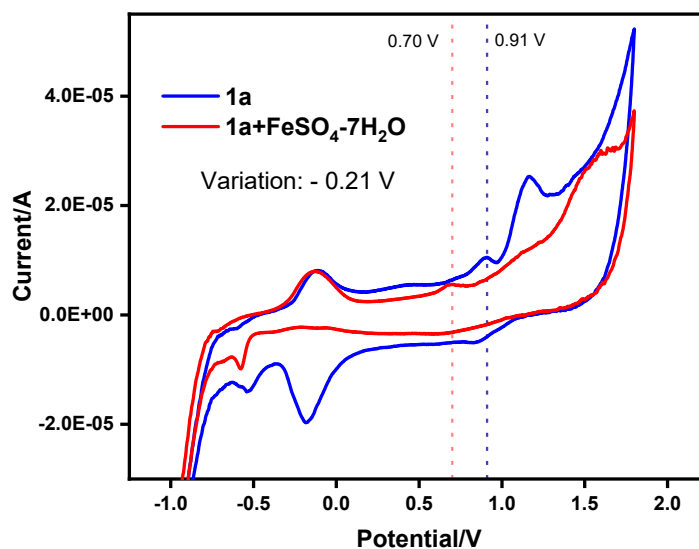

**Fig. S3** Cyclic Voltammetry of **1a** and **1a-FeSO<sub>4</sub>·7H<sub>2</sub>O** in DCE

### 3.3 UV/Vis absorption spectra

The UV/Vis absorption spectra were recorded in 1 cm path quartz cuvettes by using a Varian Cary 300 Conc UV/Vis spectrometer. Sample preparation method: **1a** (0.125 mmol) was dissolved in 10 mL DCE, then the solution was divided into two parts,  $\text{FeSO}_4 \cdot 7\text{H}_2\text{O}$  (20 mol%) was added to one of them and ultrasonic treatment was performed for 60 min.

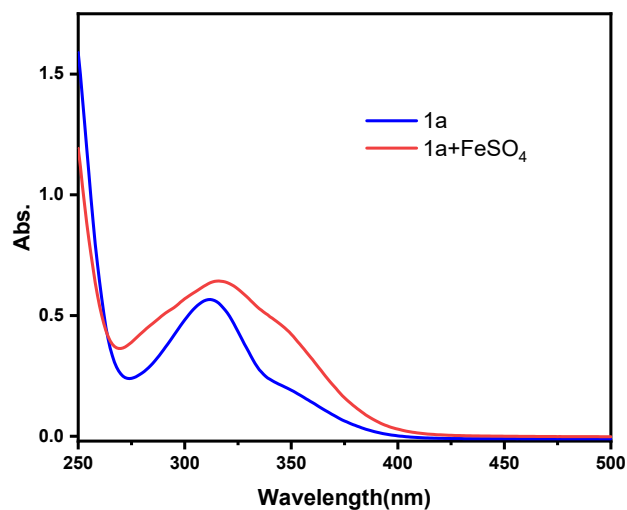

**Fig. S4** The UV-Vis spectra of **1a** and **1a + FeSO<sub>4</sub>·7H<sub>2</sub>O**

### 3.4 EPR spectra

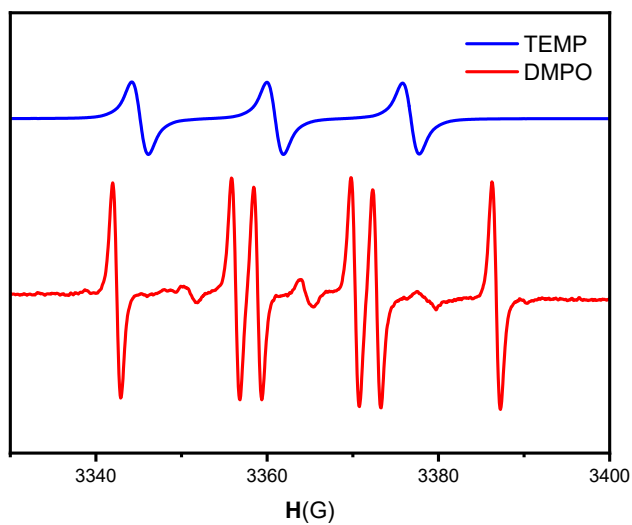

**Fig. S5** EPR spectra of **1a** (0.1 M), Rh-6G ( $1 \times 10^{-3}$  M) and DMPO (0.05 M) or TEMP (0.5 M) in air-saturated DCE upon irradiation with blue LED for 100 s. These results illustrate that  $O_2^{\cdot -}$  generated from molecular oxygen is the primary active species in this photocatalytic oxidative reaction.



### 3.5 Stern-Volmer fluorescence quenching study

DCE was degassed with a stream of argon for 30 min. Rh-6G was dissolved in 10.0 mL DCE to prepare a  $1.0 \times 10^{-7}$  M solution. 0.1 mL of this solution was added to each of a set of 6 volumetric flasks (10 mL). Subsequently, the solution of quencher **1a** in DCE (1.0 mL,  $2 \times 10^{-3}$  M) was added in increasing amounts to the volumetric flasks, emission intensities were recorded.

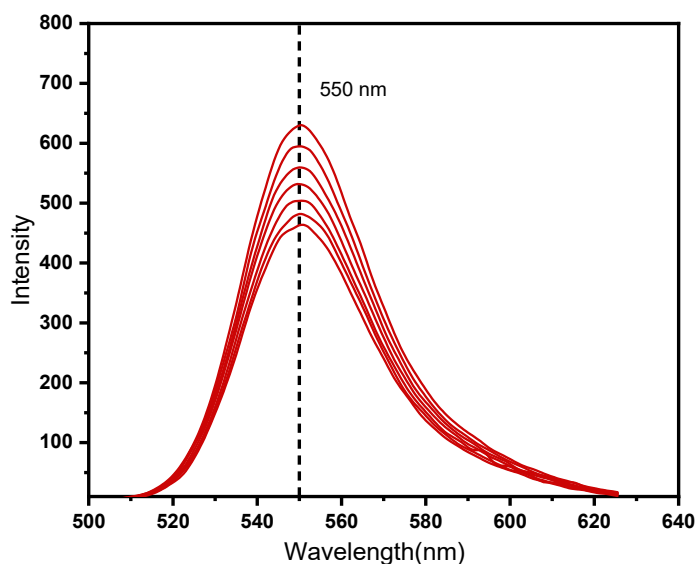

Fig. S6 Changes in the fluorescence spectra

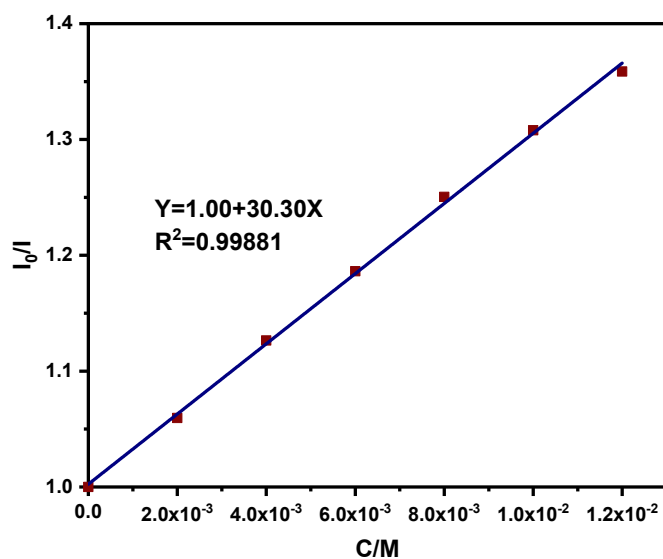

Fig. S7 Stern-Volmer Plot

## 4. Computational Study

### 4.1 Computational methods

All calculations were carried out with the Gaussian 09 D.01 programs.<sup>3</sup> Ground state geometry were fully optimized by using density functional theory (DFT)<sup>4</sup> and the B3LYP<sup>5</sup>-D3 method with the 6-31G(d,p) basis set for C, H, O, N, S atoms and Lanl2DZ for Fe atom. Frequency calculations have been performed. The 3D molecular structures were generated using the CYL-view.<sup>6</sup> Using this geometry (singlet and triplet), single point time dependent density functional theory (TD-DFT) calculation was then performed using the CAM-B3LYP-D3/6-31G(d,p)/Lanl2DZ level of theory. The effect of solvent is considered from Truhlar and co-workers' universal solvation model (SMD<sup>7</sup>-DCE).

### 4.2 Optimized structure of 1a+ FeSO<sub>4</sub>

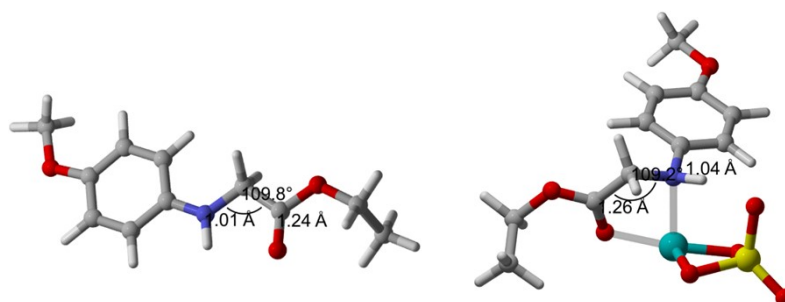

Optimized structure of 1a and 1a + FeSO<sub>4</sub>

|          | 1a      | FeSO <sub>4</sub> | 1a + FeSO <sub>4</sub> | $\Delta E$ | $\Delta E/\text{kcal mol}^{-1}$ |
|----------|---------|-------------------|------------------------|------------|---------------------------------|
| ZPE      | -708.19 | -822.16           | -1530.46               | -0.11      | -69.03                          |
| Enthalpy | -708.17 | -822.15           | -1530.44               | -0.12      | -75.30                          |
| Gibbs    | -708.24 | -822.19           | -1530.52               | -0.09      | -56.48                          |

\* Unmarked energies in the table are given in Hartree.

### 4.3 Theory predicts UV-Vis spectrum of 1a and 1a+ FeSO<sub>4</sub>

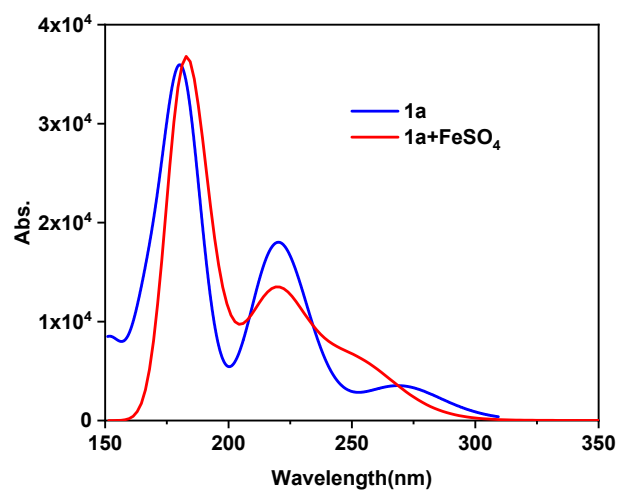

Fig. S8 Theory predicts UV/Vis absorption spectra

#### 4.4 The relative energies of the *cis*- and *trans*-products

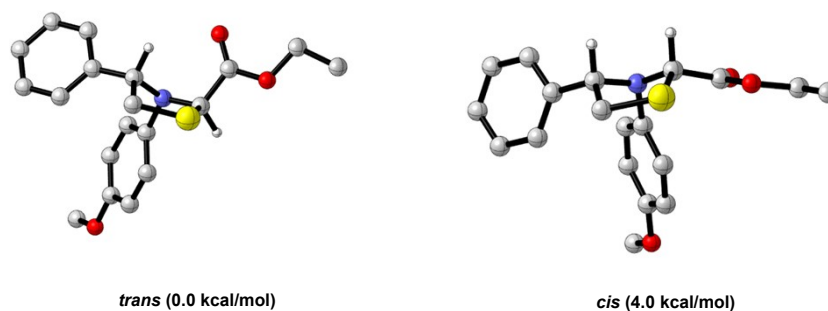

#### 4.5 The Cartesian Coordinates

1a

0 1

|   |             |             |             |
|---|-------------|-------------|-------------|
| C | -3.66387600 | 0.15410200  | 0.06597200  |
| C | -3.08731000 | 1.43408700  | 0.07533000  |
| C | -1.70875800 | 1.58472400  | 0.01303900  |
| C | -0.85608100 | 0.45661700  | -0.06072800 |
| C | -1.44624900 | -0.82086400 | -0.06985900 |
| C | -2.84008100 | -0.97090400 | -0.00686800 |
| H | -3.74322400 | 2.29510400  | 0.13194900  |

|   |             |             |             |
|---|-------------|-------------|-------------|
| H | -1.27449300 | 2.58051000  | 0.02084500  |
| H | -0.82962700 | -1.71078000 | -0.12524100 |
| H | -3.25663600 | -1.97088700 | -0.01602000 |
| O | -5.06197100 | 0.12069800  | 0.13277100  |
| C | -5.71372200 | -1.17210200 | 0.12935000  |
| H | -5.40980200 | -1.77755700 | 0.99358700  |
| H | -6.78103400 | -0.95912700 | 0.18909600  |
| H | -5.49995400 | -1.72754800 | -0.79348800 |
| C | 2.86859800  | 0.09777100  | -0.25005500 |
| O | 3.16605400  | 1.29857100  | -0.21559000 |
| O | 3.78120400  | -0.91395200 | -0.33827000 |
| C | 5.22128100  | -0.53976400 | -0.37540100 |
| H | 5.33049400  | 0.33280000  | -1.02514900 |
| H | 5.69389700  | -1.40997600 | -0.83233300 |
| C | 5.73648800  | -0.26384900 | 1.02952100  |
| H | 5.55948700  | -1.12475100 | 1.68152400  |
| H | 6.81445900  | -0.06764800 | 0.99972100  |
| H | 5.23873900  | 0.61295600  | 1.45294300  |
| N | 0.51986500  | 0.63691900  | -0.12095500 |
| H | 0.90906900  | 1.56794900  | -0.10912000 |
| C | 1.46074000  | -0.44890400 | -0.20277800 |
| H | 1.30803800  | -1.07451900 | -1.09793400 |
| H | 1.39306200  | -1.13297100 | 0.65987300  |

**1a + FeSO<sub>4</sub>**

0 5

|   |            |             |             |
|---|------------|-------------|-------------|
| C | 4.01031600 | -0.44021500 | -0.05643900 |
| C | 3.18058200 | -1.57362800 | 0.01259600  |
| C | 1.83889600 | -1.44090000 | 0.34105400  |

|    |             |             |             |
|----|-------------|-------------|-------------|
| C  | 1.30610600  | -0.16408100 | 0.61300800  |
| C  | 2.12635900  | 0.96402000  | 0.53589300  |
| C  | 3.48330800  | 0.82915700  | 0.20162100  |
| H  | 3.61241500  | -2.54414300 | -0.19840500 |
| H  | 1.18250000  | -2.30372100 | 0.37368300  |
| H  | 1.73953000  | 1.95732800  | 0.73892100  |
| H  | 4.10335000  | 1.71519100  | 0.15301200  |
| O  | 5.33498500  | -0.69102700 | -0.39114000 |
| C  | 6.25669300  | 0.42739800  | -0.48021300 |
| H  | 6.34356800  | 0.94874700  | 0.48124100  |
| H  | 7.21618900  | -0.01343200 | -0.74741800 |
| H  | 5.94646900  | 1.13768200  | -1.25677500 |
| C  | -0.96078200 | 2.13304500  | 0.39727600  |
| O  | -1.15525800 | 1.75870900  | -0.79407800 |
| O  | -1.04992800 | 3.40020200  | 0.78258500  |
| C  | -1.49545400 | 4.44140700  | -0.21573100 |
| H  | -0.96882000 | 4.24218300  | -1.15162000 |
| H  | -1.13847900 | 5.36526500  | 0.23728900  |
| C  | -3.00532700 | 4.39457600  | -0.37259100 |
| H  | -3.50181800 | 4.52830400  | 0.59264000  |
| H  | -3.32527800 | 5.20325800  | -1.03902900 |
| H  | -3.32452500 | 3.44514700  | -0.81136600 |
| N  | -0.10767200 | -0.08543500 | 0.90702100  |
| H  | -0.45996400 | -0.94351900 | 1.37706700  |
| Fe | -1.24541400 | -0.31260000 | -0.99211500 |
| S  | -2.23017300 | -2.54039800 | 0.16083600  |
| O  | -1.34311400 | -2.57710400 | 1.55743900  |
| O  | -1.07380300 | -2.24528000 | -1.16087400 |
| O  | -2.89693700 | -0.92042600 | 0.00359600  |

|   |             |             |             |
|---|-------------|-------------|-------------|
| C | -0.64675600 | 1.14353100  | 1.50063700  |
| H | 0.00714300  | 1.60362100  | 2.24837700  |
| H | -1.59918600 | 0.88482200  | 1.98012000  |
| O | -3.26338100 | -3.74264700 | -0.11851900 |

## 5. X-ray Crystal Structure for Compound 3m and 8a

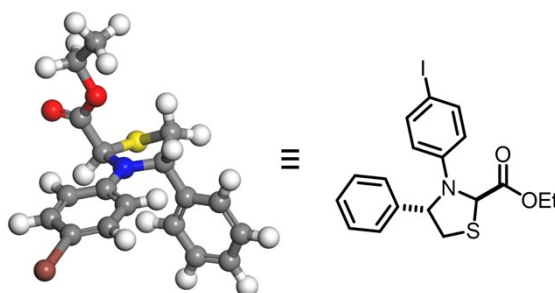

|                                                   |                                                               |
|---------------------------------------------------|---------------------------------------------------------------|
| <b>Empirical formula</b>                          | C <sub>18</sub> H <sub>18</sub> INO <sub>2</sub> S            |
| <b>Formula weight</b>                             | 439.29                                                        |
| <b>Temperature/K</b>                              | 150.00(10)                                                    |
| <b>Crystal system</b>                             | monoclinic                                                    |
| <b>Space group</b>                                | P2 <sub>1</sub> /c                                            |
| <b>a/Å</b>                                        | 8.96313(11)                                                   |
| <b>b/Å</b>                                        | 6.06546(8)                                                    |
| <b>c/Å</b>                                        | 32.0458(3)                                                    |
| <b>α/°</b>                                        | 90                                                            |
| <b>β/°</b>                                        | 91.1858(10)                                                   |
| <b>γ/°</b>                                        | 90                                                            |
| <b>Volume/Å<sup>3</sup></b>                       | 1741.81(4)                                                    |
| <b>Z</b>                                          | 4                                                             |
| <b>ρ<sub>calc</sub>/cm<sup>3</sup></b>            | 1.675                                                         |
| <b>μ/mm<sup>-1</sup></b>                          | 15.635                                                        |
| <b>F(000)</b>                                     | 872.0                                                         |
| <b>Crystal size/mm<sup>3</sup></b>                | 0.12 × 0.08 × 0.07                                            |
| <b>Radiation</b>                                  | Cu Kα (λ = 1.54184)                                           |
| <b>2θ range for data collection/°</b>             | 5.516 to 154.948                                              |
| <b>Index ranges</b>                               | -11 ≤ h ≤ 11, -7 ≤ k ≤ 7, -24 ≤ l ≤ 40                        |
| <b>Reflections collected</b>                      | 10301                                                         |
| <b>Independent reflections</b>                    | 3442 [R <sub>int</sub> = 0.0471, R <sub>sigma</sub> = 0.0401] |
| <b>Data/restraints/parameters</b>                 | 3442/0/209                                                    |
| <b>Goodness-of-fit on F<sup>2</sup></b>           | 1.064                                                         |
| <b>Final R indexes [I ≥ 2σ (I)]</b>               | R <sub>1</sub> = 0.0412, wR <sub>2</sub> = 0.1161             |
| <b>Final R indexes [all data]</b>                 | R <sub>1</sub> = 0.0421, wR <sub>2</sub> = 0.1172             |
| <b>Largest diff. peak/hole / e Å<sup>-3</sup></b> | 1.12/-1.38                                                    |

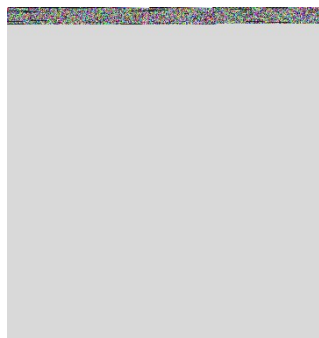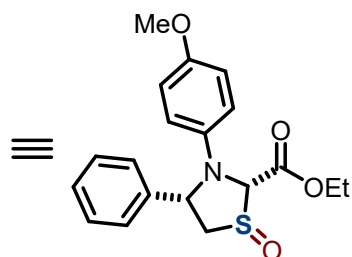

|                                       |                                                   |
|---------------------------------------|---------------------------------------------------|
| <b>Empirical formula</b>              | C <sub>19</sub> H <sub>21</sub> NO <sub>4</sub> S |
| <b>Formula weight</b>                 | 338.51                                            |
| <b>Temperature/K</b>                  | 149.99(10)                                        |
| <b>Crystal system</b>                 | monoclinic                                        |
| <b>Space group</b>                    | P21/n                                             |
| <b>a/Å</b>                            | 6.61353(9)                                        |
| <b>b/Å</b>                            | 27.3767(4)                                        |
| <b>c/Å</b>                            | 10.14913(14)                                      |
| <b>α /°</b>                           | 90                                                |
| <b>β /°</b>                           | 104.4142(14)                                      |
| <b>γ /°</b>                           | 90                                                |
| <b>Volume/Å<sup>3</sup></b>           | 1779.73(4)                                        |
| <b>Z</b>                              | 4                                                 |
| <b>ρ calcd/cm<sup>3</sup></b>         | 1.263                                             |
| <b>μ /mm<sup>-1</sup></b>             | 1.813                                             |
| <b>F(000)</b>                         | 677.0                                             |
| <b>Crystal size/mm<sup>3</sup></b>    | 0.18 × 0.16 × 0.12                                |
| <b>Radiation</b>                      | Cu K α ( λ = 1.54184)                             |
| <b>2θ range for data collection/°</b> | 6.458 to 155.174                                  |
| <b>Index ranges</b>                   | -6 ≤ h ≤ 8, -33 ≤ k ≤ 31, -12 ≤ l ≤ 12            |
| <b>Reflections collected</b>          | 11436                                             |



|                                                   |                                       |
|---------------------------------------------------|---------------------------------------|
| <b>Independent reflections</b>                    | 3576 [Rint = 0.0424, Rsigma = 0.0420] |
| <b>Data/restraints/parameters</b>                 | 3576/0/229                            |
| <b>Goodness-of-fit on F<sup>2</sup></b>           | 1.068                                 |
| <b>Final R indexes [I ≥ 2σ (I)]</b>               | R1 = 0.0406, wR2 = 0.1101             |
| <b>Final R indexes [all data]</b>                 | R1 = 0.0437, wR2 = 0.1125             |
| <b>Largest diff. peak/hole / e Å<sup>-3</sup></b> | 0.41/-0.51                            |

## 6. Product Data

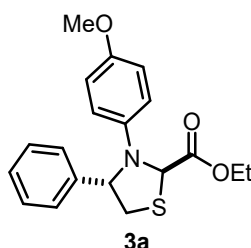

***Ethyl 3-(4-methoxyphenyl)-4-phenylthiazolidine-2-carboxylate (3a)***. Purified by flash column chromatography (silica gel, PE/EA = 64/1 to 16/1 as eluent). Colorless oily liquid, 83 % yield, > 20:1 dr. <sup>1</sup>H NMR (400 MHz, CDCl<sub>3</sub>) δ 7.35-7.26 (m, 5H), 6.71 (d, *J* = 9.1 Hz, 2H), 6.46 (d, *J* = 9.2 Hz, 2H), 5.38 (s, 1H), 5.27 (dd, *J* = 7.2, 1.6 Hz, 1H), 4.30-4.17 (m, 2H), 3.98 (dd, *J* = 11.2, 7.2 Hz, 1H), 3.68 (s, 3H), 2.90 (dd, *J* = 11.2, 1.5 Hz, 1H), 1.28 (t, *J* = 7.1 Hz, 3H); <sup>13</sup>C NMR (101 MHz, CDCl<sub>3</sub>) δ 171.9, 152.3, 142.6, 138.8, 128.7, 127.6, 126.5, 115.0, 114.9, 66.0, 64.1, 61.7, 55.7, 39.3, 14.3. HRMS (ESI) calcd for C<sub>19</sub>H<sub>22</sub>NO<sub>3</sub>S (M+H<sup>+</sup>) 344.1315, found 344.1316.

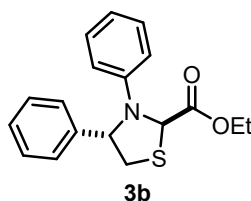

***Ethyl 3,4-diphenylthiazolidine-2-carboxylate (3b)***. Purified by flash column chromatography (silica gel, PE/EA = 64/1 to 16/1 as eluent). Light red oily liquid, 58 % yield, > 20:1 dr. <sup>1</sup>H NMR (400 MHz, CDCl<sub>3</sub>) δ 7.35-7.26 (m, 5H), 7.16-7.08 (m, 2H), 6.72-6.68 (m, 1H), 6.50-6.45 (m, 2H), 5.39 (s, 1H), 5.32 (d, *J* = 7.5 Hz, 1H), 4.32-4.16 (m, 2H), 4.01 (dd, *J* = 11.3, 7.1 Hz, 1H), 2.90 (dd, *J* = 11.2, 1.0 Hz, 1H), 1.29 (t, *J* = 7.1 Hz, 3H); <sup>13</sup>C NMR (101 MHz, CDCl<sub>3</sub>) δ 171.7, 144.4, 142.3, 129.4, 128.7, 127.7, 126.4, 118.1, 113.6, 65.9, 63.6, 61.8, 39.3, 14.3. HRMS (ESI) calcd for C<sub>18</sub>H<sub>20</sub>NO<sub>2</sub>S

(M+H<sup>+</sup>) 314.1209, found 314.1210.

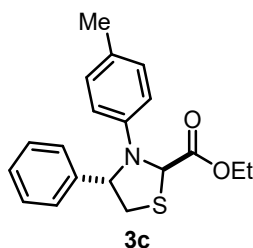

**Ethyl 4-phenyl-3-(p-tolyl)thiazolidine-2-carboxylate (3c).** Purified by flash column chromatography (silica gel, PE/EA = 64/1 to 16/1 as eluent). White solid, 62 % yield, > 20:1 dr. <sup>1</sup>H NMR (400 MHz, CDCl<sub>3</sub>) δ 7.25-7.19 (m, 5H), 6.90-6.82 (m, 2H), 6.37-6.29 (m, 2H), 5.31 (s, 1H), 5.22 (dd, *J* = 7.2, 1.1 Hz, 1H), 4.26-4.07 (m, 2H), 3.93 (dd, *J* = 11.2, 7.2 Hz, 1H), 2.82 (dd, *J* = 11.2, 1.2 Hz, 1H), 2.11 (s, 3H), 1.22 (t, *J* = 7.2 Hz, 3H); <sup>13</sup>C NMR (101 MHz, CDCl<sub>3</sub>) δ 171.8, 142.5, 142.2, 129.9, 128.7, 127.6, 127.1, 126.4, 113.7, 65.8, 63.7, 61.7, 39.3, 20.3, 14.3. HRMS (ESI) calcd for C<sub>19</sub>H<sub>22</sub>NO<sub>2</sub>S (M+H<sup>+</sup>) 328.1366, found 328.1365.

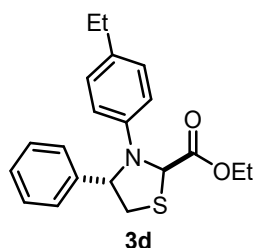

**Ethyl 3-(4-ethylphenyl)-4-phenylthiazolidine-2-carboxylate (3d).** Purified by flash column chromatography (silica gel, PE/EA = 64/1 to 16/1 as eluent). White solid, 71 % yield, > 20:1 dr. <sup>1</sup>H NMR (400 MHz, CDCl<sub>3</sub>) δ 7.32 (d, *J* = 4.3 Hz, 4H), 7.26-7.23 (m, 1H), 6.95 (d, *J* = 8.6 Hz, 2H), 6.41 (d, *J* = 8.6 Hz, 2H), 5.38 (s, 1H), 5.29 (d, *J* = 7.1 Hz, 1H), 4.33-4.15 (m, 2H), 4.00 (dd, *J* = 11.2, 7.2 Hz, 1H), 2.89 (dd, *J* = 11.3, 1.1 Hz, 1H), 2.48 (q, *J* = 7.6 Hz, 2H), 1.29 (t, *J* = 7.1 Hz, 3H), 1.13 (t, *J* = 7.6 Hz, 3H); <sup>13</sup>C NMR (101 MHz, CDCl<sub>3</sub>) δ 171.9, 142.6, 142.4, 133.6, 128.74, 128.69, 127.6, 126.5, 113.6, 65.9, 63.7, 61.7, 39.3, 27.8, 15.7, 14.3. HRMS (ESI) calcd for C<sub>20</sub>H<sub>24</sub>NO<sub>2</sub>S (M+H<sup>+</sup>) 342.1522, found 342.1524.

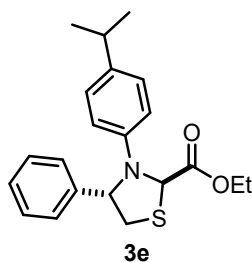

***Ethyl 3-(4-isopropylphenyl)-4-phenylthiazolidine-2-carboxylate (3e)***. Purified by flash column chromatography (silica gel, PE/EA = 64/1 to 16/1 as eluent). White solid, 72 % yield, > 20:1 dr. <sup>1</sup>H NMR (400 MHz, CDCl<sub>3</sub>) δ 7.25-7.18 (m, 5H), 6.93-6.86 (m, 2H), 6.36-6.30 (m, 2H), 5.29 (s, 1H), 5.20 (d, *J* = 7.0 Hz, 1H), 4.25-4.07 (m, 2H), 3.92 (dd, *J* = 11.2, 7.2 Hz, 1H), 2.80 (dd, *J* = 11.2, 1.0 Hz, 1H), 2.67 (hept, *J* = 6.9 Hz, 1H), 1.21 (t, *J* = 7.1 Hz, 3H), 1.07 (dd, *J* = 6.9, 1.4 Hz, 6H); <sup>13</sup>C NMR (101 MHz, CDCl<sub>3</sub>) δ 171.9, 142.7, 142.4, 138.2, 128.7, 127.6, 127.3, 126.5, 113.5, 66.0, 63.7, 61.7, 39.3, 33.1, 24.2, 24.8, 14.3. HRMS (ESI) calcd for C<sub>21</sub>H<sub>26</sub>NO<sub>2</sub>S (M+H<sup>+</sup>) 356.1679, found 356.1680.

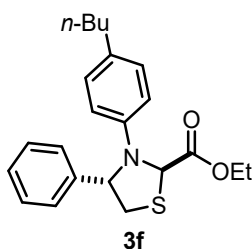

***Ethyl 3-(4-butylphenyl)-4-phenylthiazolidine-2-carboxylate (3f)***. Purified by flash column chromatography (silica gel, PE/EA = 64/1 to 16/1 as eluent). White solid, 48 % yield, > 20:1 dr. <sup>1</sup>H NMR (400 MHz, CDCl<sub>3</sub>) δ 7.32-7.27 (m, 5H), 6.96-6.89 (m, 2H), 6.43-6.36 (m, 2H), 5.37 (s, 1H), 5.28 (d, *J* = 7.1 Hz, 1H), 4.31-4.16 (m, 2H), 4.00 (dd, *J* = 11.2, 7.2 Hz, 1H), 2.88 (dd, *J* = 11.2, 1.1 Hz, 1H), 2.48-2.40 (m, 2H), 1.53-1.44 (m, 2H), 1.29 (t, *J* = 7.1 Hz, 5H), 0.88 (t, *J* = 7.3 Hz, 3H); <sup>13</sup>C NMR (101 MHz, CDCl<sub>3</sub>) δ 171.7, 142.5, 142.2, 132.2, 129.1, 128.5, 127.4, 126.3, 113.4, 65.8, 63.6, 61.6, 39.2, 34.5, 33.7, 22.3, 14.1, 13.9. HRMS (ESI) calcd for C<sub>22</sub>H<sub>28</sub>NO<sub>2</sub>S (M+H<sup>+</sup>) 370.1835, found 370.1830.

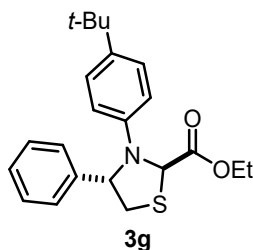

***Ethyl 3-(4-(tert-butyl)phenyl)-4-phenylthiazolidine-2-carboxylate (3g)***. Purified by flash column chromatography (silica gel, PE/EA = 64/1 to 16/1 as eluent). White solid, 30 % yield, > 20:1 dr.  $^1\text{H}$  NMR (400 MHz,  $\text{CDCl}_3$ )  $\delta$  7.36-7.26 (m, 5H), 7.18-7.11 (m, 2H), 6.45-6.39 (m, 2H), 5.38 (s, 1H), 5.29 (d,  $J = 7.0$  Hz, 1H), 4.34-4.16 (m, 2H), 4.01 (dd,  $J = 11.2, 7.2$  Hz, 1H), 2.88 (dd,  $J = 11.3, 1.0$  Hz, 1H), 1.30 (t,  $J = 7.1$  Hz, 3H), 1.22 (s, 9H);  $^{13}\text{C}$  NMR (101 MHz,  $\text{CDCl}_3$ )  $\delta$  171.7, 142.6, 141.9, 140.4, 128.6, 127.5, 126.3, 126.1, 113.1, 65.9, 63.6, 61.6, 39.2, 33.6, 31.4, 14.1. HRMS (ESI) calcd for  $\text{C}_{22}\text{H}_{28}\text{NO}_2\text{S}$  ( $\text{M}+\text{H}^+$ ) 370.1835, found 370.1832.

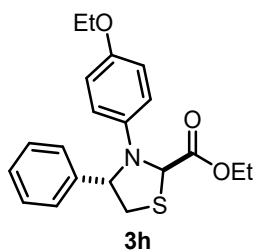

***Ethyl 3-(4-ethoxyphenyl)-4-phenylthiazolidine-2-carboxylate (3h)***. Purified by flash column chromatography (silica gel, PE/EA = 64/1 to 16/1 as eluent). White solid, 81 % yield, > 20:1 dr.  $^1\text{H}$  NMR (400 MHz,  $\text{CDCl}_3$ )  $\delta$  7.26-7.24 (m, 3H), 7.24-7.15 (m, 2H), 6.69-6.59 (m, 2H), 6.43-6.33 (m, 2H), 5.31 (s, 1H), 5.19 (dd,  $J = 7.2, 1.5$  Hz, 1H), 4.23-4.07 (m, 2H), 3.91 (dd,  $J = 11.1, 7.2$  Hz, 1H), 3.83 (q,  $J = 7.0$  Hz, 2H), 2.83 (dd,  $J = 11.2, 1.6$  Hz, 1H), 1.26 (t,  $J = 7.0$  Hz, 3H), 1.21 (t,  $J = 7.1$  Hz, 3H);  $^{13}\text{C}$  NMR (101 MHz,  $\text{CDCl}_3$ )  $\delta$  171.9, 151.6, 142.6, 138.7, 128.7, 127.6, 126.5, 115.7, 115.0, 66.0, 64.1, 63.9, 61.7, 39.3, 15.1, 14.3. HRMS (ESI) calcd for  $\text{C}_{20}\text{H}_{24}\text{NO}_3\text{S}$  ( $\text{M}+\text{H}^+$ ) 358.1471, found 358.1474.

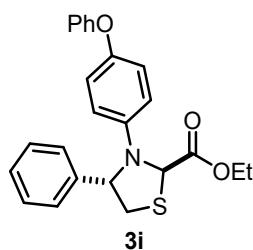

**Ethyl 3-(4-phenoxyphenyl)-4-phenylthiazolidine-2-carboxylate (3i).** Purified by flash column chromatography (silica gel, PE/EA = 64/1 to 16/1 as eluent). White solid, 73 % yield, > 20:1 dr. <sup>1</sup>H NMR (400 MHz, CDCl<sub>3</sub>) δ 7.27 (s, 2H), 7.25-7.19 (m, 2H), 7.18 (d, *J* = 1.9 Hz, 2H), 7.16 (d, *J* = 1.8 Hz, 1H), 6.95-6.90 (m, 1H), 6.84-6.81 (m, 2H), 6.79-6.73 (m, 2H), 6.42-6.37 (m, 2H), 5.31 (s, 1H), 5.25-5.19 (m, 1H), 4.24-4.12 (m, 2H), 3.94 (dd, *J* = 11.3, 7.2 Hz, 1H), 2.83 (dd, *J* = 11.2, 1.2 Hz, 1H), 1.22 (t, *J* = 7.2 Hz, 3H); <sup>13</sup>C NMR (101 MHz, CDCl<sub>3</sub>) δ 171.6, 158.5, 148.3, 142.2, 140.9, 129.5, 128.7, 127.6, 126.3, 122.3, 120.8, 117.6, 114.5, 66.1, 63.8, 61.7, 39.2, 14.2. HRMS (ESI) calcd for C<sub>24</sub>H<sub>24</sub>NO<sub>3</sub>S (M+H<sup>+</sup>) 406.1393, found 406.1388.

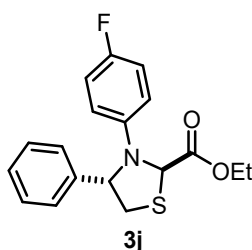

**Ethyl 3-(4-fluorophenyl)-4-phenylthiazolidine-2-carboxylate (3j).** Purified by flash column chromatography (silica gel, PE/EA = 64/1 to 16/1 as eluent). White solid, 91 % yield, > 20:1 dr. <sup>1</sup>H NMR (400 MHz, CDCl<sub>3</sub>) δ 7.36-7.26 (m, 5H), 6.87-6.79 (m, 2H), 6.45-6.38 (m, 2H), 5.36 (s, 1H), 5.26 (dd, *J* = 7.2, 1.3 Hz, 1H), 4.33-4.17 (m, 2H), 3.99 (dd, *J* = 11.2, 7.2 Hz, 1H), 2.90 (dd, *J* = 11.2, 1.3 Hz, 1H), 1.28 (t, *J* = 7.1 Hz, 3H); <sup>13</sup>C NMR (101 MHz, CDCl<sub>3</sub>) δ 171.6, 156.1 (d, *J* = 237.8 Hz), 142.1, 140.9 (d, *J* = 1.9 Hz), 128.8, 127.8, 126.4, 115.9 (d, *J* = 22.4 Hz), 114.6 (d, *J* = 7.5 Hz), 66.2, 64.0, 61.9, 39.3, 14.3. HRMS (ESI) calcd for C<sub>18</sub>H<sub>19</sub>FNO<sub>2</sub>S (M+H<sup>+</sup>) 332.1115, found 332.1116.

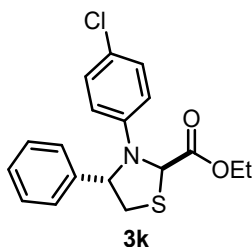

**Ethyl 3-(4-chlorophenyl)-4-phenylthiazolidine-2-carboxylate (3k).** Purified by flash column chromatography (silica gel, PE/EA = 64/1 to 16/1 as eluent). White solid, 66 % yield, > 20:1 dr. <sup>1</sup>H NMR (400 MHz, CDCl<sub>3</sub>) δ 7.31-7.19 (m, 5H), 7.18-7.12 (m, 2H), 6.33-6.27 (m, 2H), 5.29 (s, 1H), 5.22 (d, *J* = 7.1 Hz, 1H), 4.28-4.11 (m, 2H), 3.95 (dd,

$J = 11.3, 7.1$  Hz, 1H), 2.85 (dd,  $J = 11.3, 1.0$  Hz, 1H), 1.24 (t,  $J = 7.1$  Hz, 3H);  $^{13}\text{C}$  NMR (101 MHz,  $\text{CDCl}_3$ )  $\delta$  171.3, 143.4, 141.7, 132.1, 128.8, 127.8, 126.3, 115.2, 110.3, 66.0, 63.6, 62.0, 39.2, 14.3. HRMS (ESI) calcd for  $\text{C}_{18}\text{H}_{19}\text{ClNO}_2\text{S}$  ( $\text{M}+\text{H}^+$ ) 348.0820, found 348.0821.

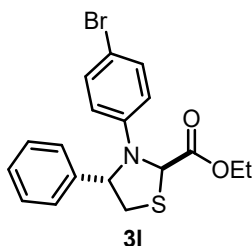

**Ethyl 3-(4-bromophenyl)-4-phenylthiazolidine-2-carboxylate (3i).** Purified by flash column chromatography (silica gel, PE/EA = 64/1 to 16/1 as eluent). White solid, 43 % yield, > 20:1 dr.  $^1\text{H}$  NMR (400 MHz,  $\text{CDCl}_3$ )  $\delta$  7.32-7.19 (m, 5H), 7.05-6.98 (m, 2H), 6.38-6.32 (m, 2H), 5.30 (s, 1H), 5.22 (d,  $J = 7.1$  Hz, 1H), 4.28-4.11 (m, 2H), 3.95 (dd,  $J = 11.3, 7.1$  Hz, 1H), 2.85 (d,  $J = 11.3$  Hz, 1H), 1.24 (t,  $J = 7.1$  Hz, 3H);  $^{13}\text{C}$  NMR (101 MHz,  $\text{CDCl}_3$ )  $\delta$  171.3, 143.0, 141.8, 129.3, 128.8, 127.8, 126.4, 123.1, 114.7, 66.0, 63.6, 61.9, 39.2, 14.3. HRMS (ESI) calcd for  $\text{C}_{18}\text{H}_{19}\text{BrNO}_2\text{S}$  ( $\text{M}+\text{H}^+$ ) 392.0314, found 392.0318.

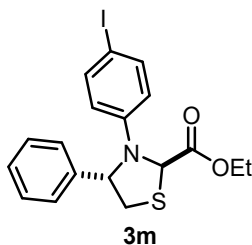

**Ethyl 3-(4-iodophenyl)-4-phenylthiazolidine-2-carboxylate (3m).** Purified by flash column chromatography (silica gel, PE/EA = 64/1 to 16/1 as eluent). White solid, 51 % yield, > 20:1 dr.  $^1\text{H}$  NMR (400 MHz,  $\text{CDCl}_3$ )  $\delta$  7.35-7.30 (m, 2H), 7.30-7.20 (m, 5H), 6.21-6.19 (m, 2H), 5.29 (s, 1H), 5.22 (d,  $J = 7.0$  Hz, 1H), 4.26-4.12 (m, 7.1 Hz, 2H), 3.95 (dd,  $J = 11.3, 7.2$  Hz, 1H), 2.85 (dd,  $J = 11.3, 1.0$  Hz, 1H), 1.25 (t,  $J = 7.1$  Hz, 3H);  $^{13}\text{C}$  NMR (101 MHz,  $\text{CDCl}_3$ )  $\delta$  171.3, 144.0, 141.6, 138.0, 128.8, 127.9, 126.3, 115.9, 79.7, 65.9, 63.4, 62.0, 39.2, 14.3. HRMS (ESI) calcd for  $\text{C}_{18}\text{H}_{19}\text{INO}_2\text{S}$  ( $\text{M}+\text{H}^+$ ) 440.1076, found 440.1076.

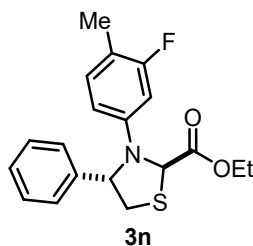

***Ethyl 3-(3-fluoro-4-methylphenyl)-4-phenylthiazolidine-2-carboxylate (3n)***. Purified by flash column chromatography (silica gel, PE/EA = 64/1 to 16/1 as eluent). White solid, 46 % yield, > 20:1 dr. <sup>1</sup>H NMR (400 MHz, CDCl<sub>3</sub>) δ 7.37-7.26 (m, 5H), 6.90 (t, *J* = 8.5 Hz, 1H), 6.21-6.11 (m, 2H), 5.34 (s, 1H), 5.26 (d, *J* = 7.1 Hz, 1H), 4.35-4.16 (m, 2H), 4.00 (dd, *J* = 11.3, 7.2 Hz, 1H), 2.89 (dd, *J* = 11.4, 1.1 Hz, 1H), 2.09 (d, *J* = 1.8 Hz, 3H), 1.30 (t, *J* = 7.1 Hz, 3H); <sup>13</sup>C NMR (101 MHz, CDCl<sub>3</sub>) δ 171.4, 161.9 (d, *J* = 243.3 Hz), 144.0 (d, *J* = 10.5 Hz), 142.0, 131.9 (d, *J* = 7.1 Hz), 128.8, 127.8, 126.4, 113.7 (d, *J* = 17.8 Hz), 109.1 (d, *J* = 2.8 Hz), 101.0 (d, *J* = 28.0 Hz), 66.0, 63.6, 61.9, 39.2, 14.3, 13.6 (d, *J* = 3.1 Hz). HRMS (ESI) calcd for C<sub>19</sub>H<sub>21</sub>FNO<sub>2</sub>S (M+H<sup>+</sup>) 346.1272, found 346.1274.

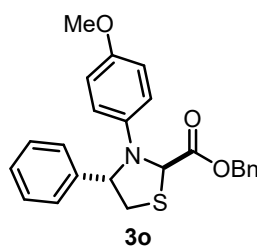

***Benzyl 3-(4-methoxyphenyl)-4-phenylthiazolidine-2-carboxylate (3o)***. Purified by flash column chromatography (silica gel, PE/EA = 64/1 to 16/1 as eluent). White solid, 73 % yield, > 20:1 dr. <sup>1</sup>H NMR (400 MHz, CDCl<sub>3</sub>) δ 7.33-7.17 (m, 10H), 6.65-6.56 (m, 2H), 6.44-6.34 (m, 2H), 5.38 (s, 1H), 5.22-5.18 (m, 1H), 5.19-5.07 (m, 2H), 3.89 (dd, *J* = 11.2, 7.2 Hz, 1H), 3.62 (s, 3H), 2.82 (dd, *J* = 11.2, 1.6 Hz, 1H); <sup>13</sup>C NMR (101 MHz, CDCl<sub>3</sub>) δ 171.7, 152.3, 142.5, 138.7, 135.6, 128.69, 128.67, 128.4, 128.2, 127.6, 126.4, 115.0, 114.9, 67.2, 66.0, 64.2, 55.7, 39.3. HRMS (ESI) calcd for C<sub>24</sub>H<sub>24</sub>NO<sub>3</sub>S (M+H<sup>+</sup>) 406.1471, found 406.1474.

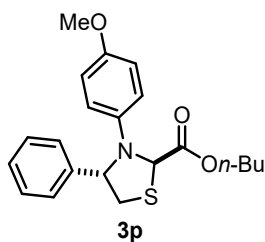

**Butyl 3-(4-methoxyphenyl)-4-phenylthiazolidine-2-carboxylate (3p).** Purified by flash column chromatography (silica gel, PE/EA = 64/1 to 16/1 as eluent). White solid, 77 % yield, > 20:1 dr. <sup>1</sup>H NMR (400 MHz, CDCl<sub>3</sub>) δ 7.29-7.16 (m, 5H), 6.68-6.59 (m, 2H), 6.44-6.34 (m, 2H), 5.32 (s, 1H), 5.19 (dd, *J* = 7.3, 1.5 Hz, 1H), 4.11-4.08 (m, 2H), 3.91 (dd, *J* = 11.2, 7.2 Hz, 1H), 3.61 (s, 3H), 2.83 (dd, *J* = 11.1, 1.5 Hz, 1H), 1.55 (m, 2H), 1.35-1.23 (m, 2H), 0.85 (t, *J* = 7.4 Hz, 3H); <sup>13</sup>C NMR (101 MHz, CDCl<sub>3</sub>) δ 172.0, 152.7, 142.6, 138.8, 128.7, 127.6, 126.5, 114.93, 114.91, 66.0, 65.5, 64.2, 55.7, 39.3, 30.7, 19.1, 13.8. HRMS (ESI) calcd for C<sub>21</sub>H<sub>26</sub>NO<sub>3</sub>S (M+H<sup>+</sup>) 372.1628, found 372.1625.

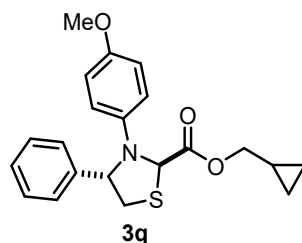

**Cyclopropylmethyl 3-(4-methoxyphenyl)-4-phenylthiazolidine-2-carboxylate (3q).** Purified by flash column chromatography (silica gel, PE/EA = 64/1 to 16/1 as eluent). Yellow solid, 86 % yield, > 20:1 dr. <sup>1</sup>H NMR (400 MHz, CDCl<sub>3</sub>) δ 7.26-7.16 (m, 5H), 6.67-6.60 (m, 2H), 6.43-6.37 (m, 2H), 5.33 (s, 1H), 5.19 (dd, *J* = 7.2, 1.5 Hz, 1H), 4.03-3.83 (m, 3H), 3.61 (s, 3H), 2.83 (dd, *J* = 11.2, 1.5 Hz, 1H), 1.20 (s, 1H), 1.13-1.01 (m, 1H), 0.53-0.45 (m, 2H), 0.25-0.17 (m, 2H); <sup>13</sup>C NMR (101 MHz, CDCl<sub>3</sub>) δ 172.0, 152.2, 142.6, 138.8, 128.7, 127.6, 126.5, 114.94, 114.88, 70.3, 66.0, 64.2, 55.7, 39.3, 9.9, 3.4, 3.4. HRMS (ESI) calcd for C<sub>21</sub>H<sub>24</sub>NO<sub>3</sub>S (M+H<sup>+</sup>) 370.1471, found 370.1475.

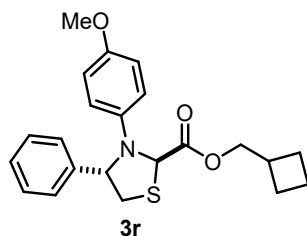

**Cyclobutylmethyl 3-(4-methoxyphenyl)-4-phenylthiazolidine-2-carboxylate (3r).** Purified by flash column chromatography (silica gel, PE/EA = 64/1 to 16/1 as eluent). White solid, 72 % yield, > 20:1 dr. <sup>1</sup>H NMR (400 MHz, CDCl<sub>3</sub>) δ 7.27-7.16 (m, 5H),



6.67-6.61 (m, 2H), 6.42-6.36 (m, 2H), 5.33 (s, 1H), 5.17 (dd,  $J = 7.3, 1.5$  Hz, 1H), 4.12-4.02 (m, 2H), 3.91 (dd,  $J = 11.1, 7.3$  Hz, 1H), 3.61 (s, 3H), 2.83 (dd,  $J = 11.2, 1.5$  Hz, 1H), 2.56 (hept,  $J = 7.3$  Hz, 1H), 2.01-1.89 (m, 2H), 1.88-1.59 (m, 4H), 1.39-1.17 (m, 1H);  $^{13}\text{C}$  NMR (101 MHz,  $\text{CDCl}_3$ )  $\delta$  172.2, 152.3, 142.6, 138.8, 128.7, 127.6, 126.5, 114.94, 114.90, 69.2, 66.0, 64.2, 55.7, 39.3, 34.2, 24.7, 24.7, 18.5. HRMS (ESI) calcd for  $\text{C}_{22}\text{H}_{26}\text{NO}_3\text{S}$  ( $\text{M}+\text{H}^+$ ) 384.1628, found 384.1627.

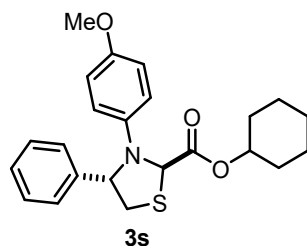

**Cyclohexyl 3-(4-methoxyphenyl)-4-phenylthiazolidine-2-carboxylate (3s).** Purified by flash column chromatography (silica gel, PE/EA = 64/1 to 16/1 as eluent). White solid, 80 % yield, > 20:1 dr.  $^1\text{H}$  NMR (400 MHz,  $\text{CDCl}_3$ )  $\delta$  7.38-7.26 (m, 5H), 6.75-6.68 (m, 2H), 6.50-6.44 (m, 2H), 5.38 (s, 1H), 5.25 (dd,  $J = 7.3, 1.5$  Hz, 1H), 4.88-4.82 (m, 1H), 4.00 (dd,  $J = 11.1, 7.3$  Hz, 1H), 3.69 (s, 3H), 2.90 (dd,  $J = 11.1, 1.5$  Hz, 1H), 1.90-1.82 (m, 1H), 1.81-1.68 (m, 2H), 1.65-1.49 (m, 3H), 1.45-1.28 (m, 4H);  $^{13}\text{C}$  NMR (101 MHz,  $\text{CDCl}_3$ )  $\delta$  171.3, 152.2, 142.6, 138.8, 128.6, 127.5, 126.4, 114.89, 114.85, 73.8, 66.0, 64.4, 55.6, 39.2, 31.5, 31.1, 25.3, 23.5, 23.3. HRMS (ESI) calcd for  $\text{C}_{23}\text{H}_{28}\text{NO}_3\text{S}$  ( $\text{M}+\text{H}^+$ ) 398.1784, found 398.1790.

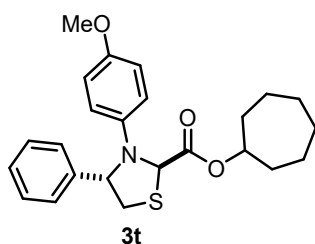

**Cycloheptyl 3-(4-methoxyphenyl)-4-phenylthiazolidine-2-carboxylate (3t).** Purified by flash column chromatography (silica gel, PE/EA = 64/1 to 16/1 as eluent). White solid, 78 % yield, > 20:1 dr.  $^1\text{H}$  NMR (400 MHz,  $\text{CDCl}_3$ )  $\delta$  7.27-7.16 (m, 5H), 6.68-6.59 (m, 2H), 6.43-6.34 (m, 2H), 5.28 (s, 1H), 5.16 (dd,  $J = 7.3, 1.5$  Hz, 1H), 4.94-4.88 (m, 1H), 3.91 (dd,  $J = 11.1, 7.3$  Hz, 1H), 3.61 (s, 3H), 2.81 (dd,  $J = 11.1, 1.5$  Hz, 1H), 1.88-1.83 (m, 1H), 1.75-1.31 (m, 12H);  $^{13}\text{C}$  NMR (101 MHz,  $\text{CDCl}_3$ )  $\delta$  171.3, 152.2, 142.7, 138.9, 128.7, 127.6, 126.4, 114.90, 114.87, 76.6, 66.1, 64.5, 55.7, 39.3, 33.9,

33.5, 28.30, 28.29, 23.0, 22.8. HRMS (ESI) calcd for C<sub>24</sub>H<sub>30</sub>NO<sub>3</sub>S (M+H<sup>+</sup>) 412.1941, found 412.1946.

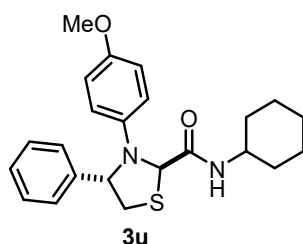

***N-cyclohexyl-3-(4-methoxyphenyl)-4-phenylthiazolidine-2-carboxamide (3u).***

Purified by flash column chromatography (silica gel, PE/EA = 64/1 to 16/1 as eluent). White solid, 60 % yield, > 20:1 dr. <sup>1</sup>H NMR (400 MHz, CDCl<sub>3</sub>) δ 7.30-7.22 (m, 3H), 7.16-7.10 (m, 2H), 6.72-6.66 (m, 2H), 6.52-6.46 (m, 2H), 6.17 (d, *J* = 8.7 Hz, 1H), 5.44 (d, *J* = 5.9 Hz, 1H), 5.19 (s, 1H), 3.83-3.73 (m, 2H), 3.68 (s, 3H), 2.93 (dd, *J* = 11.3, 1.3 Hz, 1H), 1.91 (dd, *J* = 12.6, 4.3 Hz, 1H), 1.83-1.72 (m, 1H), 1.72-1.52 (m, 3H), 1.43-1.27 (m, 2H), 1.19-1.04 (m, 2H), 1.03-0.84 (m, 1H); <sup>13</sup>C NMR (101 MHz, CDCl<sub>3</sub>) δ 170.5, 152.8, 140.4, 138.0, 128.5, 127.7, 126.9, 116.2, 114.8, 66.8, 66.7, 55.6, 48.3, 38.5, 33.1, 32.8, 25.5, 24.9, 24.7. HRMS (ESI) calcd for C<sub>23</sub>H<sub>29</sub>N<sub>2</sub>O<sub>2</sub>S (M+H<sup>+</sup>) 397.1944, found 397.1949.

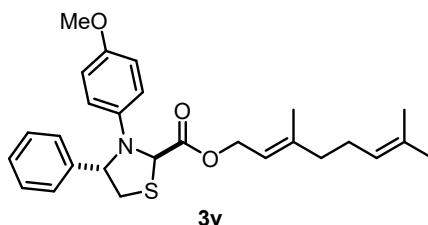

***2-(((E)-3,7-dimethylocta-2,6-dien-1-yl)oxy)-1-((2R,4S)-3-(4-methoxyphenyl)-4-phenylthiazolidin-2-yl)ethan-1-one (3v).*** Purified by flash column chromatography (silica gel, PE/EA = 64/1 to 16/1 as eluent). White solid, 78% yield, > 20:1 dr. <sup>1</sup>H NMR (400 MHz, CDCl<sub>3</sub>) δ 7.35-7.22 (m, 5H), 6.74-6.67 (m, 2H), 6.48-6.42 (m, 2H), 5.40-5.29 (m, 2H), 5.26 (dd, *J* = 7.3, 1.5 Hz, 1H), 5.12-5.08 (m, 1H), 4.77-4.59 (m, 2H), 3.98 (dd, *J* = 11.1, 7.2 Hz, 1H), 3.68 (s, 3H), 2.89 (dd, *J* = 11.2, 1.5 Hz, 1H), 2.16-2.01 (m, 4H), 1.70 (dd, *J* = 3.6, 1.4 Hz, 6H), 1.62 (d, *J* = 1.3 Hz, 3H); <sup>13</sup>C NMR (101 MHz, CDCl<sub>3</sub>) δ 171.9, 152.3, 143.4, 142.6, 138.8, 132.0, 128.7, 127.6, 126.5, 123.8, 117.8, 115.0, 114.9, 66.0, 64.1, 62.5, 55.7, 39.6, 39.3, 26.4, 25.8, 17.8, 16.7. HRMS (ESI) calcd for C<sub>27</sub>H<sub>34</sub>NO<sub>3</sub>S (M+H<sup>+</sup>) 452.2254, found 452.2255.

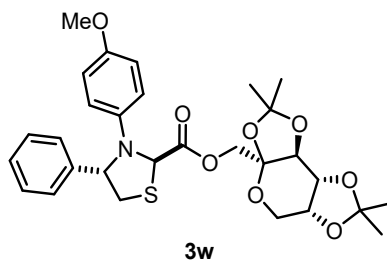

***((3a*S*,5a*R*,8a*R*,8b*S*)-2,2,7,7-tetramethyltetrahydro-3a*H*-bis([1,3]dioxolo)[4,5-*b*:4',5'-*d*]pyran-3a-yl)methyl (2*R*,4*S*)-3-(4-methoxyphenyl)-4-phenylthiazolidine-2-carboxylate (3w)***. Purified by flash column chromatography (silica gel, PE/EA = 64/1 to 16/1 as eluent). White solid, 56% yield, 14:11 dr. <sup>1</sup>H NMR (400 MHz, CDCl<sub>3</sub>) δ 7.33-7.10 (m, 5H), 6.75-6.58 (m, 2H), 6.46-6.35 (m, 2H), 5.35 (d, *J* = 4.1 Hz, 1H), 5.25-5.20 (m, 2H), 4.33-4.16 (m, 1H), 4.35-4.14 (m, 4H), 3.97-3.85 (m, 2H), 3.74 (dd, *J* = 13.0, 1.9 Hz, 1H), 3.63 (s, 3H), 2.85 (dd, *J* = 11.2, 1.6 Hz, 1H), 1.51 (d, *J* = 10.9 Hz, 3H), 1.46-1.39 (m, 4H), 1.35-1.28 (m, 4H); <sup>13</sup>C NMR (101 MHz, CDCl<sub>3</sub>) δ 171.1, 152.5, 142.3, 138.5, 128.7, 127.6, 126.5, 115.4, 115.1, 115.0, 114.9, 109.3, 109.0, 101.5, 70.9, 70.6, 70.2, 66.7, 66.0, 63.9, 61.5, 55.7, 39.3, 26.7, 26.1, 25.6, 24.3. HRMS (ESI) calcd for C<sub>29</sub>H<sub>36</sub>NO<sub>8</sub>S (M+H<sup>+</sup>) 558.2156, found 558.2158.

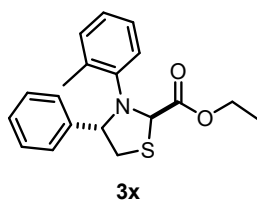

***Ethyl 4-phenyl-3-(o-tolyl)thiazolidine-2-carboxylate (3x)***. Purified by flash column chromatography (silica gel, PE/EA = 64/1 to 16/1 as eluent). White solid, 40% yield, > 20:1 dr. <sup>1</sup>H NMR (400 MHz, CDCl<sub>3</sub>) δ 7.36-7.27 (m, 2H), 7.27-7.06 (m, 5H), 6.96 (dtd, *J* = 18.4, 7.4, 1.7 Hz, 2H), 5.52 (dd, *J* = 8.6, 6.4 Hz, 1H), 5.27 (s, 1H), 4.21-3.99 (m, 2H), 3.58 (dd, *J* = 10.0, 6.4 Hz, 1H), 3.16 (dd, *J* = 10.0, 8.6 Hz, 1H), 2.40 (s, 3H), 1.20 (t, *J* = 7.1 Hz, 3H); <sup>13</sup>C NMR (101 MHz, CDCl<sub>3</sub>) δ 171.4, 142.2, 140.0, 134.3, 130.7, 128.4, 127.6, 127.5, 125.8, 125.0, 124.6, 66.5, 64.3, 61.0, 38.9, 18.2, 14.0. HRMS (ESI) calcd for C<sub>19</sub>H<sub>21</sub>NO<sub>2</sub>S(M+Na<sup>+</sup>) 350.1185, found 350.1184.

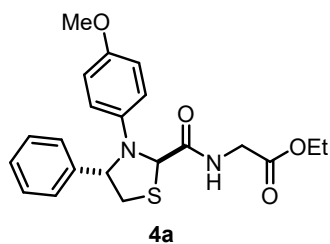

**Ethyl (3-(4-methoxyphenyl)-4-phenylthiazolidine-2-carbonyl)glycinate (4a).** Purified by flash column chromatography (silica gel, PE/EA = 16/1 to 6/1 as eluent). White solid, 70% yield, > 20:1 dr. <sup>1</sup>H NMR (400 MHz, CDCl<sub>3</sub>) δ 7.32-7.27 (m, 1H), 7.25-7.21 (m, 1H), 7.17-7.12 (m, 2H), 6.88 (dd, *J* = 6.7, 4.4 Hz, 1H), 6.73-6.67 (m, 2H), 6.54-6.48 (m, 2H), 5.47 (dd, *J* = 6.1, 1.5 Hz, 1H), 5.27 (s, 1H), 4.26-4.15 (m, 3H), 3.91-3.82 (m, 2H), 2.95 (dd, *J* = 11.3, 1.5 Hz, 1H), 1.26 (t, *J* = 7.2 Hz, 3H); <sup>13</sup>C NMR (101 MHz, CDCl<sub>3</sub>) δ 171.9, 169.7, 152.9, 140.4, 137.9, 128.5, 127.7, 127.0, 116.2, 114.8, 66.9, 66.4, 61.7, 55.6, 41.4, 38.6, 14.2. HRMS (ESI) calcd for C<sub>21</sub>H<sub>25</sub>N<sub>2</sub>O<sub>4</sub>S (M+H<sup>+</sup>) 401.1530, found 401.1531.

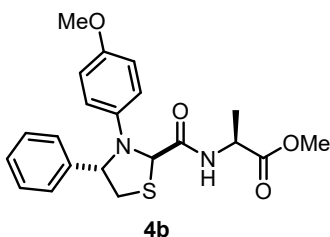

**Methyl (3-(4-methoxyphenyl)-4-phenylthiazolidine-2-carbonyl)-L-alaninate (4b).** Purified by flash column chromatography (silica gel, PE/EA = 16/1 to 6/1 as eluent). White solid, 50% yield, 5:3 dr. <sup>1</sup>H NMR (400 MHz, CDCl<sub>3</sub>) δ 7.31-7.26 (m, 2H), 7.26-7.21 (m, 1H), 7.15 (dt, *J* = 7.8, 1.8 Hz, 2H), 6.83 (d, *J* = 8.0 Hz, 1H), 6.77-6.64 (m, 2H), 6.56-6.46 (m, 2H), 5.50-5.43 (m, 1H), 5.23 (d, *J* = 2.0 Hz, 1H), 4.73-4.53 (m, 1H), 3.88-3.77 (m, 1H), 3.76 (s, 2H), 3.68 (d, *J* = 1.8 Hz, 3H), 3.66 (s, 1H), 2.95 (dd, *J* = 11.3, 1.7 Hz, 1H), 1.44 (d, *J* = 7.2 Hz, 1H), 1.31 (d, *J* = 7.2 Hz, 2H); <sup>13</sup>C NMR (101 MHz, CDCl<sub>3</sub>) δ 173.5, 170.9, 153.0, 140.4, 137.9, 128.5, 127.7, 126.3, 116.3, 114.8, 66.9, 66.6, 55.6, 52.7, 48.1, 38.5, 18.5. HRMS (ESI) calcd for C<sub>21</sub>H<sub>25</sub>N<sub>2</sub>O<sub>4</sub>S (M+H<sup>+</sup>) 401.1530, found 401.1526.

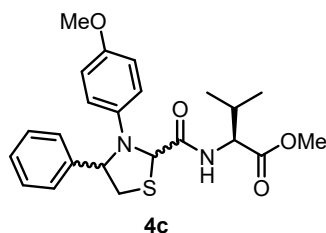

**Methyl (3-(4-methoxyphenyl)-4-phenylthiazolidine-2-carbonyl)-L-valinate (4c).**

Purified by flash column chromatography (silica gel, PE/EA = 16/1 to 6/1 as eluent). White solid, 70% yield, 1:1 dr. <sup>1</sup>H NMR (400 MHz, CDCl<sub>3</sub>) δ 7.27-7.22 (m, 2H), 7.26-7.20 (m, 1H), 7.16-7.13 (m, 2H), 5.74-5.45 (m, 1H), 6.74-6.65 (m, 2H), 6.57-6.49 (m, 2H), 5.54-5.45 (m, 1H), 5.27 (d, *J* = 13.0 Hz, 1H), 4.72-4.53 (m, 1H), 3.92-3.76 (m, 1H), 3.75 (s, 2H), 3.68 (d, *J* = 1.8 Hz, 3H), 3.59 (s, 1H), 2.97-2.93 (m, 1H), 2.27-2.17 (m, 1H), 0.98-0.90 (m, 3H), 0.80-0.61 (m, 3H); <sup>13</sup>C NMR (101 MHz, CDCl<sub>3</sub>) δ 172.6, 171.9, 171.8, 171.0, 153.02, 152.98, 140.5, 137.9, 137.8, 128.5, 127.7, 126.96, 126.95, 116.5, 116.2, 114.9, 114.8, 66.9, 66.7, 66.5, 57.1, 57.0, 55.7, 55.6, 52.4, 52.2, 38.7, 38.4, 31.7, 31.6, 29.8, 19.2, 19.1, 17.9, 17.3. HRMS (ESI) calcd for C<sub>23</sub>H<sub>29</sub>N<sub>2</sub>O<sub>4</sub>S (M+H<sup>+</sup>) 429.1843, found 429.1840.

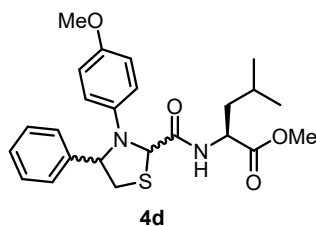

**Methyl (3-(4-methoxyphenyl)-4-phenylthiazolidine-2-carbonyl)-L-leucinate (4d).**

Purified by flash column chromatography (silica gel, PE/EA = 16/1 to 6/1 as eluent). White solid, 58% yield, 1:1 dr. <sup>1</sup>H NMR (400 MHz, CDCl<sub>3</sub>) δ 7.30-7.19 (m, 4H), 7.16-7.10 (m, 2H), 6.70-6.65 (m, 2H), 6.52-6.47 (m, 2H), 5.49-5.42 (m, 1H), 5.23 (d, *J* = 8.1 Hz, 1H), 4.71-4.60 (m, 1H), 3.90-3.68 (m, 3H), 3.66 (s, 3H), 3.58 (s, 2H), 2.95-2.91 (m, 1H), 1.73-1.61 (m, 1H), 1.60-1.50 (m, 1H), 1.44-1.29 (m, 1H), 0.93 (dd, *J* = 6.0, 1.4 Hz, 3H), 0.84 (d, *J* = 6.4 Hz, 2H), 0.74 (d, *J* = 6.5 Hz, 1H); <sup>13</sup>C NMR (101 MHz, CDCl<sub>3</sub>) δ 173.4, 172.7, 171.6, 171.0, 152.88, 152.86, 140.4, 140.3, 137.8, 137.7, 128.4, 127.60, 127.57, 126.9, 116.4, 116.1, 114.7, 114.6, 66.8, 66.7, 66.42, 66.37, 55.6, 55.5, 52.4, 52.2, 50.7, 50.5, 41.6, 41.5, 38.6, 38.4, 25.0, 24.6, 22.9, 22.8, 21.9, 21.6. HRMS (ESI) calcd for C<sub>24</sub>H<sub>31</sub>NO<sub>4</sub>S (M+H<sup>+</sup>) 443.1999, found 443.2004.

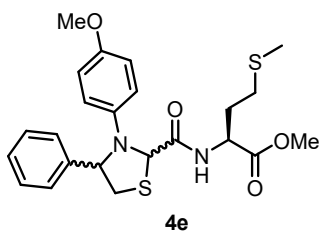

**Methyl ((2R,4R)-3-(4-methoxyphenyl)-4-phenylthiazolidine-2-carbonyl)-L-methioninate (4e).** Purified by flash column chromatography (silica gel, PE/EA = 32/1 to 8/1 as eluent). White solid, 68% yield, 1:1 dr.  $^1\text{H}$  NMR (400 MHz,  $\text{CDCl}_3$ )  $\delta$  7.31-7.22 (m, 3H), 7.17-7.14 (m, 2H), 6.75-6.66 (m, 2H), 6.56-6.47 (m, 2H), 5.49 (t,  $J = 5.6$  Hz, 1H), 5.25 (d,  $J = 7.7$  Hz, 1H), 4.82-4.62 (m, 1H), 3.93-3.78 (m, 1H), 3.76 (s, 1H), 3.68 (s, 3H), 3.65 (s, 2H), 2.98-2.94 (m, 1H), 2.59-2.44 (m, 1H), 2.30-2.21 (m, 1H), 2.14-1.98 (m, 3H), 1.97-1.82 (m, 2H);  $^{13}\text{C}$  NMR (101 MHz,  $\text{CDCl}_3$ )  $\delta$  172.4, 171.9, 171.8, 171.2, 153.0, 140.5, 140.4, 137.9, 137.8, 128.5, 127.73, 127.70, 126.93, 126.92, 116.5, 116.0, 114.9, 114.8, 66.8, 66.7, 66.44, 66.35, 55.7, 55.6, 52.8, 52.6, 51.8, 51.6, 38.7, 38.5, 31.3, 31.0, 30.1, 29.7, 15.7, 15.2. HRMS (ESI) calcd for  $\text{C}_{23}\text{H}_{29}\text{N}_2\text{O}_4\text{S}_2$  ( $\text{M}+\text{H}^+$ ) 461.1563, found 461.1568.

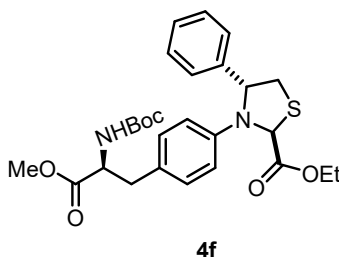

**Ethyl 3-(4-(2-((tert-butoxycarbonyl)amino)-3-methoxy-3-oxopropyl)phenyl)-4-phenylthiazolidine-2-carboxylate (4f).** Purified by flash column chromatography (silica gel, PE/EA = 32 to 8/1 as eluent). White solid, 40% yield, > 20:1 dr.  $^1\text{H}$  NMR (400 MHz,  $\text{CDCl}_3$ )  $\delta$  7.37-7.26 (m, 5H), 6.86 (dd,  $J = 8.3, 5.1$  Hz, 2H), 6.39 (dd,  $J = 8.8, 2.2$  Hz, 2H), 5.35 (d,  $J = 2.3$  Hz, 1H), 5.28 (d,  $J = 7.0$  Hz, 1H), 4.88 (t,  $J = 9.3$  Hz, 1H), 4.46 (p,  $J = 6.7, 5.9$  Hz, 1H), 4.32-4.16 (m, 2H), 3.99 (dd,  $J = 11.3, 7.1$  Hz, 1H), 3.65 (d,  $J = 3.2$  Hz, 3H), 2.89 (t,  $J = 9.5$  Hz, 2H), 1.39 (s, 9H), 1.30-1.29 (m, 3H);  $^{13}\text{C}$  NMR (101 MHz,  $\text{CDCl}_3$ )  $\delta$  172.8, 172.6, 171.7, 143.4, 142.3, 130.3, 128.7, 127.7, 126.4, 125.0, 113.7, 80.0, 65.9, 63.6, 61.8, 54.6, 52.3, 39.3, 29.8, 28.4, 14.3. HRMS (ESI) calcd for  $\text{C}_{27}\text{H}_{35}\text{N}_2\text{O}_6\text{S}$  ( $\text{M}+\text{H}^+$ ) 515.2210, found 515.2206.

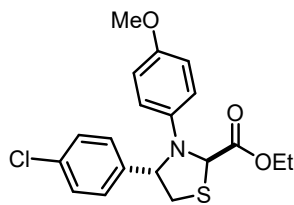

**5a**

***Ethyl 4-(4-chlorophenyl)-3-(4-methoxyphenyl)thiazolidine-2-carboxylate (5a).***

Purified by flash column chromatography (silica gel, PE/EA = 64/1 to 16/1 as eluent). Yellow solid, 70% yield, > 20:1 dr. <sup>1</sup>H NMR (400 MHz, CDCl<sub>3</sub>) δ 7.56 (d, *J* = 8.4 Hz, 2H), 7.28 (d, *J* = 8.5 Hz, 2H), 6.75-6.68 (m, 2H), 6.52-6.44 (m, 2H), 5.12 (s, 1H), 5.00 (dd, *J* = 10.0, 5.6 Hz, 1H), 4.34 (q, *J* = 7.1 Hz, 2H), 3.69 (s, 3H), 3.43 (dd, *J* = 11.7, 10.0 Hz, 1H), 3.33 (dd, *J* = 11.7, 5.6 Hz, 1H), 1.37 (t, *J* = 7.1 Hz, 3H); <sup>13</sup>C NMR (101 MHz, CDCl<sub>3</sub>) δ 172.4, 153.0, 140.1, 139.8, 133.5, 129.2, 128.2, 116.0, 114.6, 69.1, 67.3, 62.0, 55.7, 40.1, 14.3. HRMS (ESI) calcd for C<sub>19</sub>H<sub>21</sub>ClNO<sub>3</sub>S (M+H<sup>+</sup>) 378.0925, found 378.0922.

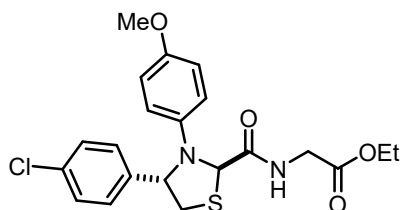

**5b**

***Ethyl (4-(4-chlorophenyl)-3-(4-methoxyphenyl)thiazolidine-2-carbonyl)glycinate (5b).***

Purified by flash column chromatography (silica gel, PE/EA = 32/1 to 8/1 as eluent). Yellow solid, 57% yield, > 20:1 dr. <sup>1</sup>H NMR (400 MHz, CDCl<sub>3</sub>) δ 7.24 (d, *J* = 8.4 Hz, 2H), 7.09 (d, *J* = 8.4 Hz, 2H), 6.89-6.84 (m, 1H), 6.70 (d, *J* = 9.1 Hz, 2H), 6.48 (d, *J* = 9.1 Hz, 2H), 5.42 (d, *J* = 6.0 Hz, 1H), 5.25 (s, 1H), 4.25-4.11 (m, 3H), 3.90-3.82 (m, 2H), 3.67 (s, 3H), 2.89 (dd, *J* = 11.5, 1.4 Hz, 1H), 1.25 (t, *J* = 7.1 Hz, 3H); <sup>13</sup>C NMR (101 MHz, CDCl<sub>3</sub>) δ 171.7, 169.8, 153.0, 139.0, 137.6, 133.5, 128.7, 128.4, 116.2, 114.9, 66.20, 66.19, 61.8, 55.6, 41.5, 38.5, 14.2. HRMS (ESI) calcd for C<sub>21</sub>H<sub>23</sub>ClN<sub>2</sub>O<sub>4</sub>SNa (M+Na<sup>+</sup>) 457.0959, found 457.0960.

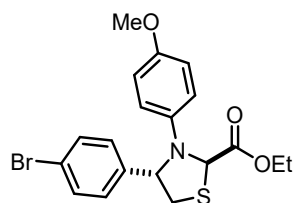

**5c**

**Ethyl 4-(4-bromophenyl)-3-(4-methoxyphenyl)thiazolidine-2-carboxylate (5c).**

Purified by flash column chromatography (silica gel, PE/EA = 32/1 to 8/1 as eluent). Yellow solid, 69% yield, > 20:1 dr. <sup>1</sup>H NMR (400 MHz, CDCl<sub>3</sub>) δ 7.49-7.41 (m, 2H), 7.25-7.17 (m, 2H), 6.76-6.68 (m, 2H), 6.48-6.39 (m, 2H), 5.36 (d, *J* = 1.2 Hz, 1H), 5.21 (d, *J* = 7.2 Hz, 1H), 4.30-4.13 (m, 2H), 3.96 (dd, *J* = 11.2, 7.2 Hz, 1H), 3.69 (d, *J* = 1.2 Hz, 3H), 2.85 (dd, *J* = 11.3, 1.6 Hz, 1H), 1.26-1.30 (m, 3H); <sup>13</sup>C NMR (101 MHz, CDCl<sub>3</sub>) δ 171.6, 152.4, 141.7, 138.4, 131.8, 128.2, 121.4, 114.9, 65.4, 64.0, 61.8, 55.7, 39.1, 14.3. HRMS (ESI) calcd for C<sub>19</sub>H<sub>21</sub>BrNO<sub>3</sub>S (M+H<sup>+</sup>) 422.0420, found 422.0423.

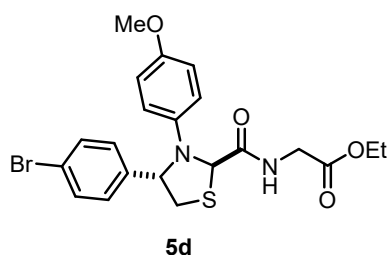

**Ethyl (4-(4-bromophenyl)-3-(4-methoxyphenyl)thiazolidine-2-carbonyl)glycinate (5d).**

Purified by flash column chromatography (silica gel, PE/EA = 32/1 to 8/1 as eluent). Yellow solid, 53% yield, > 20:1 dr. <sup>1</sup>H NMR (400 MHz, CDCl<sub>3</sub>) δ 7.44-7.38 (m, 2H), 7.06-6.99 (m, 2H), 6.81 (dd, *J* = 6.7, 4.2 Hz, 1H), 6.73-6.68 (m, 2H), 6.52-6.44 (m, 2H), 5.41 (d, *J* = 5.9 Hz, 1H), 5.24 (s, 1H), 4.27-4.14 (m, 3H), 3.93-3.81 (m, 2H), 3.68 (s, 3H), 2.90 (dd, *J* = 11.5, 1.4 Hz, 1H), 1.25 (t, *J* = 7.2 Hz, 3H); <sup>13</sup>C NMR (101 MHz, CDCl<sub>3</sub>) δ 171.6, 169.7, 153.0, 139.5, 137.6, 131.7, 128.7, 121.6, 116.2, 114.9, 66.24, 66.19, 61.8, 55.6, 41.4, 38.4, 14.2. HRMS (ESI) calcd for C<sub>21</sub>H<sub>24</sub>BrN<sub>2</sub>O<sub>4</sub>S (M+H<sup>+</sup>) 479.0635, found 479.0636.

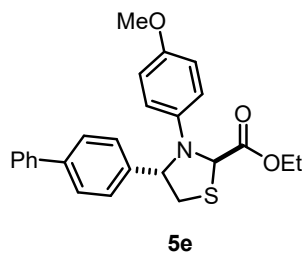

**Ethyl 4-([1,1'-biphenyl]-4-yl)-3-(4-methoxyphenyl)thiazolidine-2-carboxylate (5e).**

Purified by flash column chromatography (silica gel, PE/EA = 64/1 to 16/1 as eluent). Yellow solid, 87% yield, > 20:1 dr. <sup>1</sup>H NMR (400 MHz, CDCl<sub>3</sub>) δ 7.57 (t, *J* = 7.8 Hz, 4H), 7.45-7.39 (q, *J* = 7.9 Hz, 4H), 7.37-7.31 (m, 1H), 6.75 (d, *J* = 9.0 Hz, 2H), 6.51 (d, *J* = 9.1 Hz, 2H), 5.42 (s, 1H), 5.32 (d, *J* = 7.0 Hz, 1H), 4.33-4.17 (m, 2H), 4.02 (dd, *J* = 11.2, 7.2 Hz, 1H), 3.70 (s, 3H), 2.95 (dd, *J* = 11.2, 1.5 Hz, 1H), 1.30 (t, *J* = 7.1 Hz,



3H);  $^{13}\text{C}$  NMR (101 MHz,  $\text{CDCl}_3$ )  $\delta$  171.8, 152.3, 141.6, 140.9, 140.5, 138.8, 128.9, 127.44, 127.37, 127.2, 126.9, 114.99, 114.96, 65.8, 64.1, 61.7, 55.7, 39.3, 14.3. HRMS (ESI) calcd for  $\text{C}_{25}\text{H}_{26}\text{NO}_3\text{S}$  ( $\text{M}+\text{H}^+$ ) 420.1628, found 420.1630.

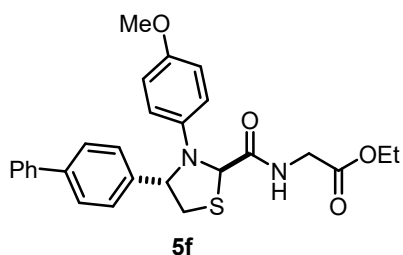

**Ethyl 3-(4-((1,1'-biphenyl)-4-yl)-3-(4-methoxyphenyl)thiazolidine-2-carbonyl)glycinate (5f).** Purified by flash column chromatography (silica gel, PE/EA = 32/1 to 8/1 as eluent). Yellow solid, 52% yield, > 20:1 dr.  $^1\text{H}$  NMR (400 MHz,  $\text{CDCl}_3$ )  $\delta$  7.58-7.48 (m, 4H), 7.45-7.38 (m, 2H), 7.37-7.29 (m, 1H), 7.21 (d,  $J = 8.3$  Hz, 2H), 6.84 (dd,  $J = 6.7, 4.1$  Hz, 1H), 6.76-6.70 (m, 2H), 6.59-6.52 (m, 2H), 5.53 (d,  $J = 5.8$  Hz, 1H), 5.30 (s, 1H), 4.30-4.23 (m, 1H), 4.20 (q,  $J = 7.2$  Hz, 2H), 3.95-3.82 (m, 2H), 3.69 (s, 3H), 3.00 (dd,  $J = 11.4, 1.4$  Hz, 1H), 1.27 (t,  $J = 7.1$  Hz, 3H);  $^{13}\text{C}$  NMR (101 MHz,  $\text{CDCl}_3$ )  $\delta$  171.8, 169.8, 152.9, 140.7, 140.6, 139.3, 137.9, 128.9, 127.5, 127.4, 127.24, 127.15, 116.2, 114.9, 66.6, 66.4, 61.8, 55.6, 41.5, 38.7, 14.3. HRMS (ESI) calcd for  $\text{C}_{27}\text{H}_{29}\text{N}_2\text{O}_4\text{S}$  ( $\text{M}+\text{H}^+$ ) 477.1843, found 477.1848.

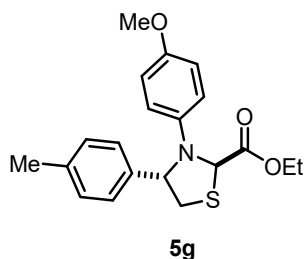

**Ethyl 3-(4-methoxyphenyl)-4-(p-tolyl)thiazolidine-2-carboxylate (5g).** Purified by flash column chromatography (silica gel, PE/EA = 64/1 to 16/1 as eluent). Colourless oil, 82% yield, > 20:1 dr.  $^1\text{H}$  NMR (400 MHz,  $\text{CDCl}_3$ )  $\delta$  7.49 (d,  $J = 8.1$  Hz, 2H), 7.12 (d,  $J = 7.9$  Hz, 2H), 6.74-6.66 (m, 2H), 6.55-6.46 (m, 2H), 5.12 (s, 1H), 4.99 (dd,  $J = 10.1, 5.5$  Hz, 1H), 4.34 (q,  $J = 7.1$  Hz, 2H), 3.68 (s, 3H), 3.50-3.44 (m, 1H), 3.33 (dd,  $J = 11.7, 5.5$  Hz, 1H), 2.31 (s, 3H), 1.38 (t,  $J = 7.1$  Hz, 3H);  $^{13}\text{C}$  NMR (101 MHz,  $\text{CDCl}_3$ )  $\delta$  172.5, 152.9, 140.6, 138.1, 137.5, 129.7, 126.7, 116.0, 114.6, 69.6, 67.4, 61.9, 55.7, 40.3, 21.3, 14.3. HRMS (ESI) calcd for  $\text{C}_{20}\text{H}_{23}\text{NO}_3\text{SNa}$  ( $\text{M}+\text{Na}^+$ ) 380.1291, found 380.1292.

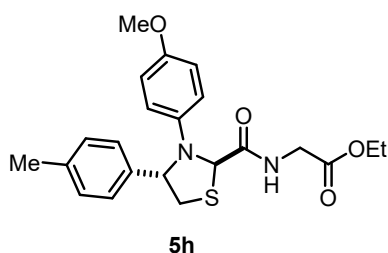

***Ethyl 3-(4-methoxyphenyl)-4-(p-tolyl)thiazolidine-2-carboxylate (5h).***

Purified by flash column chromatography (silica gel, PE/EA = 32/1 to 8/1 as eluent). White solid, 66% yield, > 20:1 dr. <sup>1</sup>H NMR (400 MHz, CDCl<sub>3</sub>) δ 7.08 (d, *J* = 8.0 Hz, 2H), 7.02 (d, *J* = 8.2 Hz, 2H), 6.89-6.85 (m, 1H), 6.73-6.67 (m, 2H), 6.55-6.48 (m, 2H), 5.44 (dd, *J* = 6.1, 1.4 Hz, 1H), 5.25 (s, 1H), 4.29-4.21 (m, 1H), 4.20-4.15 (m, 2H), 3.92-3.81 (m, 2H), 3.68 (s, 3H), 2.92 (dd, *J* = 11.4, 1.5 Hz, 1H), 2.30 (s, 3H), 1.26 (t, *J* = 7.1 Hz, 3H); <sup>13</sup>C NMR (101 MHz, CDCl<sub>3</sub>) δ 171.9, 169.7, 152.9, 138.0, 137.4, 137.3, 129.2, 126.9, 116.3, 114.8, 66.7, 66.4, 61.7, 55.6, 41.5, 38.7, 21.2, 14.2. HRMS (ESI) calcd for C<sub>22</sub>H<sub>27</sub>N<sub>2</sub>O<sub>4</sub>S (M+H<sup>+</sup>) 415.1686, found 415.1691.

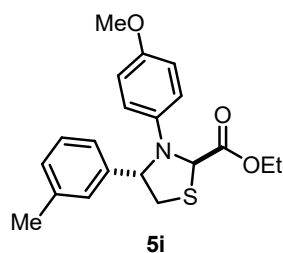

***Ethyl 3-(4-methoxyphenyl)-4-(m-tolyl)thiazolidine-2-carboxylate (5i).*** Purified by flash column chromatography (silica gel, PE/EA = 64/1 to 16/1 as eluent). White solid, 85% yield, > 20:1 dr. <sup>1</sup>H NMR (400 MHz, CDCl<sub>3</sub>) δ 7.38-7.26 (m, 2H), 7.21 (dd, *J* = 16.4, 7.6 Hz, 2H), 6.87-6.80 (m, 2H), 6.61-6.55 (m, 2H), 5.49 (s, 1H), 5.34 (dd, *J* = 7.3, 1.5 Hz, 1H), 4.42-4.27 (m, 2H), 4.08 (dd, *J* = 11.1, 7.2 Hz, 1H), 3.80 (s, 3H), 3.00 (dd, *J* = 11.2, 1.5 Hz, 1H), 2.45 (s, 3H), 1.40 (t, *J* = 7.1 Hz, 3H); <sup>13</sup>C NMR (101 MHz, CDCl<sub>3</sub>) δ 171.9, 152.2, 142.6, 138.8, 138.3, 128.5, 128.4, 127.0, 123.6, 114.9, 66.0, 64.1, 61.6, 55.6, 39.3, 21.7, 14.3. HRMS (ESI) calcd for C<sub>20</sub>H<sub>24</sub>NO<sub>3</sub>S (M+H<sup>+</sup>) 358.1471, found 358.1472.

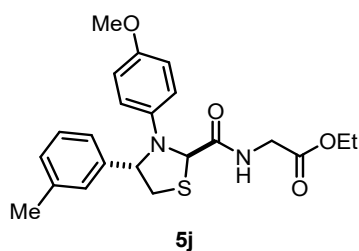

**Ethyl 3-(4-methoxyphenyl)-4-(*m*-tolyl)thiazolidine-2-carboxylate (5j).**

Purified by flash column chromatography (silica gel, PE/EA = 32/1 to 8/1 as eluent). White solid, 61% yield, > 20:1 dr. <sup>1</sup>H NMR (400 MHz, CDCl<sub>3</sub>) δ 7.43 (t, *J* = 7.6 Hz, 1H), 7.33 (d, *J* = 7.6 Hz, 1H), 7.19 (d, *J* = 7.7 Hz, 1H), 7.13 (dd, *J* = 6.6, 4.3 Hz, 1H), 7.03-6.95 (m, 2H), 6.83-6.76 (m, 2H), 5.71 (d, *J* = 6.0 Hz, 1H), 5.55 (s, 1H), 4.59-4.41 (m, 3H), 4.23-4.09 (m, 2H), 3.96 (s, 3H), 3.22 (dd, *J* = 11.4, 1.4 Hz, 1H), 2.59 (s, 3H), 1.54 (t, *J* = 7.2 Hz, 3H); <sup>13</sup>C NMR (101 MHz, CDCl<sub>3</sub>) δ 172.0, 169.8, 152.8, 140.4, 138.1, 138.0, 128.5, 128.3, 127.5, 124.1, 116.1, 114.8, 66.8, 66.3, 61.7, 55.6, 41.5, 38.6, 21.7, 14.2. HRMS (ESI) calcd for C<sub>22</sub>H<sub>27</sub>N<sub>2</sub>O<sub>4</sub>S (M+H<sup>+</sup>) 415.1686, found 415.1687.

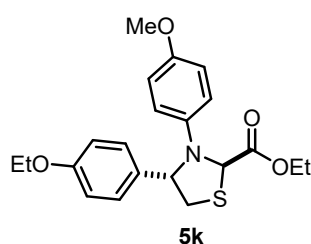

**Ethyl 4-(4-ethoxyphenyl)-3-(4-methoxyphenyl)thiazolidine-2-carboxylate (5k).**

Purified by flash column chromatography (silica gel, PE/EA = 64/1 to 16/1 as eluent). White solid, 82% yield, > 20:1 dr. <sup>1</sup>H NMR (400 MHz, CDCl<sub>3</sub>) δ 7.22 (d, *J* = 8.6 Hz, 2H), 6.83 (d, *J* = 8.6 Hz, 2H), 6.71 (d, *J* = 9.0 Hz, 2H), 6.45 (d, *J* = 9.0 Hz, 2H), 5.34 (s, 1H), 5.21 (dd, *J* = 7.1, 1.5 Hz, 1H), 4.27-4.15 (m, 2H), 4.02-3.90 (m, 3H), 3.68 (s, 3H), 2.86 (dd, *J* = 11.0, 1.6 Hz, 1H), 1.39 (t, *J* = 7.0 Hz, 3H), 1.27 (t, *J* = 7.1 Hz, 3H); <sup>13</sup>C NMR (101 MHz, CDCl<sub>3</sub>) δ 171.9, 158.4, 152.2, 138.8, 134.3, 127.5, 115.0, 114.9, 114.6, 65.5, 64.0, 63.5, 61.7, 55.7, 39.5, 15.0, 14.3. HRMS (ESI) calcd for C<sub>21</sub>H<sub>26</sub>NO<sub>4</sub>S (M+H<sup>+</sup>) 388.1577, found 388.1582.

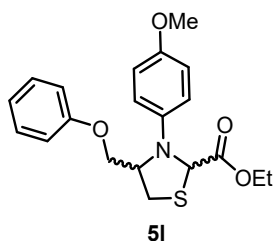

**Ethyl 3-(4-methoxyphenyl)-4-(phenoxymethyl)thiazolidine-2-carboxylate (5l).**

Purified by flash column chromatography (silica gel, PE/EA = 64/1 to 16/1 as eluent). White solid, 70% yield, 11:9 dr. <sup>1</sup>H NMR (400 MHz, CDCl<sub>3</sub>) δ 7.27-7.20 (m, 2H), 7.08-6.48 (m, 7H), 5.11 (s, 1H), 4.29-4.07 (m, 3H), 4.06-3.85 (m, 4H), 3.71 (d, *J* = 6.6 Hz, 3H), 1.70-1.25 (m, 3H); <sup>13</sup>C NMR (101 MHz, CDCl<sub>3</sub>) δ 171.8, 158.5, 153.9, 141.1,

129.7, 121.3, 116.9, 114.9, 114.7, 70.2, 65.4, 61.7, 55.7, 53.7, 46.0, 14.2. HRMS (ESI) calcd for C<sub>20</sub>H<sub>24</sub>NO<sub>4</sub>S (M+H<sup>+</sup>) 374.1421, found 374.1420.

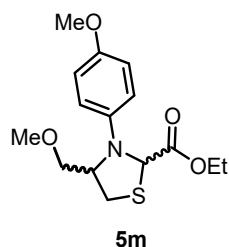

***Ethyl 4-(methoxymethyl)-3-(4-methoxyphenyl)thiazolidine-2-carboxylate (5m).***

Purified by flash column chromatography (silica gel, PE/EA = 64/1 to 16/1 as eluent). Colourless oil, 68% yield, 1:1 dr. <sup>1</sup>H NMR (400 MHz, CDCl<sub>3</sub>) δ 6.87-6.79 (m, 2H), 6.76-6.66 (m, 2H), 5.18 (d, *J* = 40.3 Hz, 1H), 4.27-4.11 (m, 2H), 3.96-3.86 (m, 1H), 3.85-3.78 (m, 1H), 3.76 (t, *J* = 2.0 Hz, 3H), 3.73-3.64 (m, 1H), 3.61-3.40 (m, 2H), 3.37 (d, *J* = 7.1 Hz, 3H), 1.27-1.21 (m, 3H); <sup>13</sup>C NMR (101 MHz, CDCl<sub>3</sub>) δ 172.0, 171.7, 153.8, 153.0, 141.2, 140.7, 117.0, 115.3, 115.0, 114.9, 74.6, 65.2, 63.3, 61.7, 61.6, 59.2, 59.1, 56.7, 55.8, 55.7, 53.9, 46.5, 45.7, 14.2. HRMS (ESI) calcd for C<sub>15</sub>H<sub>22</sub>NO<sub>4</sub>S (M+H<sup>+</sup>) 312.1264, found 312.1260.

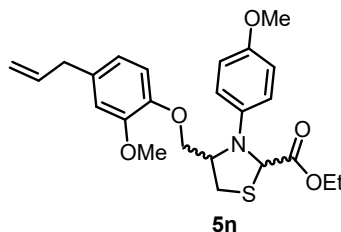

***Ethyl 4-((4-allyl-2-methoxyphenoxy)methyl)-3-(4-methoxyphenyl)thiazolidine-2-carboxylate (5n).***

Purified by flash column chromatography (silica gel, PE/EA = 64/1 to 16/1 as eluent). White solid, 75% yield, 1:1 dr. <sup>1</sup>H NMR (400 MHz, CDCl<sub>3</sub>) δ 6.89-6.78 (m, 3H), 6.76-6.67 (m, 4H), 6.02-5.88 (m, 1H), 5.31-5.13 (m, 1H), 5.12-5.04 (m, 2H), 4.27-3.90 (m, 7H), 3.85 (d, *J* = 3.7 Hz, 3H), 3.75 (d, *J* = 5.1 Hz, 3H), 3.33 (dd, *J* = 6.7, 1.7 Hz, 2H), 1.24 (dt, *J* = 17.4, 7.1 Hz, 3H); <sup>13</sup>C NMR (101 MHz, CDCl<sub>3</sub>) δ 171.9, 171.5, 153.8, 153.1, 149.9, 149.8, 146.4, 146.2, 141.2, 140.6, 137.7, 137.6, 134.3, 134.1, 120.73, 120.68, 116.8, 115.84, 115.80, 115.78, 115.4, 115.1, 114.92, 114.88, 112.7, 72.1, 71.8, 65.3, 63.1, 61.7, 61.5, 56.9, 56.0, 55.9, 55.7, 53.7, 45.9, 45.4, 39.9, 14.18, 14.16. HRMS (ESI) calcd for C<sub>24</sub>H<sub>30</sub>NO<sub>5</sub>S (M+H<sup>+</sup>) 444.1839, found 444.1835.

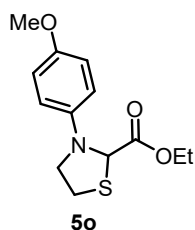

**Ethyl 3-(4-methoxyphenyl)thiazolidine-2-carboxylate (5o).** Purified by flash column chromatography (silica gel, PE/EA = 64/1 to 16/1 as eluent). Colourless oil, 78% yield.  $^1\text{H}$  NMR (400 MHz,  $\text{CDCl}_3$ )  $\delta$  6.86-6.79 (m, 2H), 6.74-6.67 (m, 2H), 5.13 (s, 1H), 4.26-4.14 (m, 2H), 3.85-3.75 (m, 2H), 3.75 (s, 3H), 3.61-3.30 (m, 1H), 3.10-3.04 (m, 1H), 1.27 (t,  $J = 7.1$  Hz, 3H);  $^{13}\text{C}$  NMR (101 MHz,  $\text{CDCl}_3$ )  $\delta$  171.8, 153.4, 141.0, 116.1, 114.9, 64.9, 61.6, 55.8, 53.7, 30.6, 14.2. HRMS (ESI) calcd for  $\text{C}_{13}\text{H}_{18}\text{NO}_3\text{S}$  ( $\text{M}+\text{H}^+$ ) 268.1002, found 268.1000.

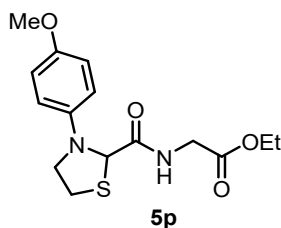

**Ethyl (3-(4-methoxyphenyl)thiazolidine-2-carbonyl)glycinate (5p).** Purified by flash column chromatography (silica gel, PE/EA = 32/1 to 8/1 as eluent). Yellow oil, 61% yield,  $^1\text{H}$  NMR (400 MHz,  $\text{CDCl}_3$ )  $\delta$  7.35-7.27 (m, 1H), 6.96-6.72 (m, 4H), 4.98 (s, 1H), 4.21-4.12 (m, 3H), 3.97 (dd,  $J = 18.3, 5.0$  Hz, 1H), 3.84-3.78 (m, 1H), 3.77 (d,  $J = 8.6$  Hz, 3H), 3.68-3.62 (m, 1H), 3.36-3.19 (m, 1H), 2.99-3.04 (m, 1H), 1.26 (t,  $J = 7.3$  Hz, 3H);  $^{13}\text{C}$  NMR (101 MHz,  $\text{CDCl}_3$ )  $\delta$  172.0, 169.7, 154.5, 141.5, 117.4, 114.9, 69.2, 61.7, 55.73, 55.68, 41.4, 30.7, 14.2. HRMS (ESI) calcd for  $\text{C}_{15}\text{H}_{21}\text{N}_2\text{O}_4\text{S}$  ( $\text{M}+\text{H}^+$ ) 325.1217, found 325.1218.

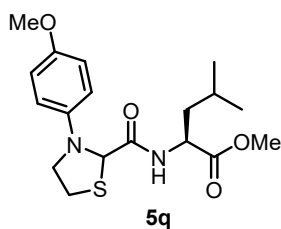

**Methyl (3-(4-methoxyphenyl)thiazolidine-2-carbonyl)-L-leucinate (5q).** Purified by flash column chromatography (silica gel, PE/EA = 32/1 to 8/1 as eluent). Yellow oil,

57% yield, 1:1 dr.  $^1\text{H}$  NMR (400 MHz,  $\text{CDCl}_3$ )  $\delta$  7.13 (dd,  $J = 9.1, 4.3$  Hz, 1H), 6.82 (d,  $J = 15.8$  Hz, 4H), 4.95 (d,  $J = 15.3$  Hz, 1H), 4.61-4.72 (m, 1H), 3.77 (t,  $J = 1.4$  Hz, 3H), 3.73 (s, 1H), 3.68 (s, 3H), 3.15-3.31 (m, 1H), 2.98-3.06 (m, 1H), 1.78-1.43 (m, 4H), 0.95 (dd,  $J = 6.3, 2.4$  Hz, 3H), 0.91 (d,  $J = 6.1$  Hz, 2H), 0.85 (d,  $J = 6.1$  Hz, 1H);  $^{13}\text{C}$  NMR (101 MHz,  $\text{CDCl}_3$ )  $\delta$  173.5, 173.1, 171.8, 171.3, 154.6, 154.4, 141.6, 141.4, 117.6, 117.2, 114.9, 114.8, 69.4, 69.1, 55.8, 55.74, 55.69, 55.6, 52.5, 52.4, 50.8, 50.6, 41.7, 41.3, 30.8, 30.6, 25.2, 25.0, 23.03, 22.99, 22.0, 21.8. HRMS (ESI) calcd for  $\text{C}_{18}\text{H}_{27}\text{N}_2\text{O}_4\text{S}$  ( $\text{M}+\text{H}^+$ ) 367.1686, found 367.1690.

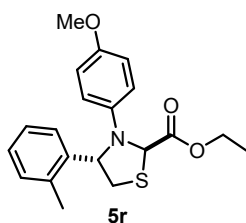

***Ethyl (2R,4S)-3-(4-methoxyphenyl)-4-(o-tolyl)thiazolidine-2-carboxylate (5r).***

Purified by flash column chromatography (silica gel, PE/EA = 64/1 to 16/1 as eluent). Light yellow solid, 75% yield, >20:1 dr.  $^1\text{H}$  NMR (400 MHz,  $\text{CDCl}_3$ )  $\delta$  7.27-7.03 (m, 4H), 6.69 (d,  $J = 9.0$  Hz, 2H), 6.34 (d,  $J = 9.1$  Hz, 2H), 5.39 (d,  $J = 5.7$  Hz, 2H), 4.23 (dd,  $J = 7.9, 7.1$  Hz, 2H), 3.97 (dd,  $J = 11.0, 7.3$  Hz, 1H), 3.67 (s, 3H), 2.81 (dd,  $J = 11.0, 1.5$  Hz, 1H), 2.48 (s, 3H), 1.28 (t,  $J = 7.1$  Hz, 3H);  $^{13}\text{C}$  NMR (400 MHz,  $\text{CDCl}_3$ )  $\delta$  171.8, 152.1, 139.6, 138.6, 133.9, 130.7, 127.3, 126.5, 126.1, 114.9, 114.6, 64.1, 63.0, 61.6, 55.6, 37.5, 19.4, 14.2. HRMS (ESI) calcd for  $\text{C}_{20}\text{H}_{23}\text{NO}_3\text{S}$  ( $\text{M}+\text{Na}^+$ ) 380.1291, found 380.1291.

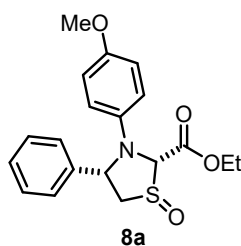

***Ethyl 3-(4-methoxyphenyl)-4-phenylthiazolidine-2-carboxylate 1-oxide (8a).***

Purified by flash column chromatography (silica gel, PE/EA = 8/1 to 4/1 as eluent). White solid, 75 % yield, > 20:1 dr.  $^1\text{H}$  NMR (400 MHz,  $\text{CDCl}_3$ )  $\delta$  7.61 (dd,  $J = 7.3, 1.7$  Hz, 2H), 7.35 (t,  $J = 7.5$  Hz, 2H), 7.28 (d,  $J = 7.2$  Hz, 1H), 6.76-6.68 (m, 2H), 6.67-6.62 (m, 2H), 5.75 (dd,  $J = 11.6, 4.9$  Hz, 1H), 5.29 (s, 1H), 4.36 (q,  $J = 7.2$  Hz, 2H), 3.68 (s, 3H), 3.61-3.56 (m, 1H), 3.15-3.08 (m, 1H), 1.39 (t,  $J = 7.1$  Hz, 3H);  $^{13}\text{C}$  NMR (101 MHz,  $\text{CDCl}_3$ )

$\delta$  168.0, 154.0, 140.3, 139.6, 129.3, 128.2, 126.8, 117.5, 114.7, 89.4, 65.8, 62.8, 58.6, 55.6, 14.3. HRMS (ESI) calcd for  $C_{19}H_{22}NO_4S$  ( $M+H^+$ ) 360.1264, found 360.1264.

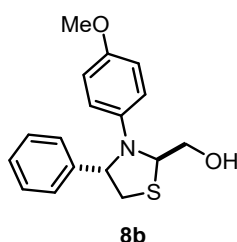

**3-(4-Methoxyphenyl)-4-phenylthiazolidin-2-ylmethanol (8b).** Purified by flash column chromatography (silica gel, PE/EA = 6/1 to 2/1 as eluent). White solid, 92 % yield, 4:1 dr.  $^1H$  NMR (400 MHz,  $CDCl_3$ )  $\delta$  7.23-7.14 (m, 5H), 6.69-6.64 (m, 2H), 6.62-6.57 (m, 2H), 5.22 (dd,  $J = 7.3, 3.9$  Hz, 1H), 5.08 (dd,  $J = 6.4, 3.3$  Hz, 1H), 3.88 (dd,  $J = 11.6, 3.9$  Hz, 1H), 3.63 (s, 3H), 3.62-3.52 (m, 2H), 2.87 (dd,  $J = 11.2, 3.3$  Hz, 1H), 2.52 (s, 1H);  $^{13}C$  NMR (101 MHz,  $CDCl_3$ )  $\delta$  152.6, 141.0, 138.3, 128.3, 127.4, 127.2, 117.9, 114.6, 69.1, 65.8, 63.2, 55.5, 37.6. HRMS (ESI) calcd for  $C_{17}H_{20}NO_2S$  ( $M+H^+$ ) 302.1209, found 302.1211.

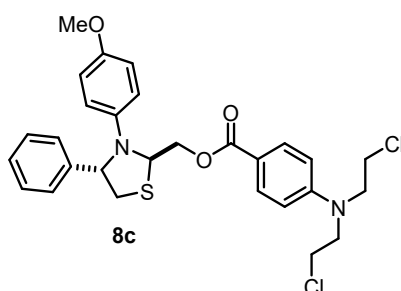

**3-(4-Methoxyphenyl)-4-phenylthiazolidin-2-ylmethyl 4-(bis(2-chloroethyl)amino)benzoate (8c).** Purified by flash column chromatography (silica gel, PE/EA = 8/1 to 4/1 as eluent). White solid, 82 % yield, 4:1 dr.  $^1H$  NMR (400 MHz,  $CDCl_3$ )  $\delta$  7.90 (d,  $J = 8.9$  Hz, 2H), 7.25-7.15 (m, 5H), 6.71 (d,  $J = 5.8$  Hz, 2H), 6.65 (d,  $J = 8.8$  Hz, 2H), 5.47 (dd,  $J = 7.9, 4.3$  Hz, 1H), 5.17 (dd,  $J = 6.5, 2.8$  Hz, 1H), 4.80-4.75 (m, 1H), 4.16 (dd,  $J = 11.3, 7.9$  Hz, 1H), 3.79 (t,  $J = 7.0$  Hz, 4H), 3.72 (dd,  $J = 11.4, 6.5$  Hz, 1H), 3.66-3.62 (m, 7H), 2.94 (dd,  $J = 11.3, 2.8$  Hz, 1H);  $^{13}C$  NMR (101 MHz,  $CDCl_3$ )  $\delta$  166.4, 152.6, 149.9, 141.3, 138.4, 132.1, 128.4, 127.2, 126.0, 118.6, 117.9, 114.7, 110.9, 65.5, 65.1, 64.8, 55.6, 53.4, 40.2, 38.1. HRMS (ESI) calcd for  $C_{28}H_{31}Cl_2N_2O_3S$  ( $M+H^+$ ) 545.1427, found 545.1431.

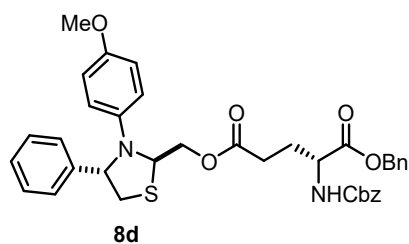

***1-Benzyl 5-((3-(4-methoxyphenyl)-4-phenylthiazolidin-2-yl)methyl) ((benzyloxy) carbonyl)-D-glutamate (8d)***. Purified by flash column chromatography (silica gel, PE/EA = 6/1 to 2/1 as eluent). White solid, 76 % yield, 4:1 dr. <sup>1</sup>H NMR (400 MHz, CDCl<sub>3</sub>) δ 7.41-7.30 (m, 12H), 7.25-7.18 (m, 3H), 6.76 (d, *J* = 2.1 Hz, 1H), 6.71-6.63 (m, 3H), 5.56 (dd, *J* = 22.1, 8.3 Hz, 1H), 5.35 (dd, *J* = 7.8, 4.6 Hz, 1H), 5.19 (s, 2H), 5.13 (d, *J* = 3.8 Hz, 2H), 4.60-4.54 (m, 1H), 4.52-4.46 (m, 1H), 4.02-3.96 (m, 1H), 3.67 (s, 3H), 2.88-2.93 (m, 1H), 2.52-2.20 (m, 3H), 2.05-1.91 (m, 1H); <sup>13</sup>C NMR (101 MHz, CDCl<sub>3</sub>) δ 172.5, 171.7, 156.0, 152.6, 141.1, 138.2, 136.2, 135.2, 128.7, 128.59, 128.57, 128.5, 128.3, 128.24, 128.17, 127.4, 127.1, 125.9, 117.8, 114.6, 67.4, 67.2, 65.5, 65.0, 64.6, 55.5, 53.4, 37.9, 30.1, 27.6. HRMS (ESI) calcd for C<sub>37</sub>H<sub>39</sub>N<sub>2</sub>O<sub>7</sub>S (M+H<sup>+</sup>) 655.2472, found 655.2468.



## 7. References

1. a) J. Xie and Z.-Z. Huang, *Angew. Chem., Int. Ed.*, **2010**, 49, 10181-10185. b) R. Martín-Rapún, S. Sayalero and M. A. Pericàs, *Green Chem.*, **2013**, 15, 3295-3301.
2. J. S. Yadav, B. V. S. Reddy, G. Baishya, *Synlett.*, **2003**, 396-398.
3. M. J. Frisch, G. W. Trucks, H. B. Schlegel, G. E. Scuseria, M. A. Robb, J. R. Cheeseman, G. Scalmani, V. Barone, B. Mennucci, G. A. Petersson, H. Nakatsuji, M. Caricato, X. Li, H. P. Hratchian, A. F. Izmaylov, J. Bloino, G. Zheng, J. L. Sonnenberg, M. Hada, M. Ehara, K. Toyota, R. Fukuda, J. Hasegawa, M. Ishida, T. Nakajima, Y. Honda, O. Kitao, H. Nakai, T. Vreven, J. A. Montgomery, Jr., J. E. Peralta, F. Ogliaro, M. Bearpark, J. J. Heyd, E. Brothers, K. N. Kudin, V. N. Staroverov, T. Keith, R. Kobayashi, J. Normand, K. Raghavachari, A. Rendell, J. C. Burant, S. S. Iyengar, J. Tomasi, M. Cossi, N. Rega, J. M. Millam, M. Klene, J. E. Knox, J. B. Cross, V. Bakken, C. Adamo, J. Jaramillo, R. Gomperts, R. E. Stratmann, O. Yazyev, A. J. Austin, R. Cammi, C. Pomelli, J. W. Ochterski, R. L. Martin, K. Morokuma, V. G. Zakrzewski, G. A. Voth, P. Salvador, J. J. Dannenberg, S. Dapprich, A. D. Daniels, O. Farkas, J. B. Foresman, J. V. Ortiz, J. Cioslowski, and D. J. Fox, Gaussian 09, D.01, Gaussian, Inc., Wallingford CT, **2013**.
4. Parr, R. G.; Yang, W. *Density-functional Theory of Atoms and Molecules*; Oxford University Press: New York, **1989**.
5. a) A. D. Becke, *J. Chem. Phys.* **1993**, 98, 5648–5652; b) C. Lee, W. Yang, R. G. Parr *Phys. Rev. B*, **1988**, 37, 785–789.
6. C. Y. Legault, CYLView, 1.0b, Université de Sherbrooke, **2009**; <http://www.cylview.org>.
7. a) Y. Zhao, D. G. Truhlar, *J. Phys. Chem. Lett.*, **2008**, 112, 1095-1099; b) D. Jacquemin, E. A. Perpète, I. Ciofini, C. Adamo, R. Valero, Y. Zhao, D. Truhlar, *J. Chem. Theory Comput.* **2010**, 6, 2071- 2085.

## 8. Copies of $^1\text{H}$ and $^{13}\text{C}$ NMR Spectra

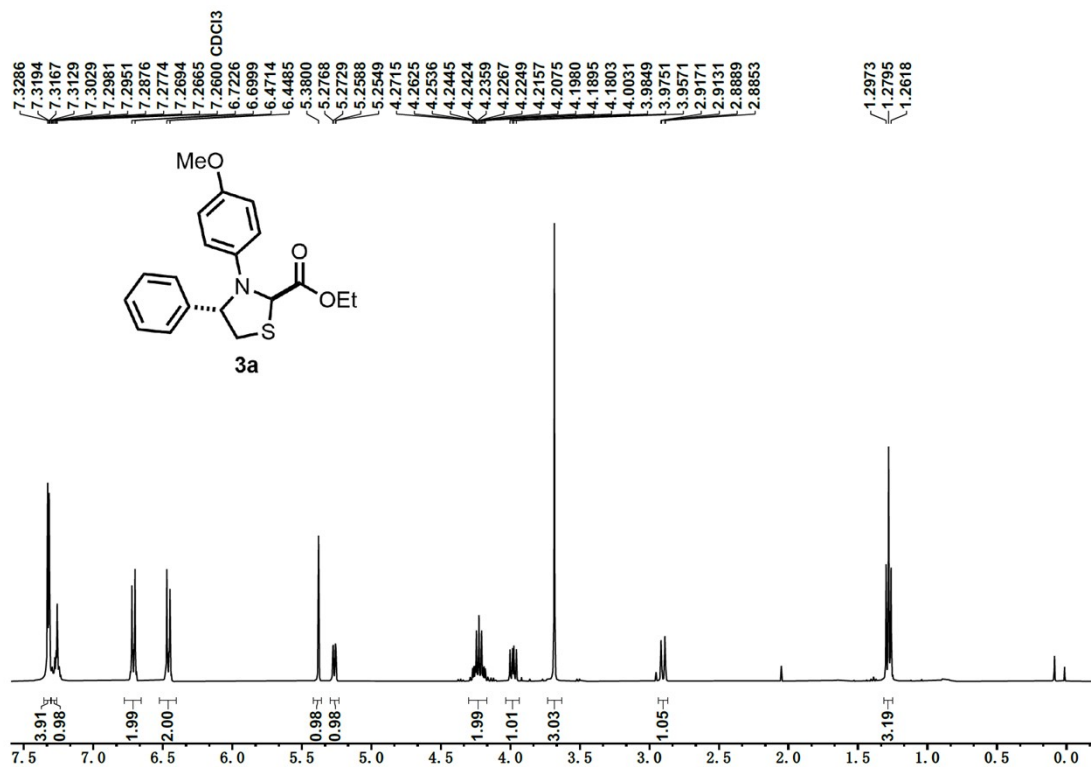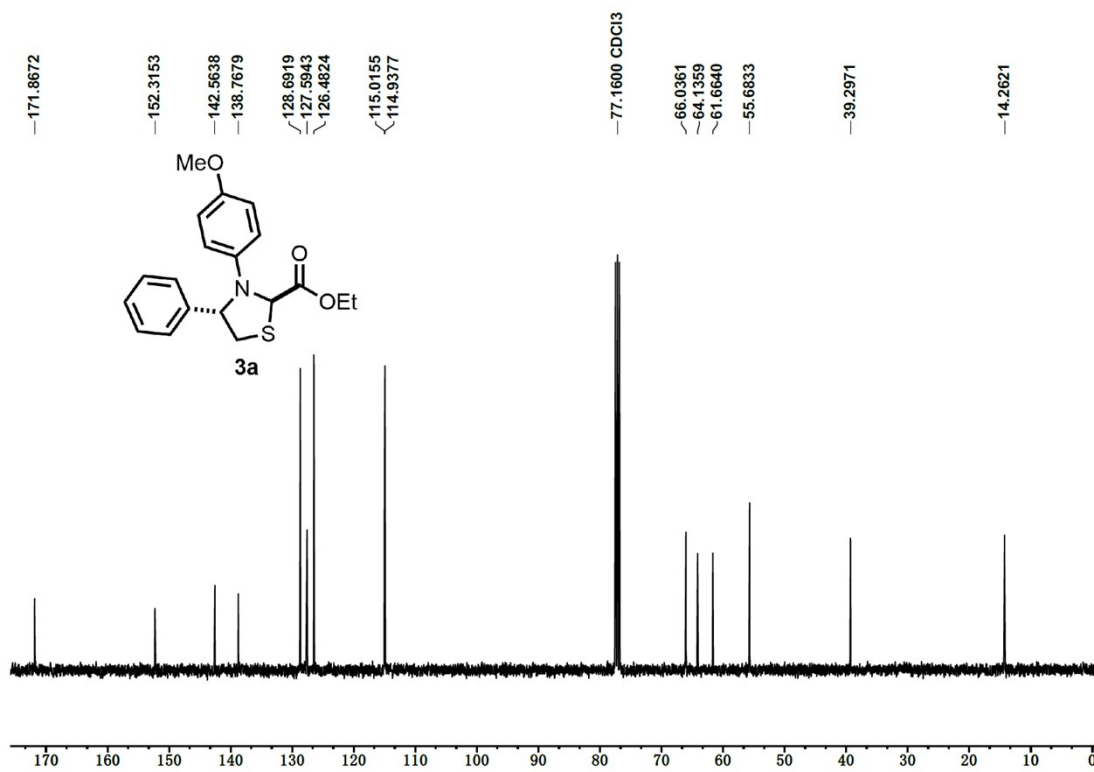

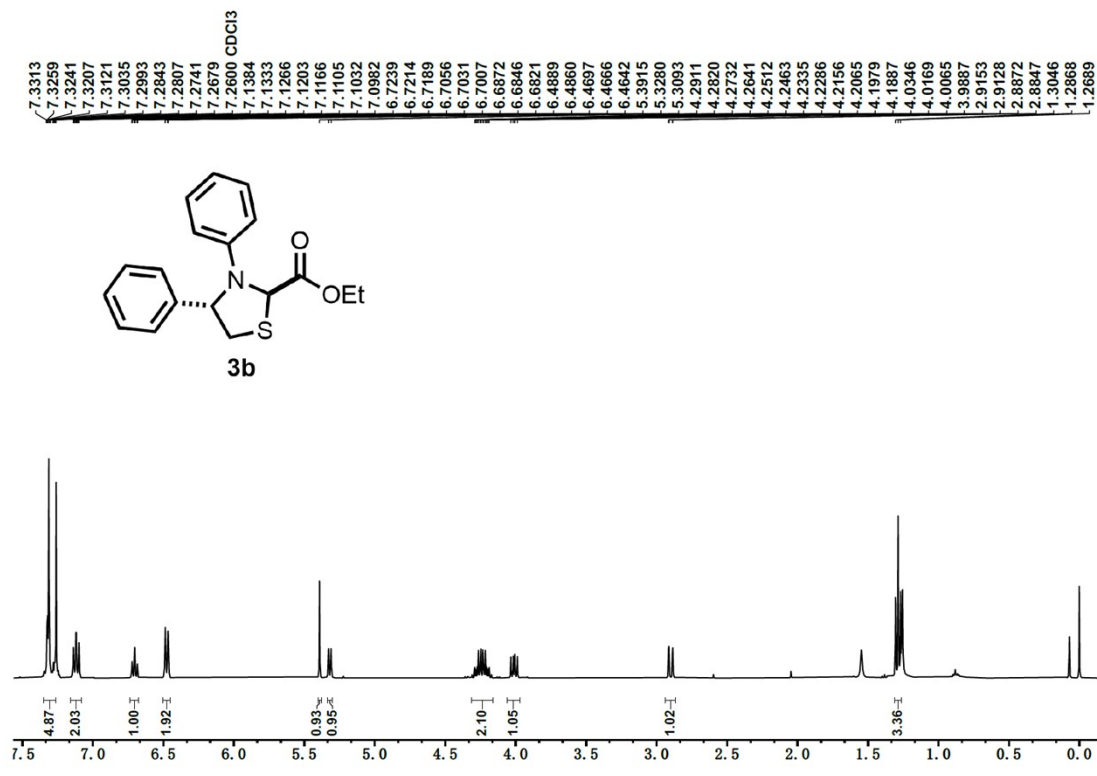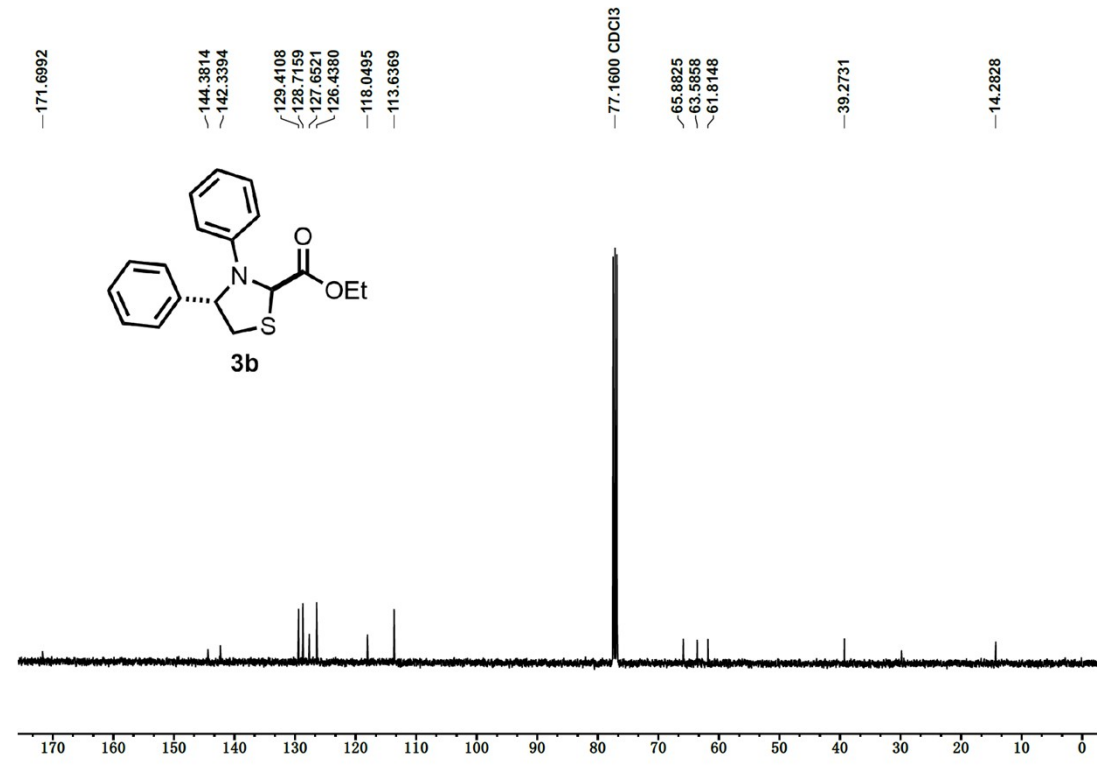

7.2736  
7.2711  
7.2667  
7.2507  
7.2398  
7.2285  
7.2218  
7.2184  
7.2145  
7.2042  
7.1961  
7.1928  
7.1839  
7.1760  
7.1706  
7.1613  
7.1613  
6.8688  
6.8631  
6.8530  
6.8476  
6.3466  
6.3390  
6.3337  
6.3226  
6.3175  
6.3098  
6.3098  
5.3145  
5.2329  
5.2301  
5.2148  
5.2121  
5.2121  
4.2365  
4.2187  
4.2096  
4.2009  
4.1918  
4.1830  
4.1830  
4.1740  
4.1704  
4.1563  
4.1528  
4.1436  
4.1350  
4.1259  
4.1172  
4.1081  
4.0904  
3.9539  
3.9360  
3.9259  
3.9079  
2.8372  
2.8342  
2.8091  
2.8062  
2.1109  
1.2367  
1.2189  
1.2008

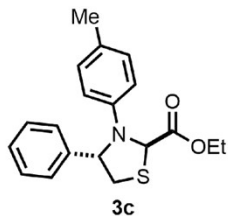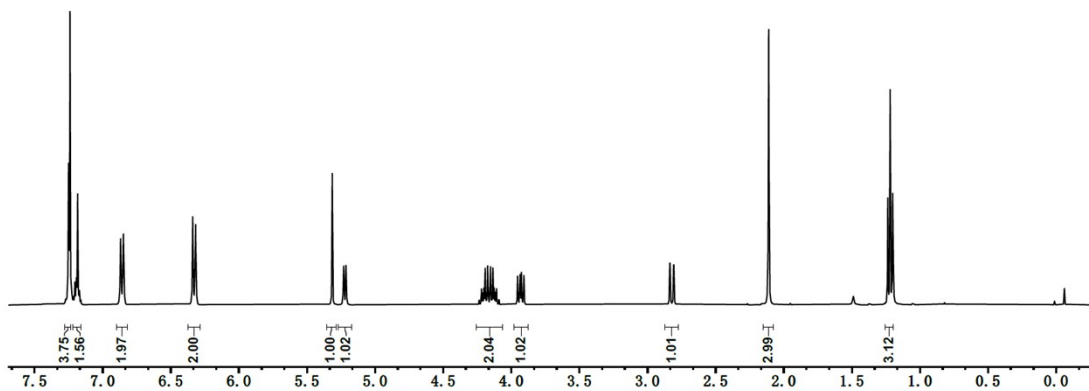

171.7996  
142.5402  
142.1731  
129.9418  
128.6805  
127.5656  
127.1390  
126.4245  
113.6451  
77.1600 CDCl3  
65.8405  
63.6914  
61.7170  
39.2587  
20.3444  
14.2779

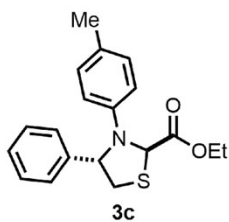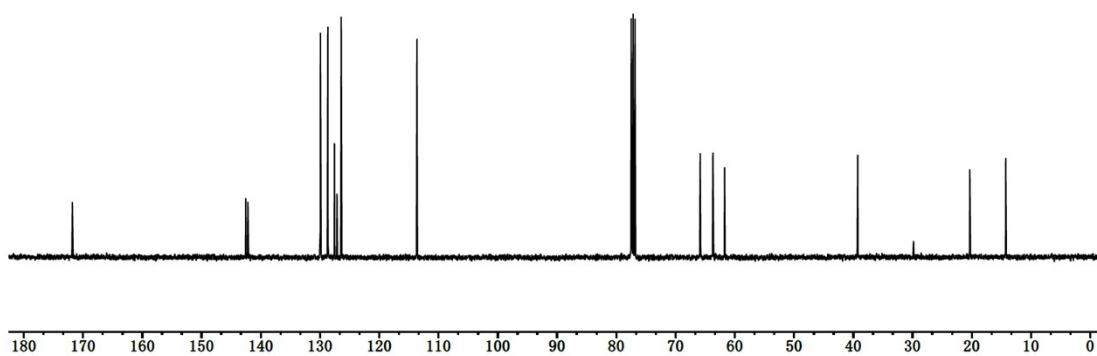

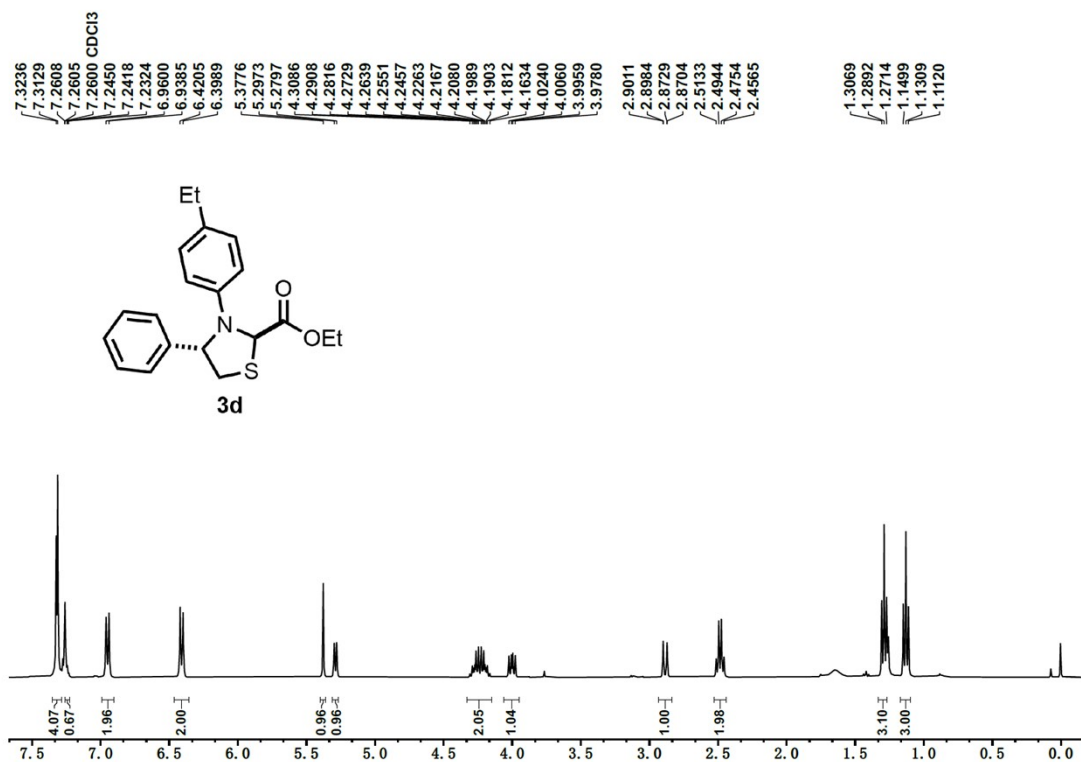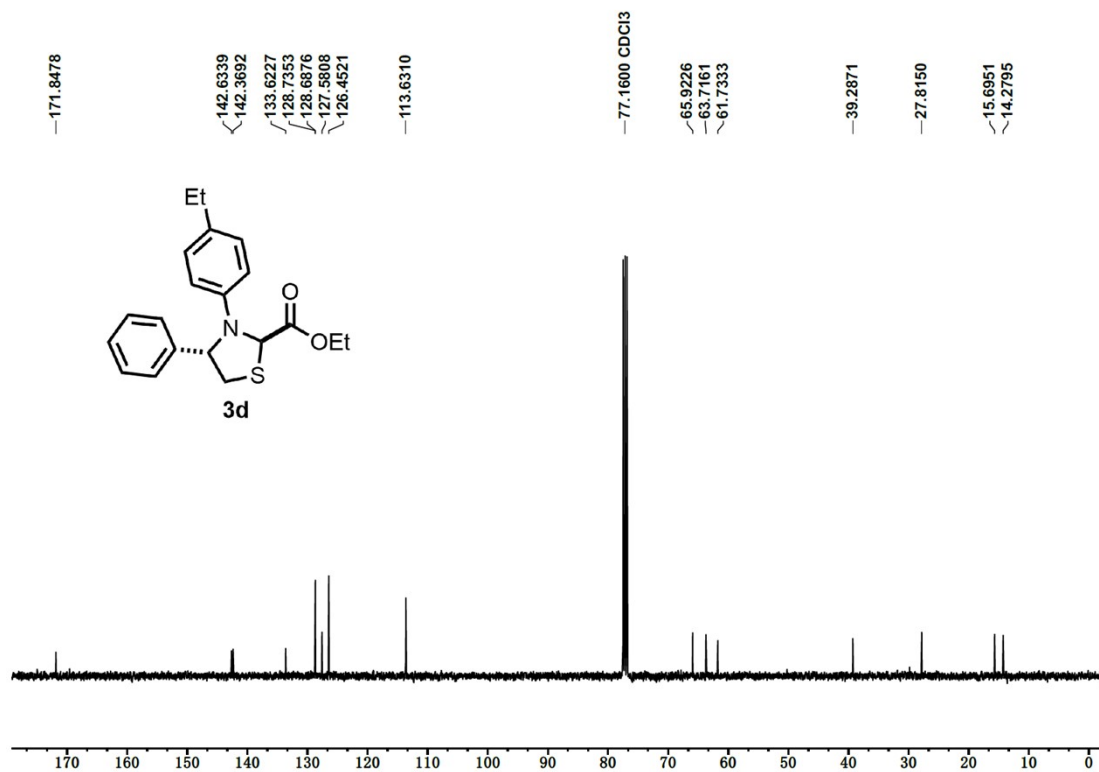

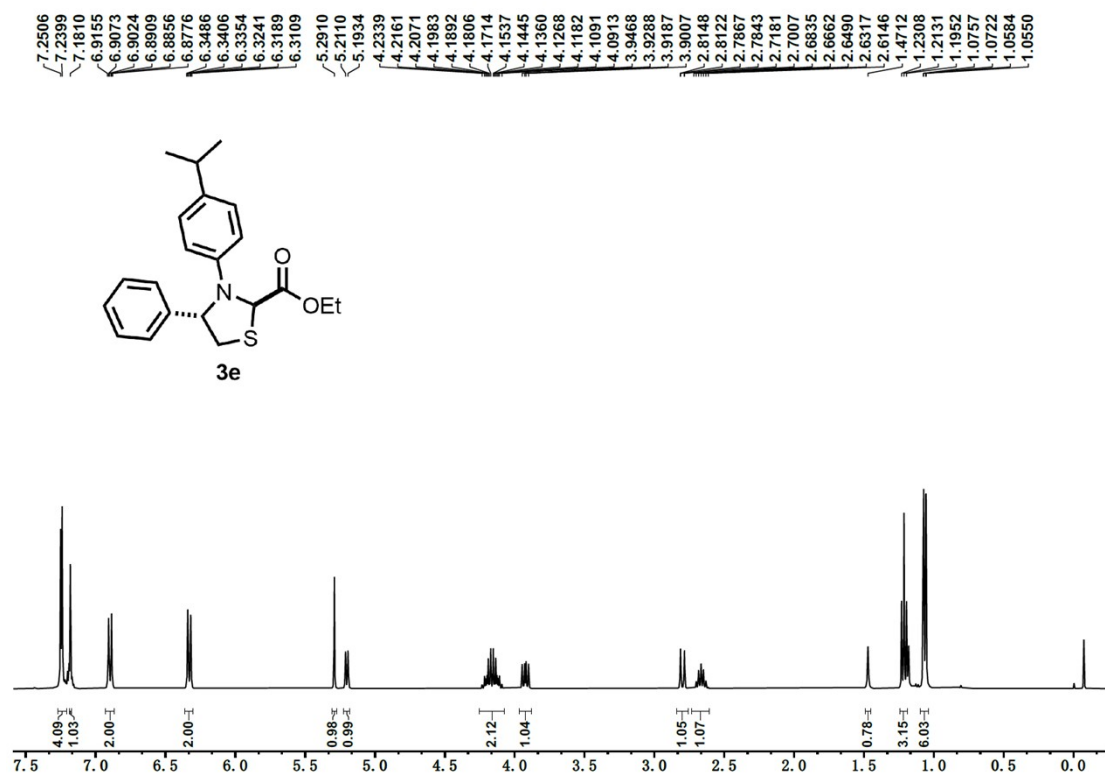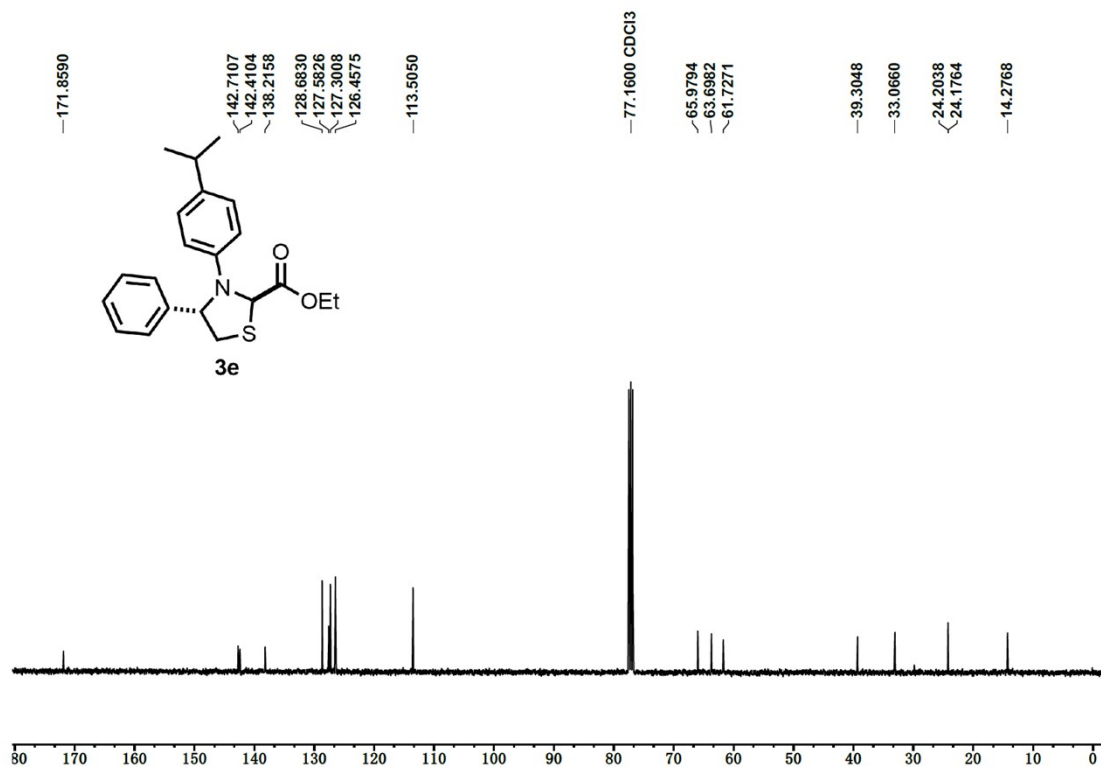

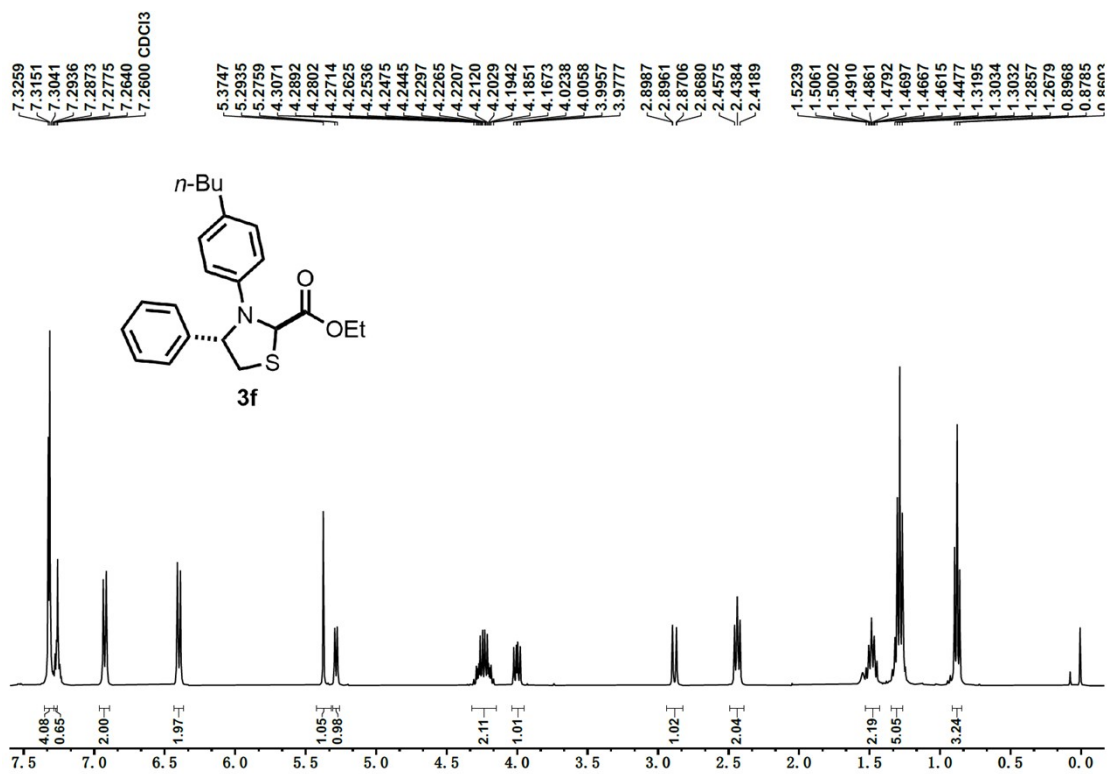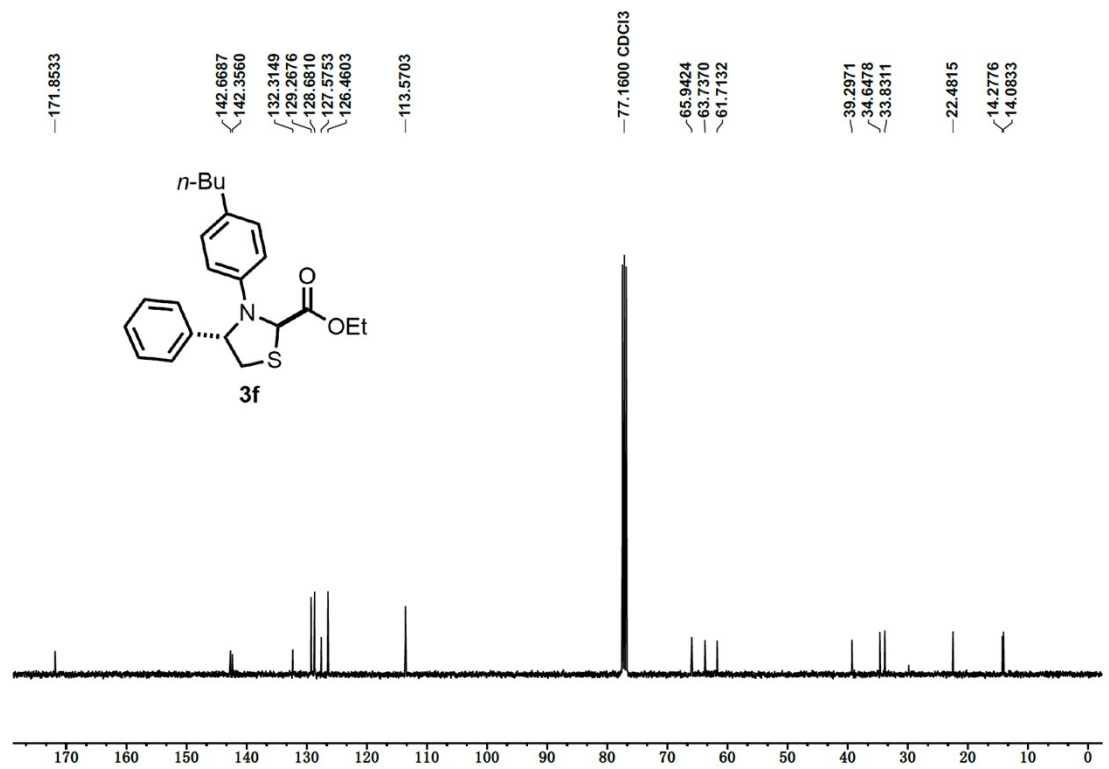

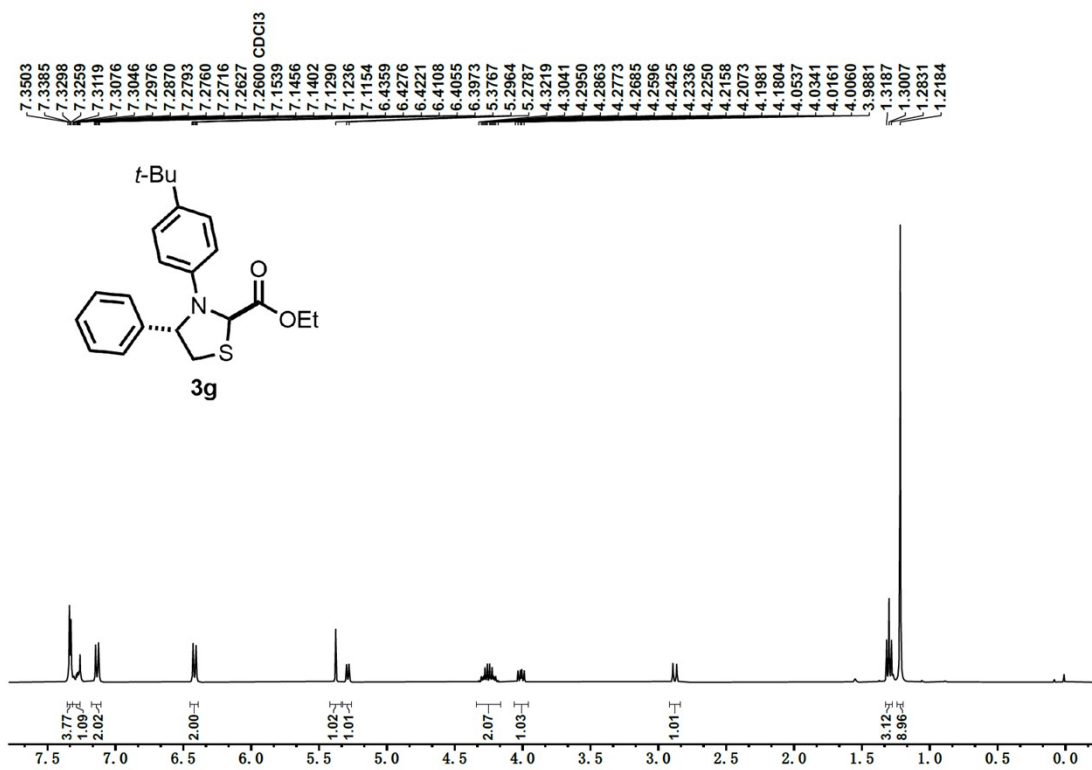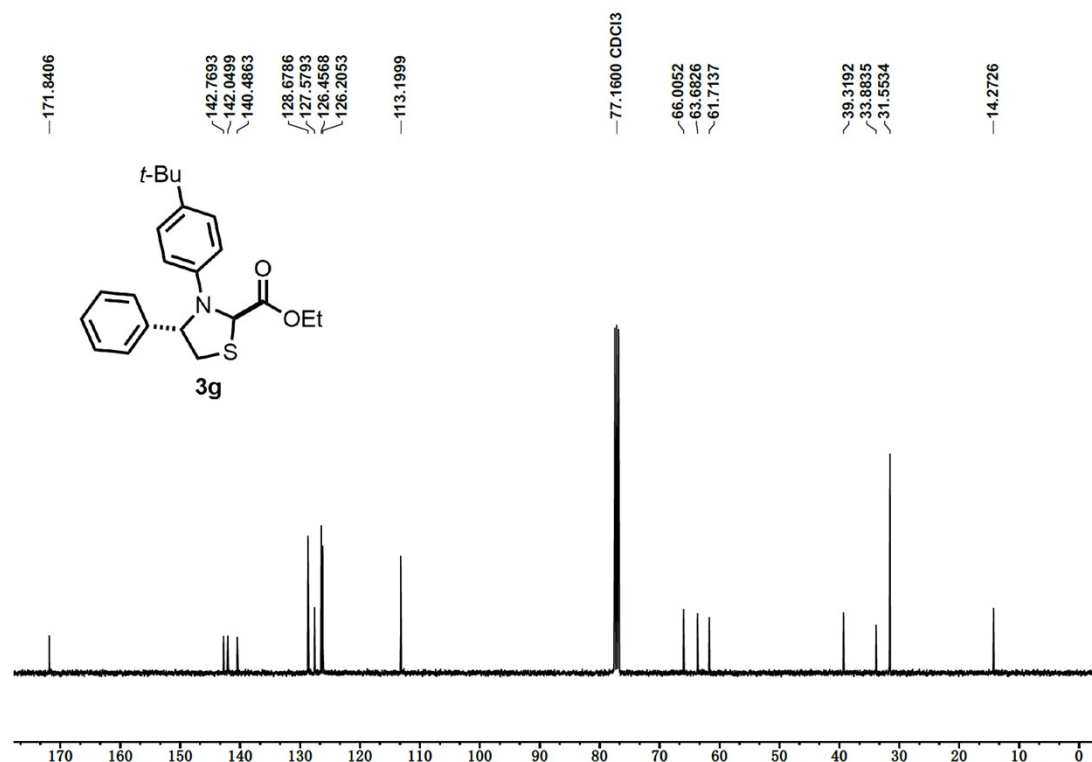



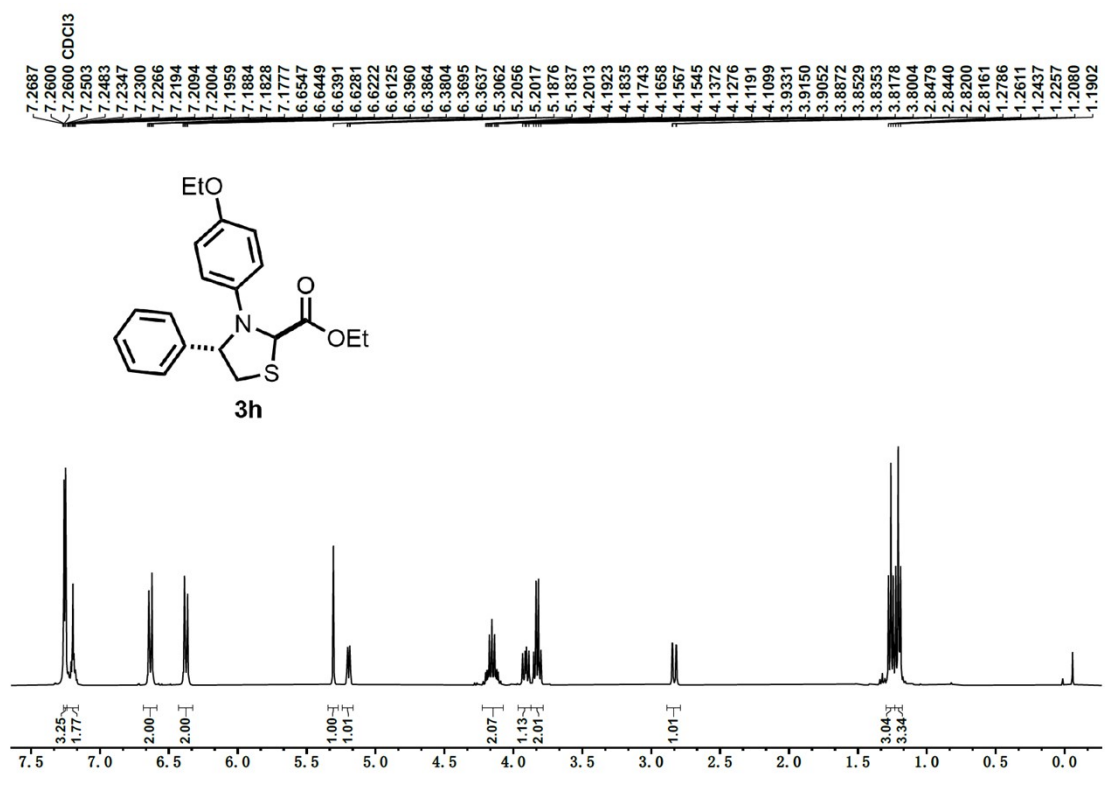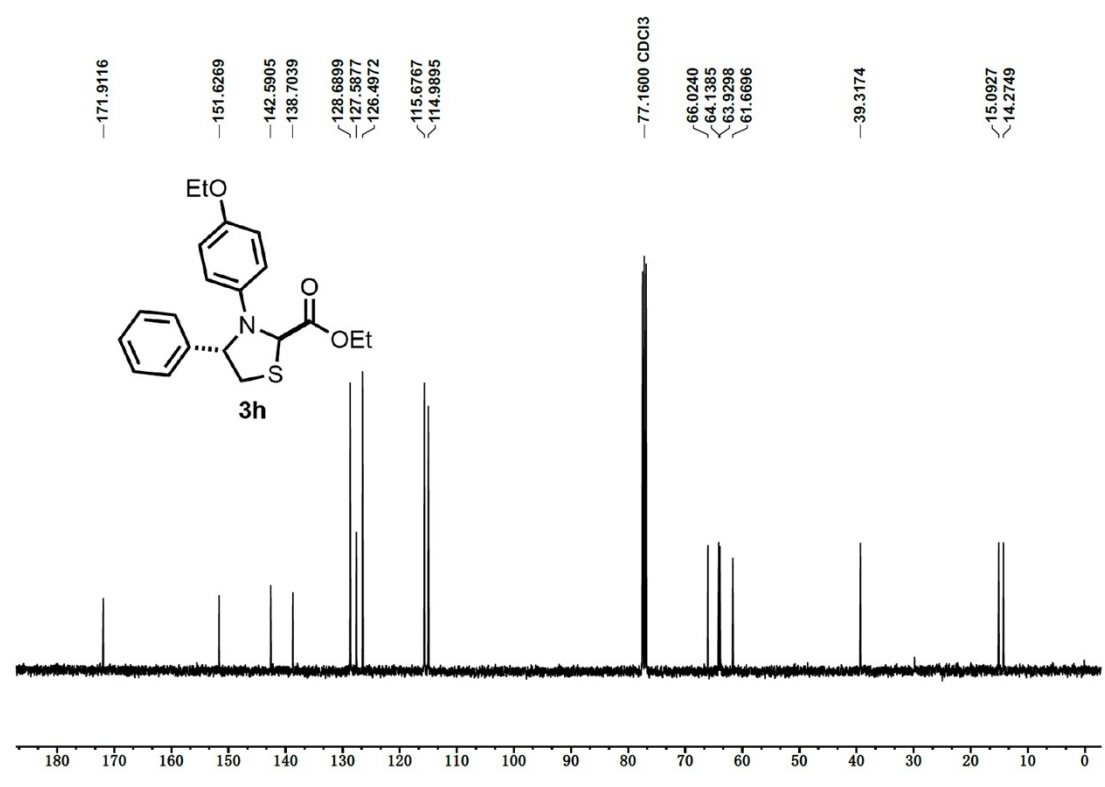

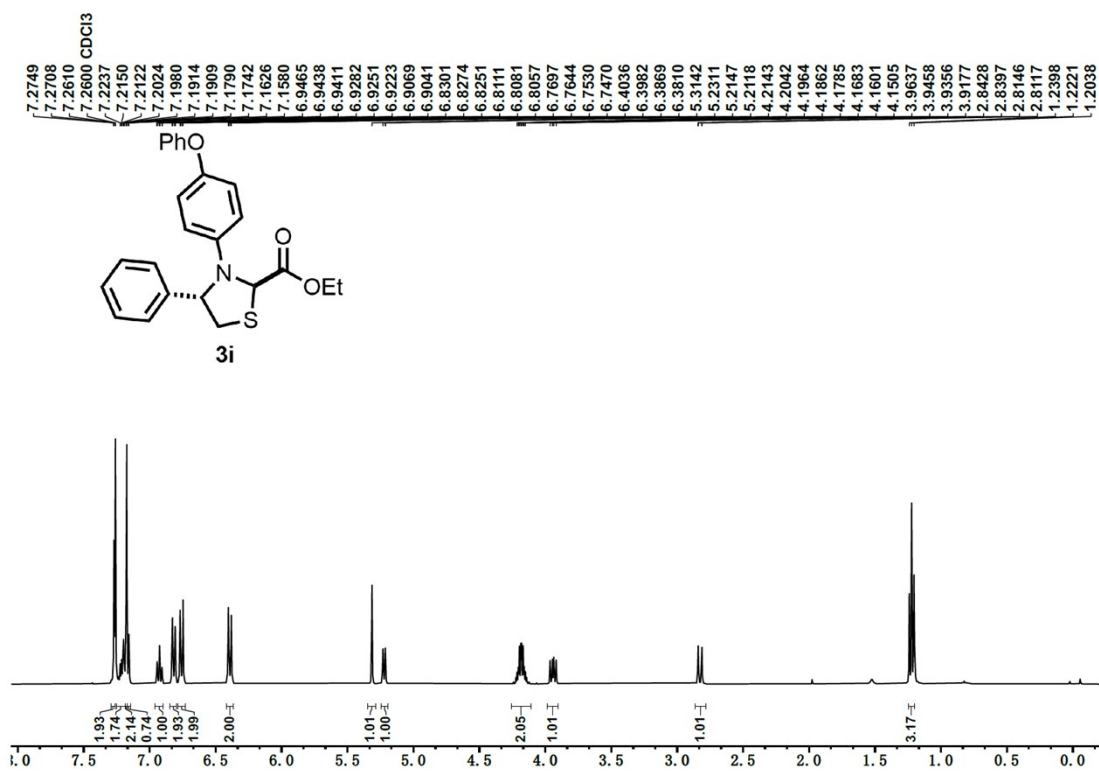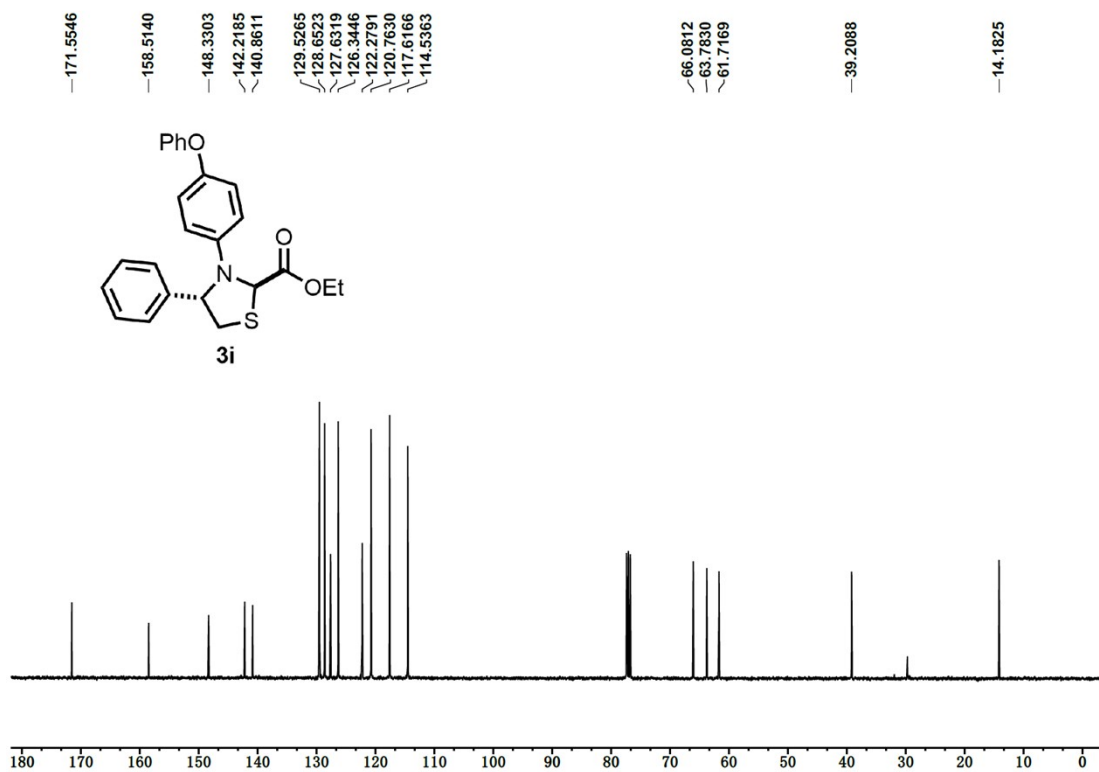

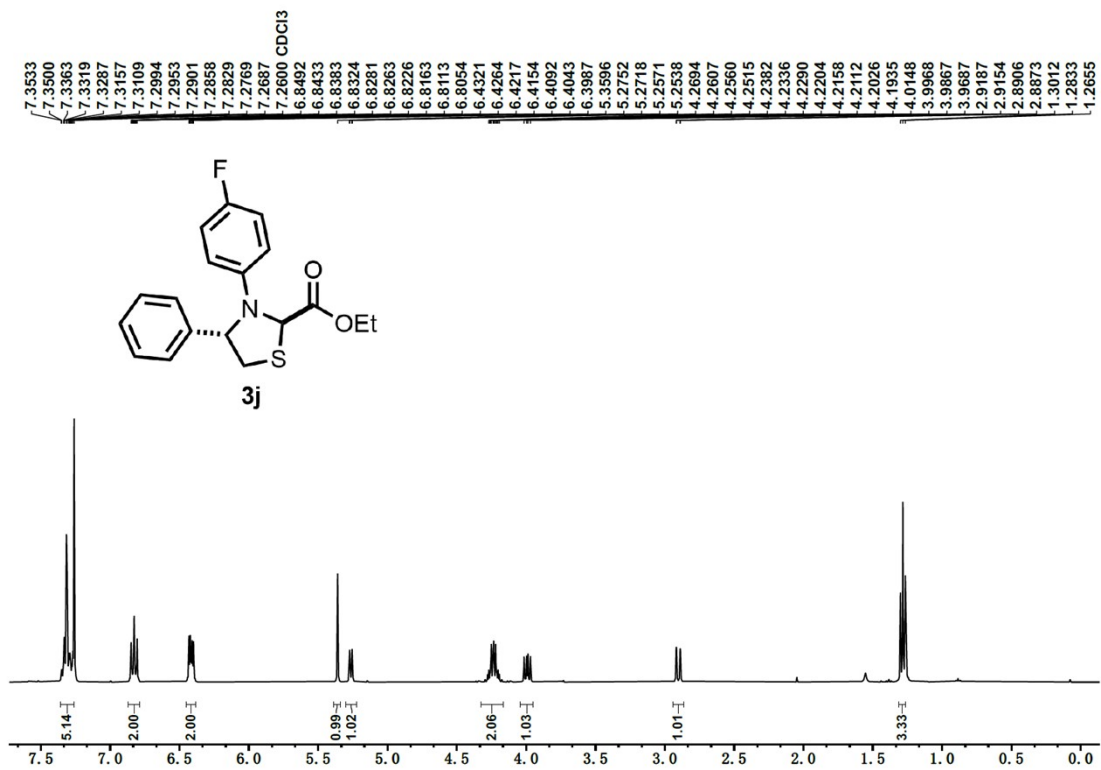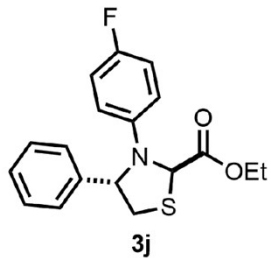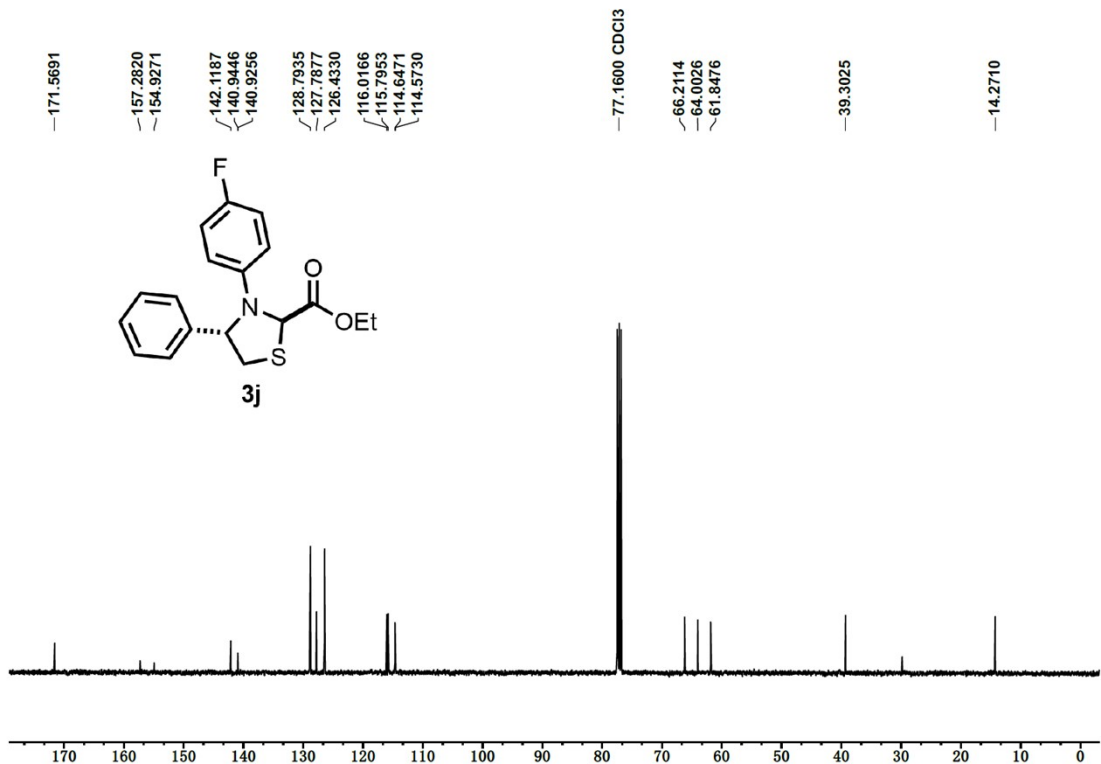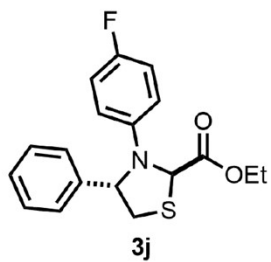

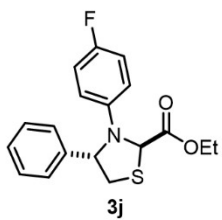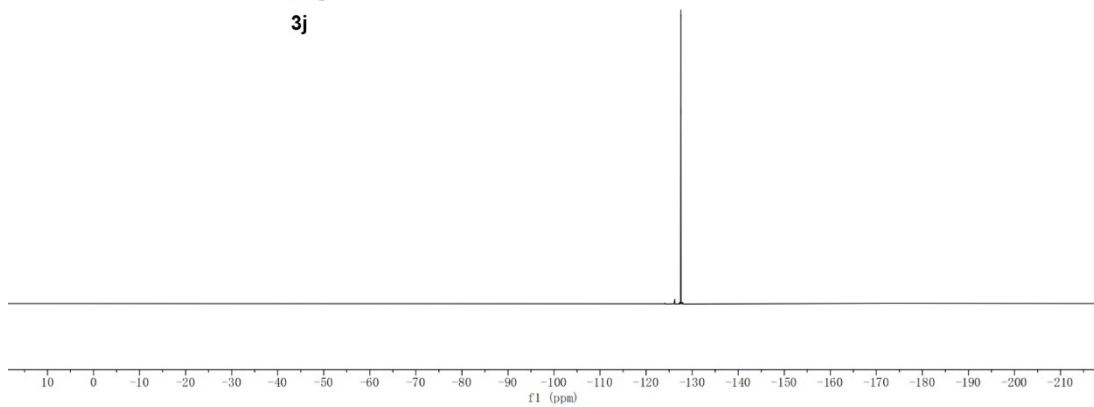

7.2992  
7.2957  
7.2914  
7.2884  
7.2805  
7.2778  
7.2747  
7.2674  
7.2600 CDCl3  
7.2387  
7.2258  
7.2215  
7.2190  
7.2038  
7.1667  
7.1580  
7.1526  
7.1408  
7.1355  
7.1268  
6.3218  
6.3131  
6.3077  
6.2959  
6.2905  
6.2818  
5.2936  
5.2284  
5.2107  
4.5668  
4.2390  
4.2299  
4.2211  
4.2121  
4.2058  
4.2030  
4.1941  
4.1881  
4.1791  
4.1764  
4.1703  
4.1612  
4.1527  
4.1435  
4.1257  
3.9697  
3.9518  
3.9414  
3.9235  
2.8643  
2.8618  
2.8361  
2.8335  
1.2590  
1.2412  
1.2234

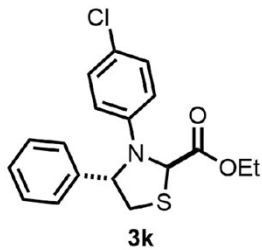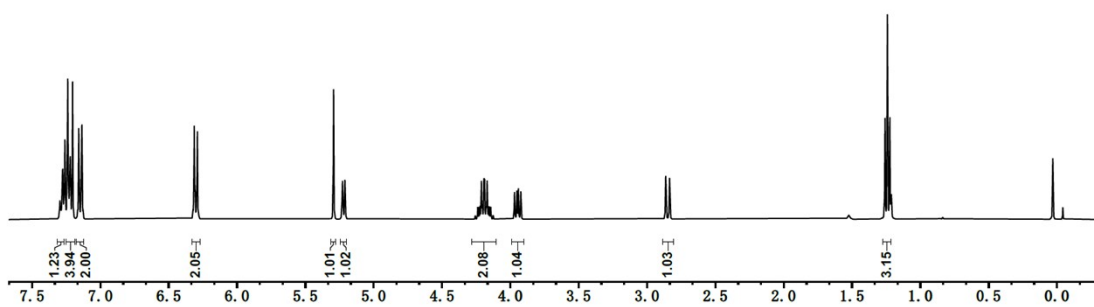

-171.2703

-143.3978  
-141.6739

-132.1303  
-128.7945  
-127.8425  
-126.3426

-115.2360  
-110.3282

-77.1600 CDCl3

-66.0079  
-63.5493  
-61.9587

-39.2106

-14.2681

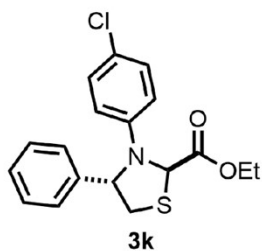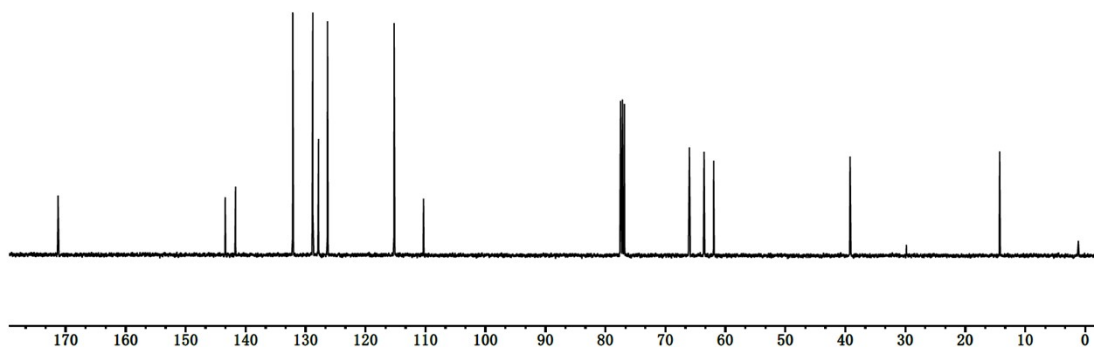

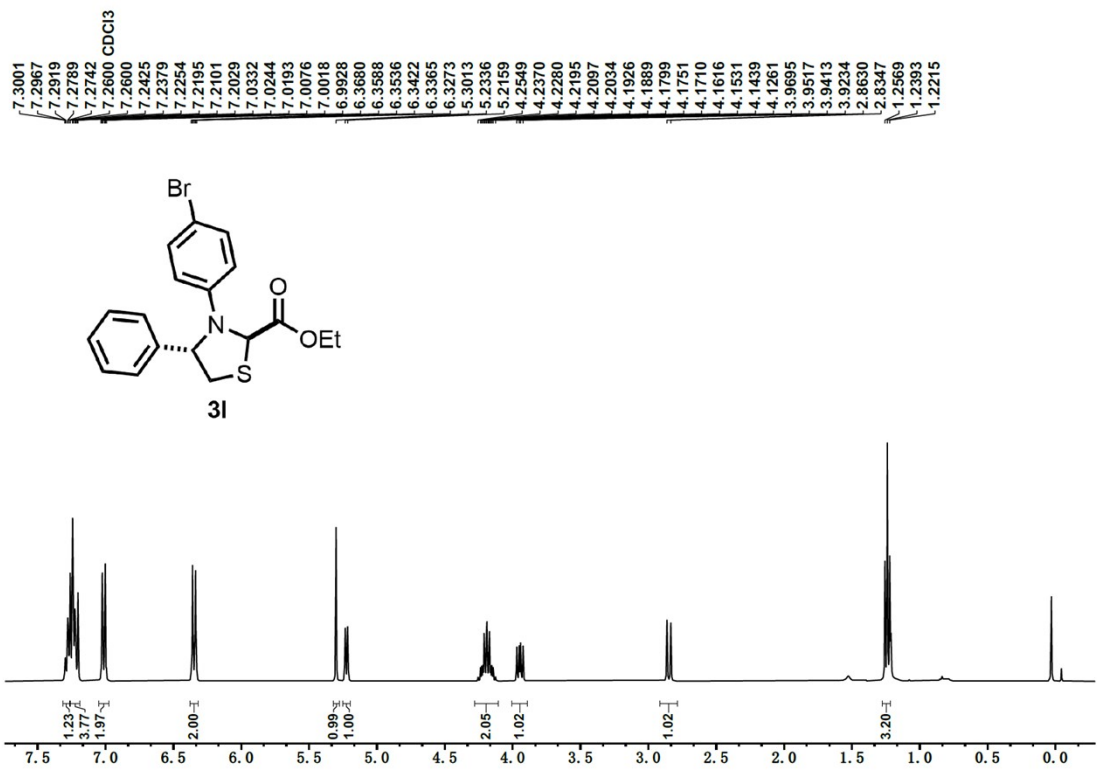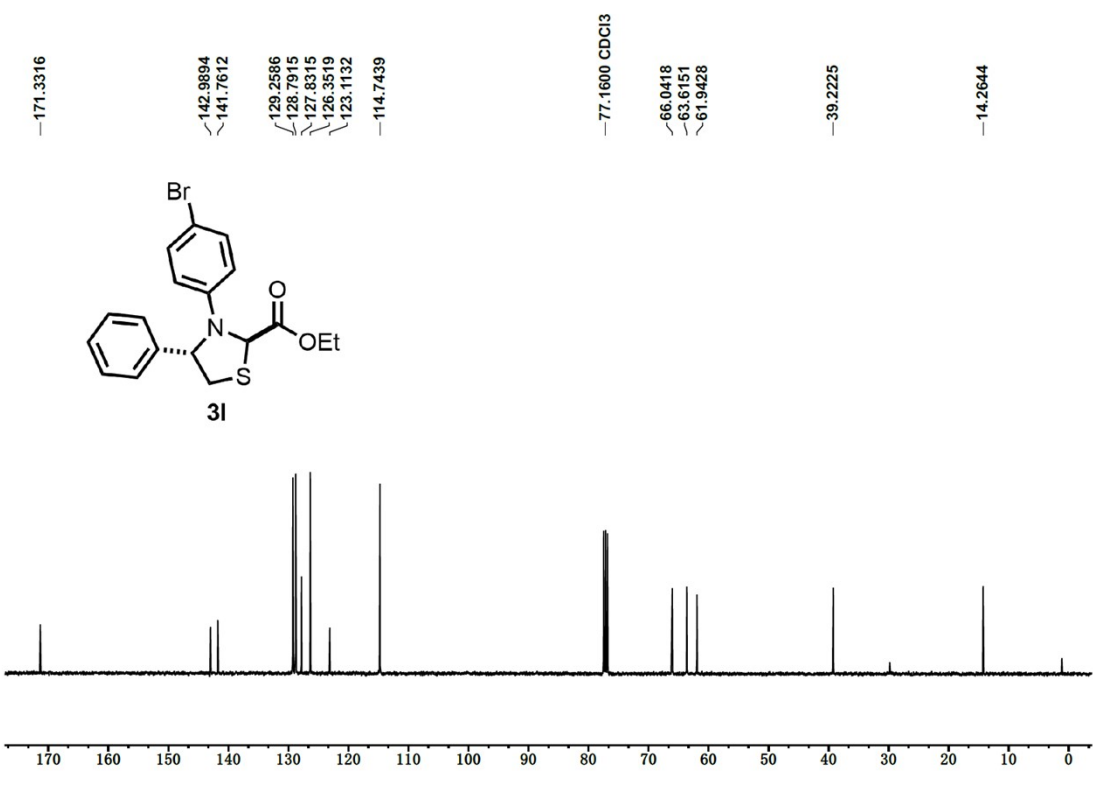

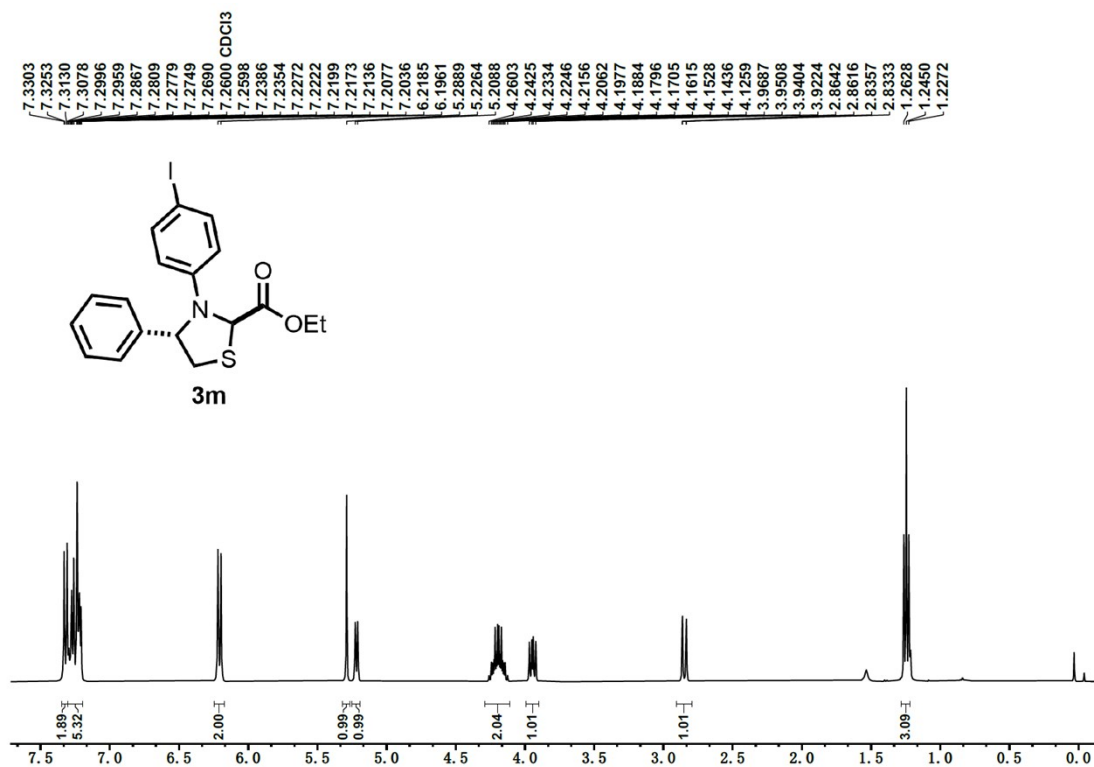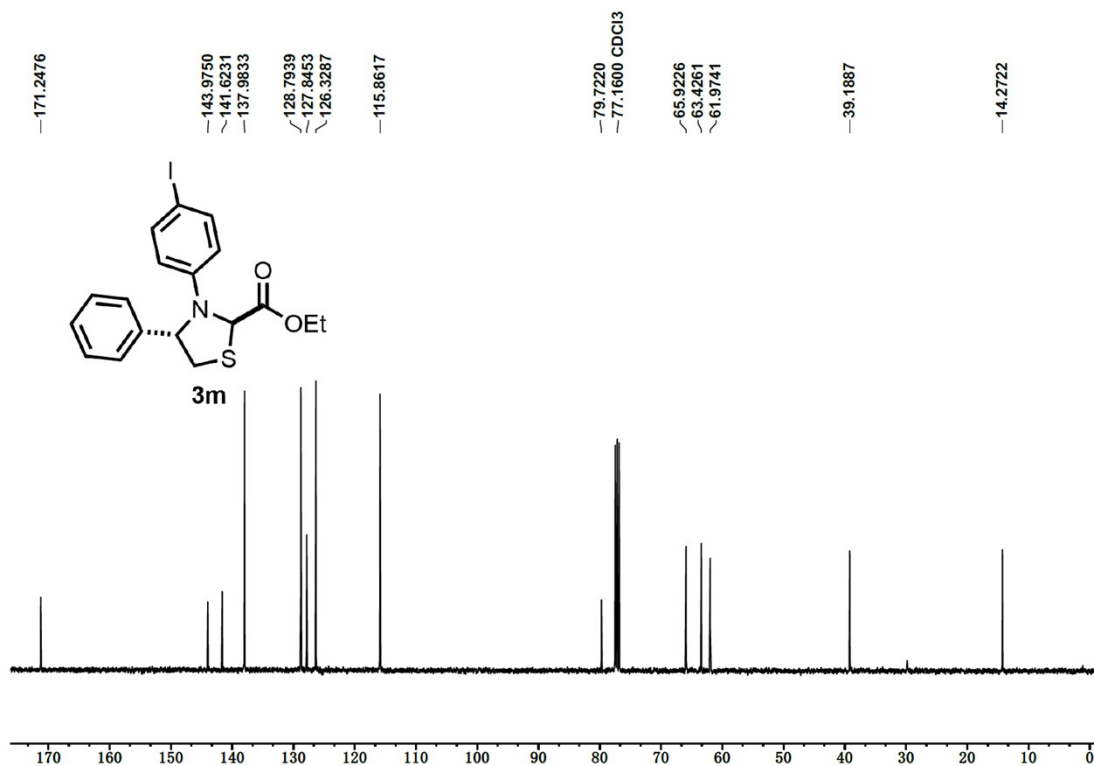

7.3548  
7.3514  
7.3474  
7.3373  
7.3337  
7.3302  
7.3233  
7.3167  
7.3135  
7.3072  
7.2957  
7.2909  
7.2871  
7.2846  
7.2806  
7.2769  
7.2698  
7.2600 CDCl3  
6.9202  
6.8991  
6.8778  
6.1773  
6.1572  
6.1536  
6.1509  
5.3354  
5.2678  
5.2501  
4.3201  
4.3022  
4.2932  
4.2844  
4.2753  
4.2667  
4.2579  
4.2411  
4.2322  
4.2236  
4.2145  
4.2058  
4.1967  
4.1790  
4.0228  
4.0048  
3.9945  
3.9765  
2.9048  
2.9022  
2.8763  
2.8737  
2.0932  
2.0887  
1.3201  
1.3024  
1.2846

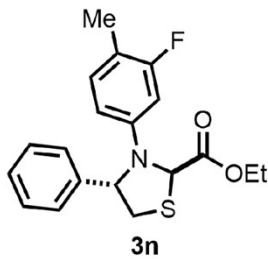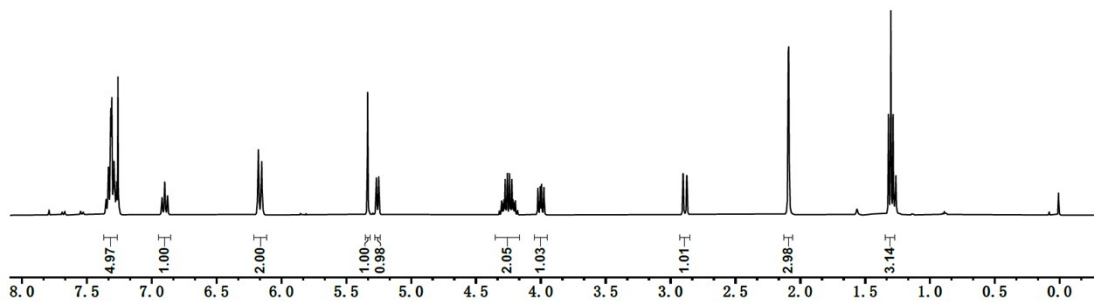

171.4413  
163.0947  
160.6858  
144.0462  
143.9420  
142.0067  
131.9516  
131.8812  
128.7732  
127.7732  
126.3596  
113.7962  
113.6201  
109.0999  
109.0719  
101.1706  
100.8937  
77.1600 CDCl3  
66.0224  
63.6016  
61.8937  
39.1939  
14.2687  
13.6317  
13.6010

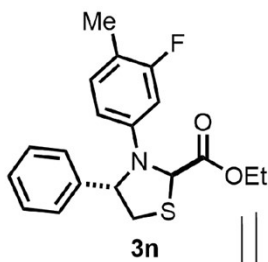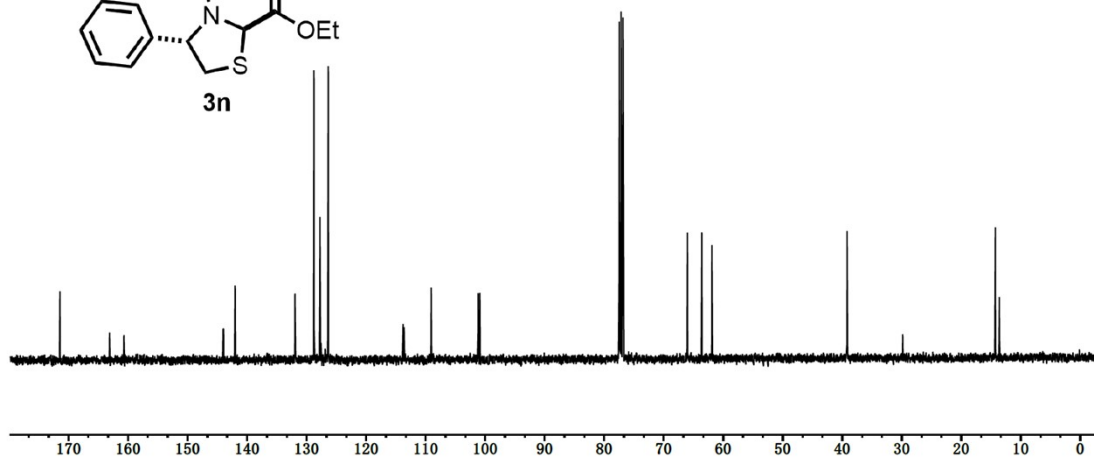



115.8463

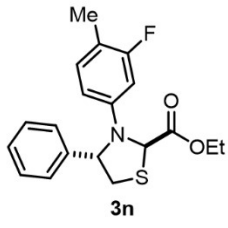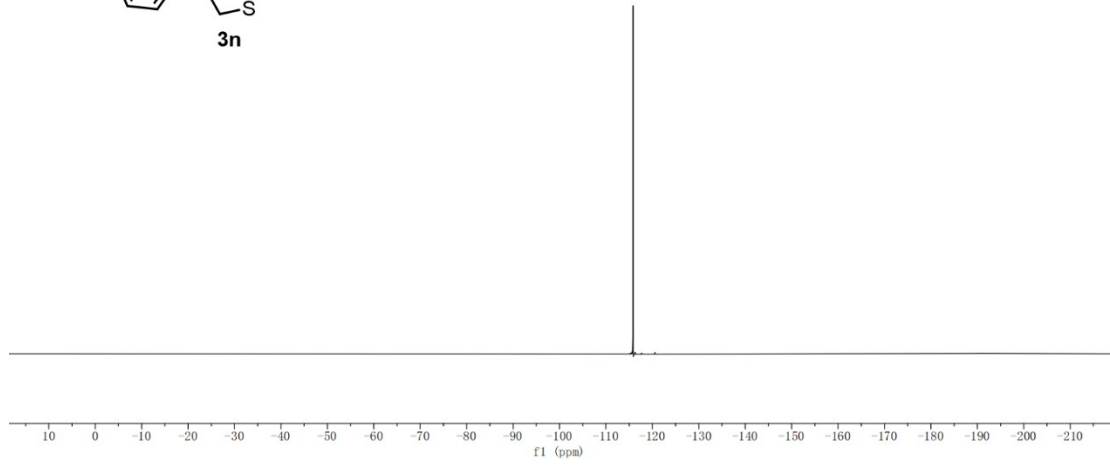

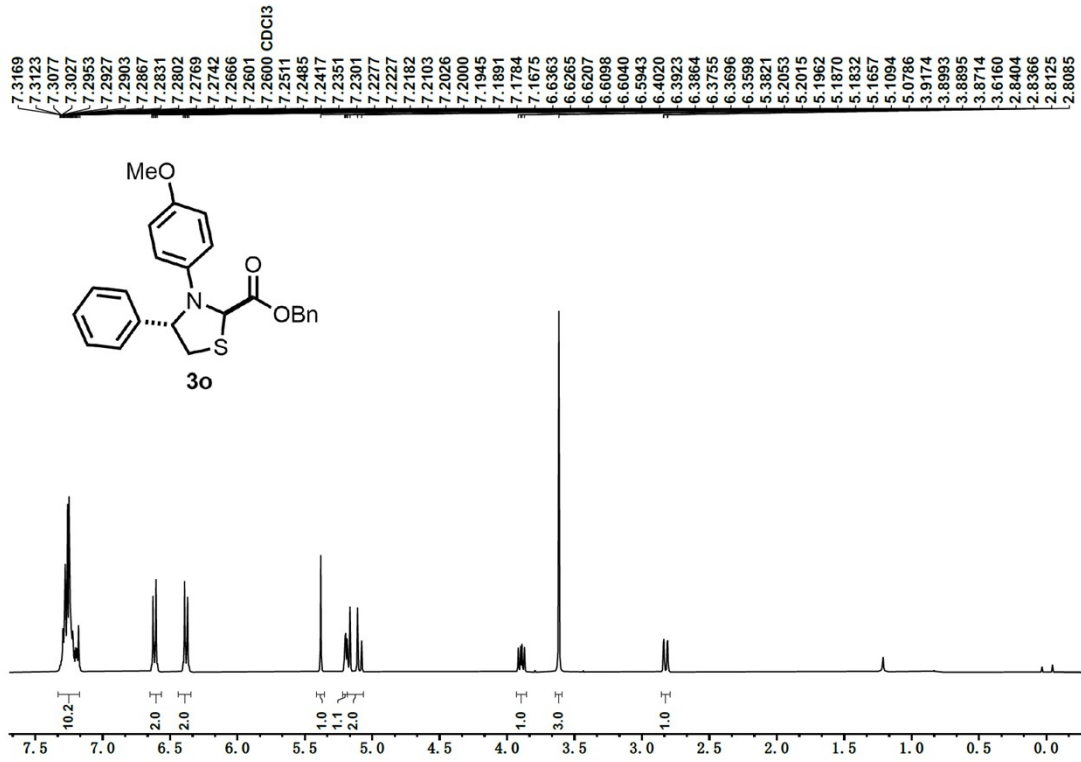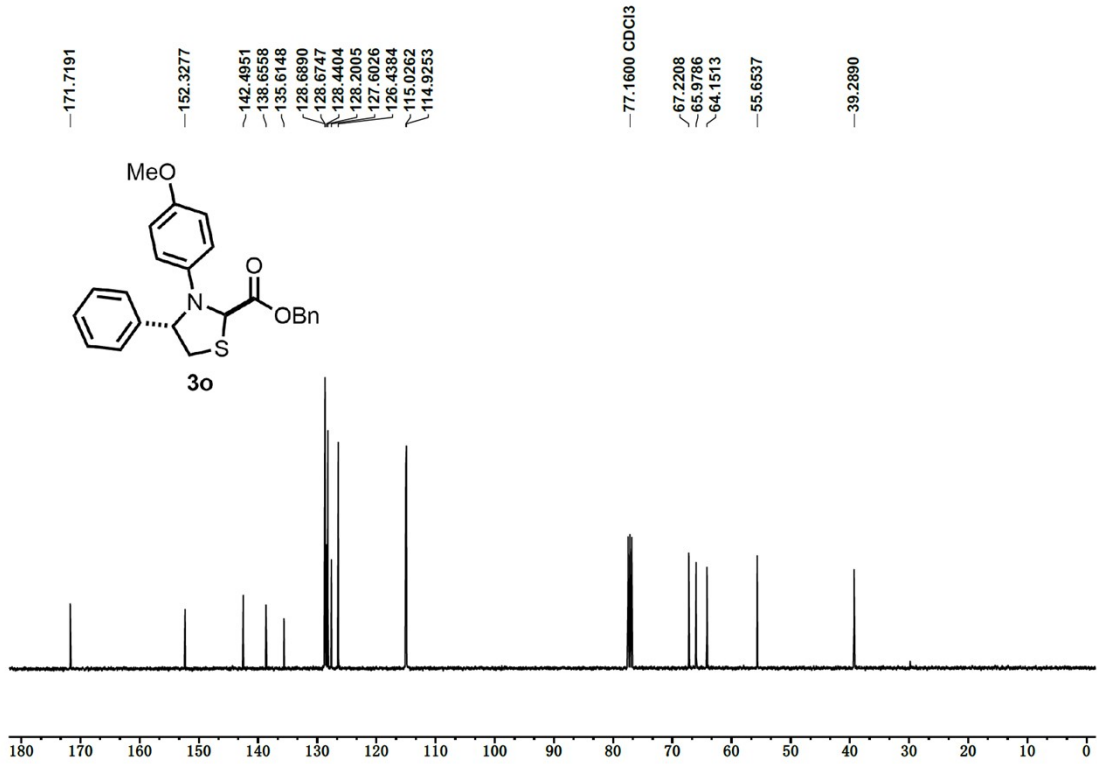

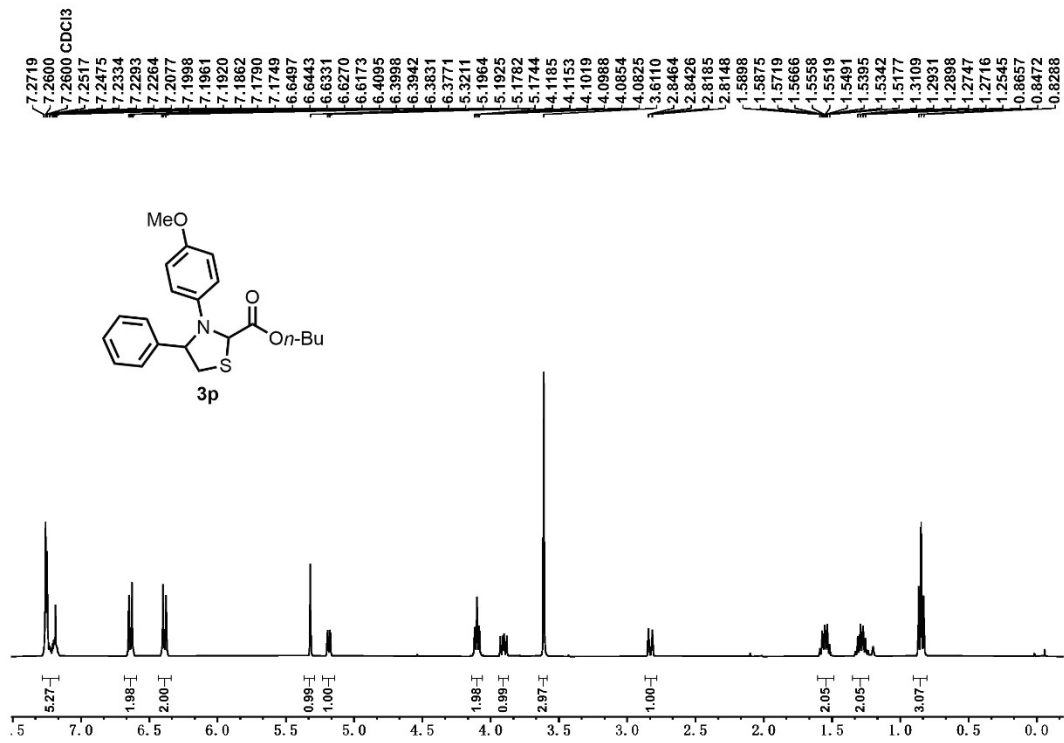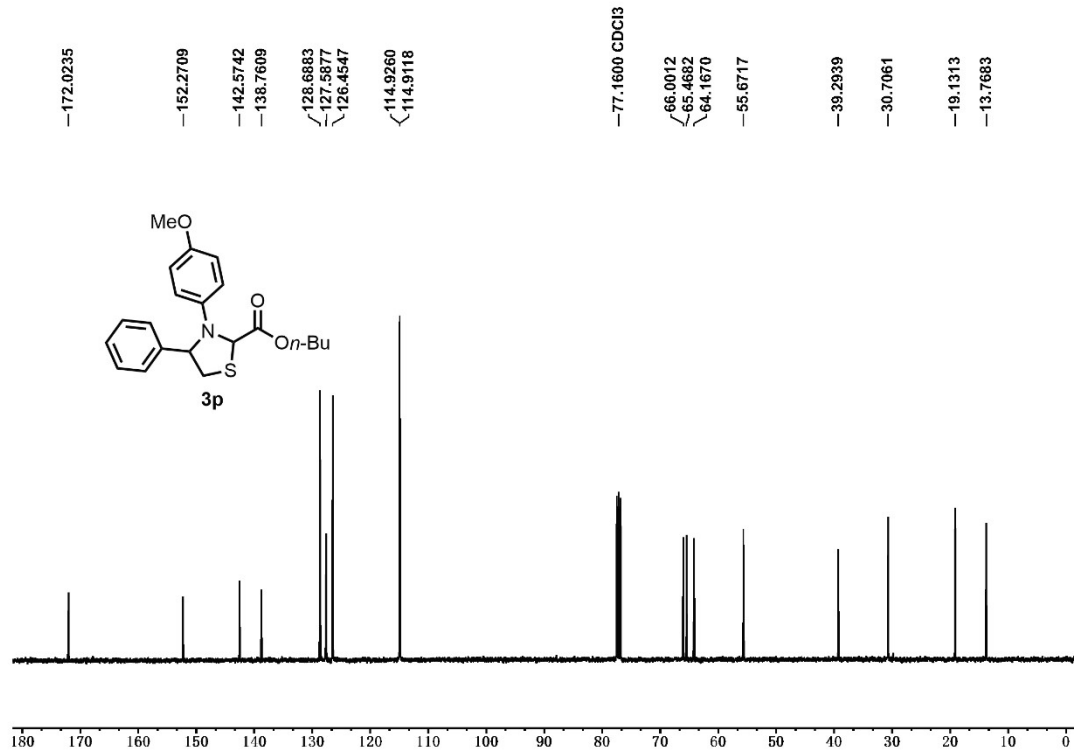

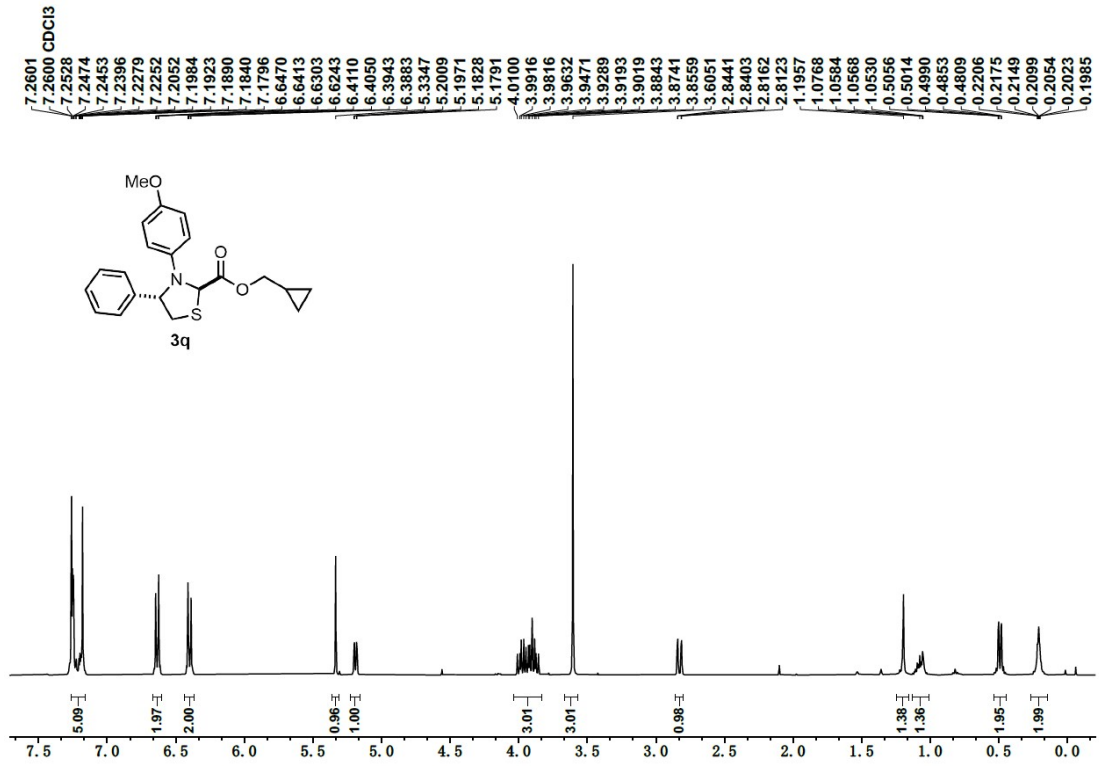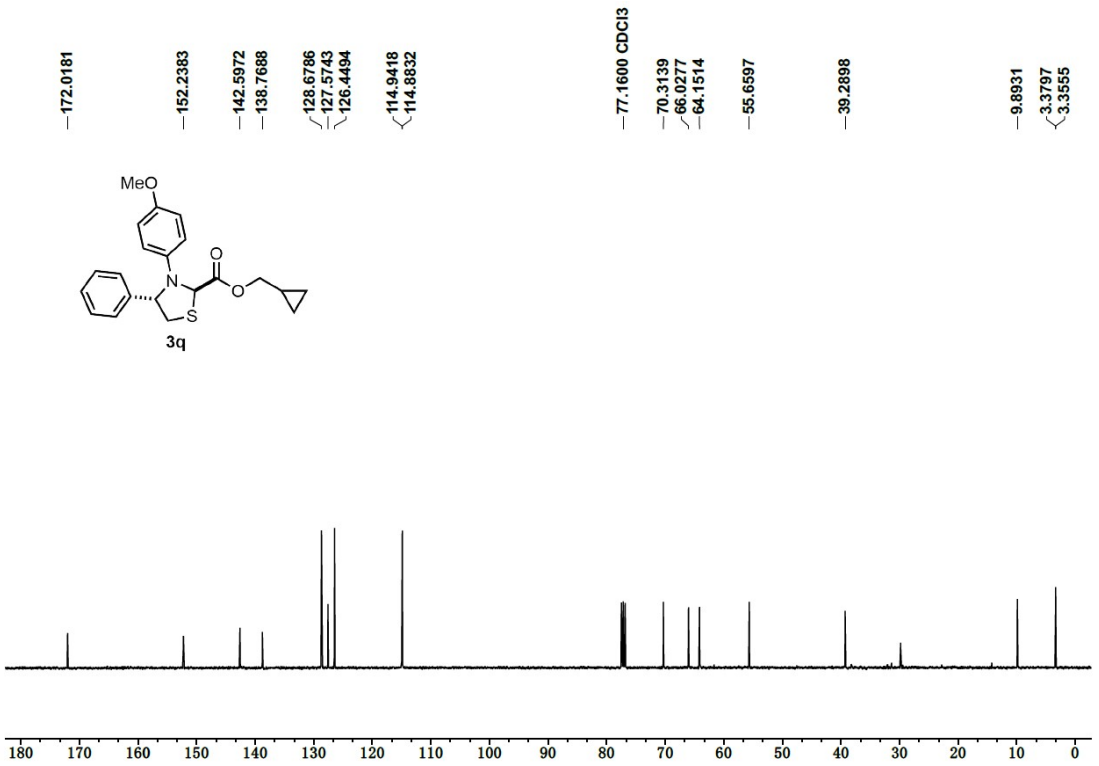

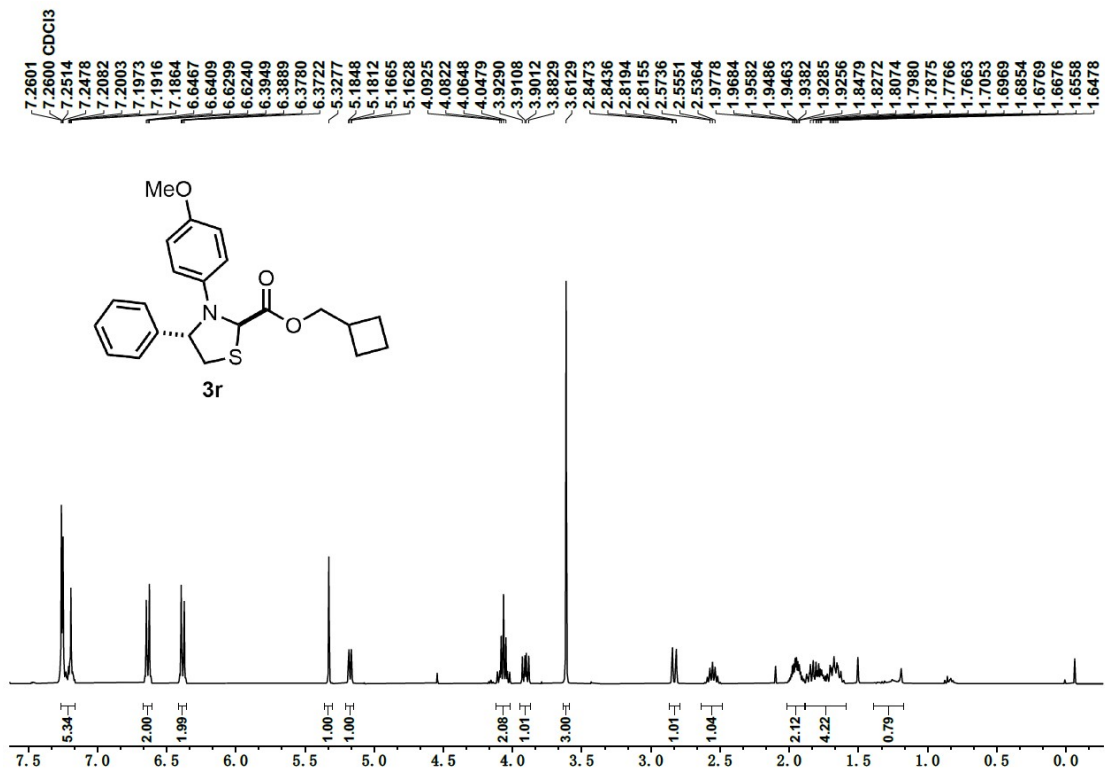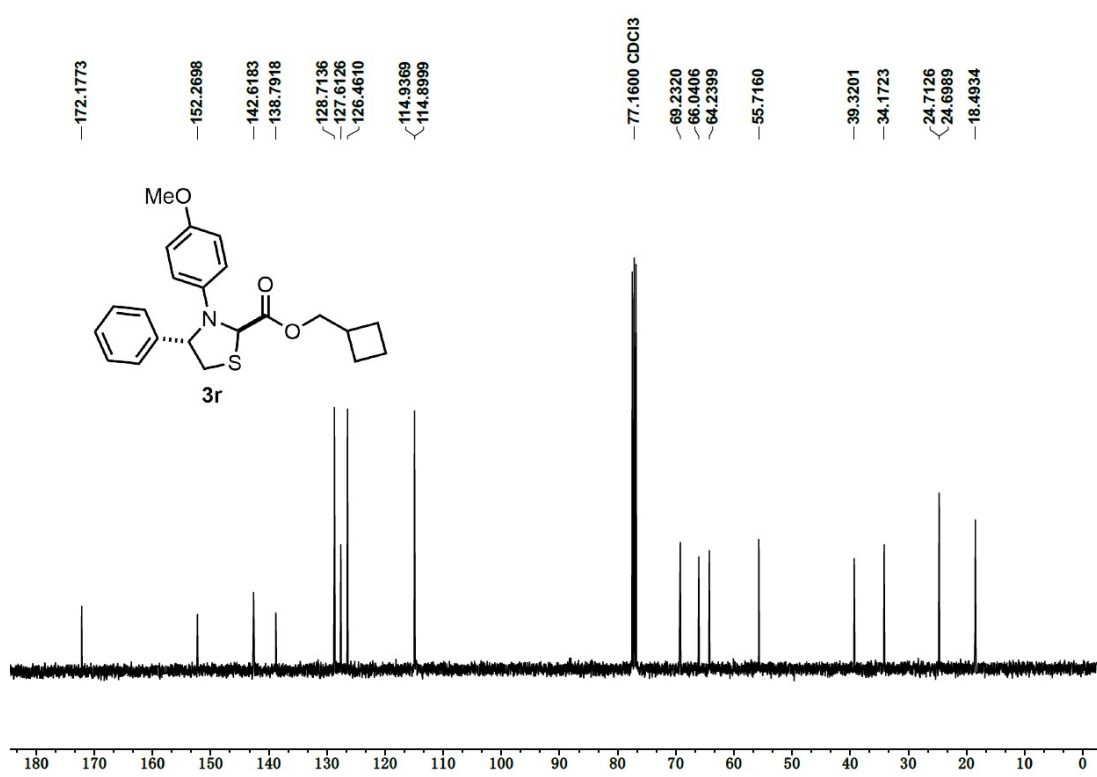

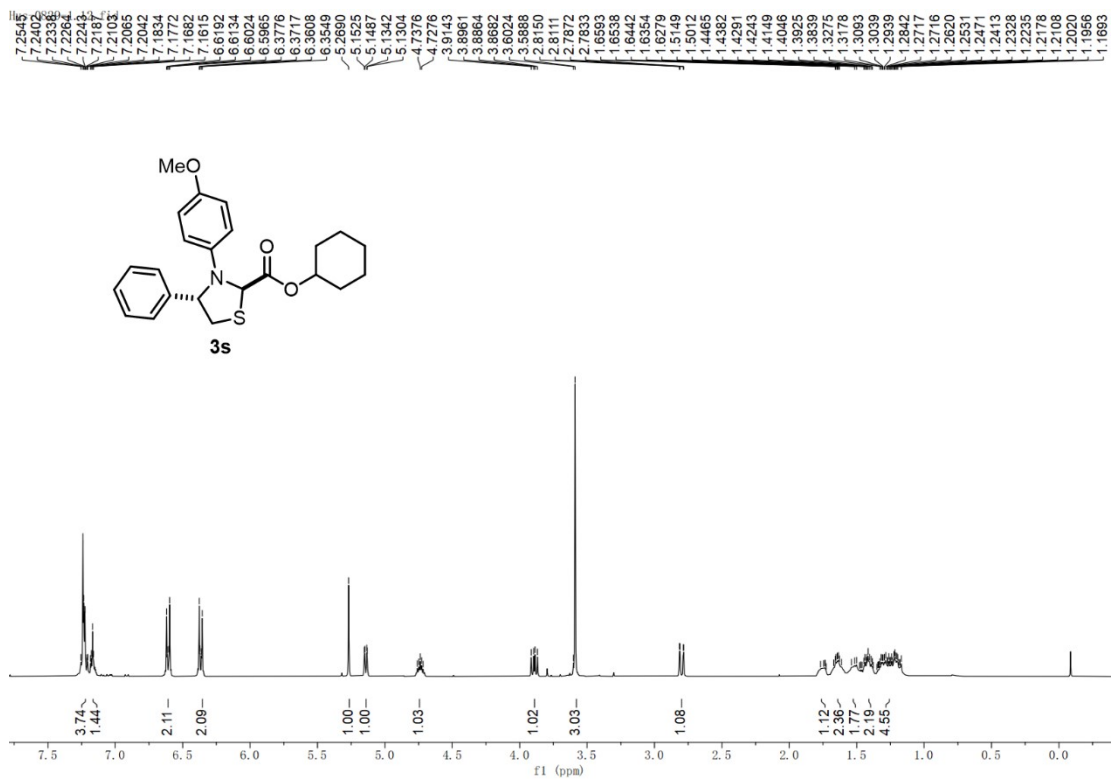

llys-0829-1.13.fid

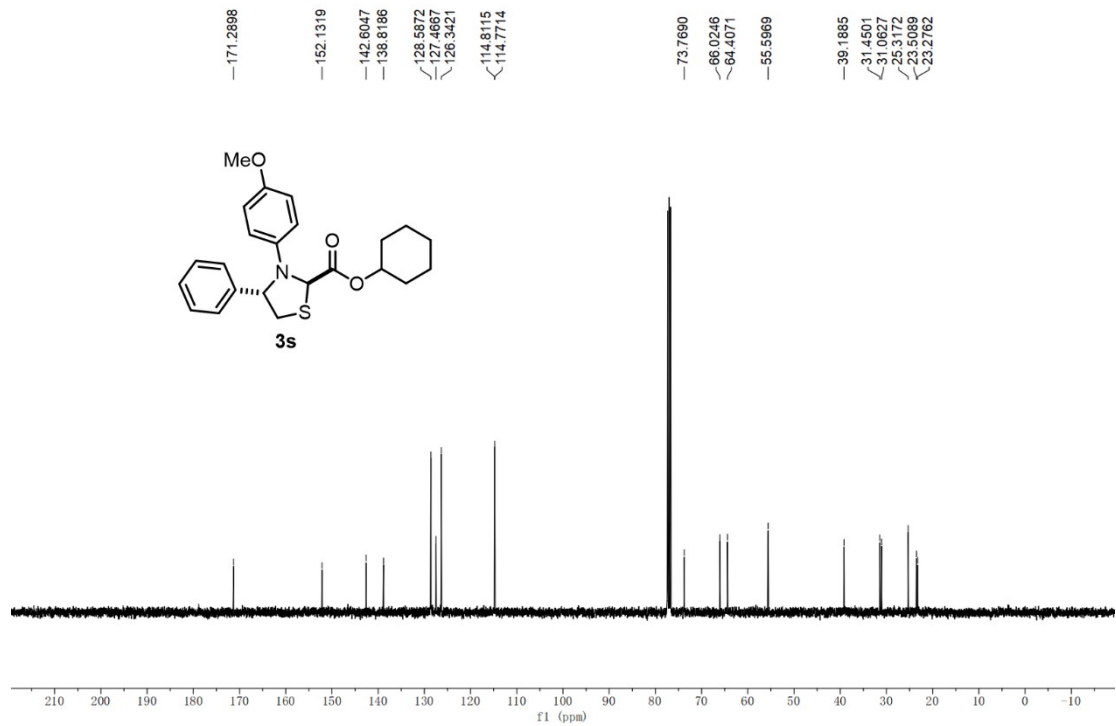

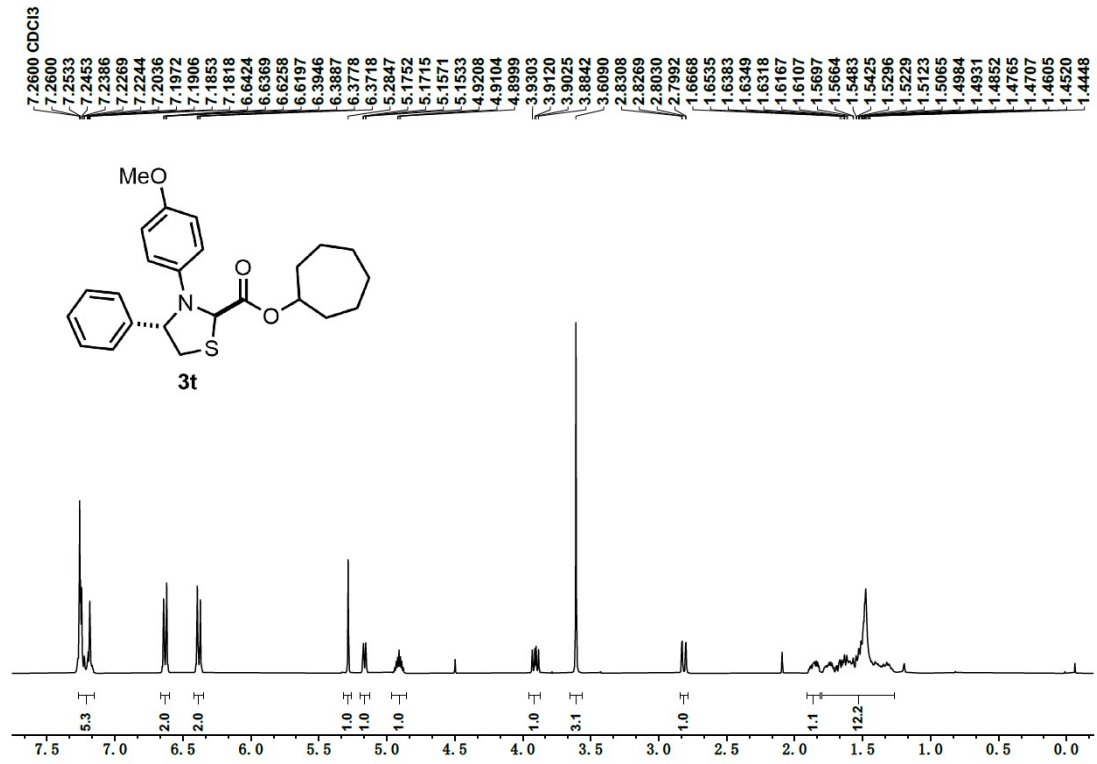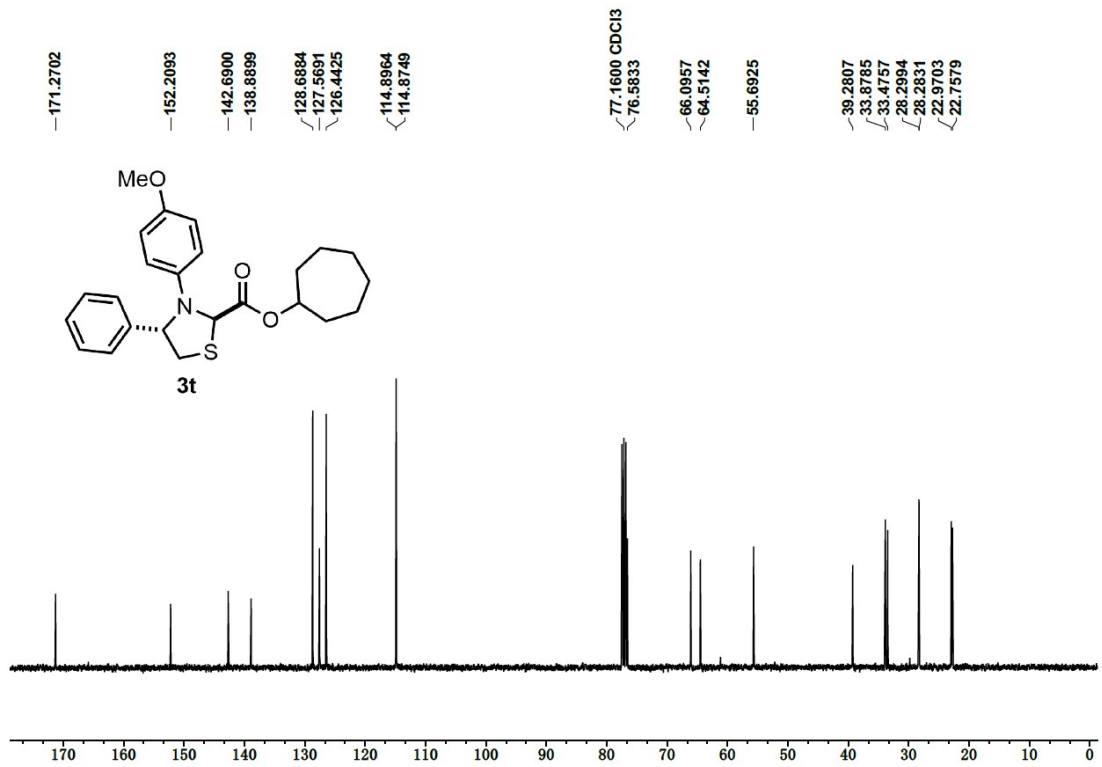

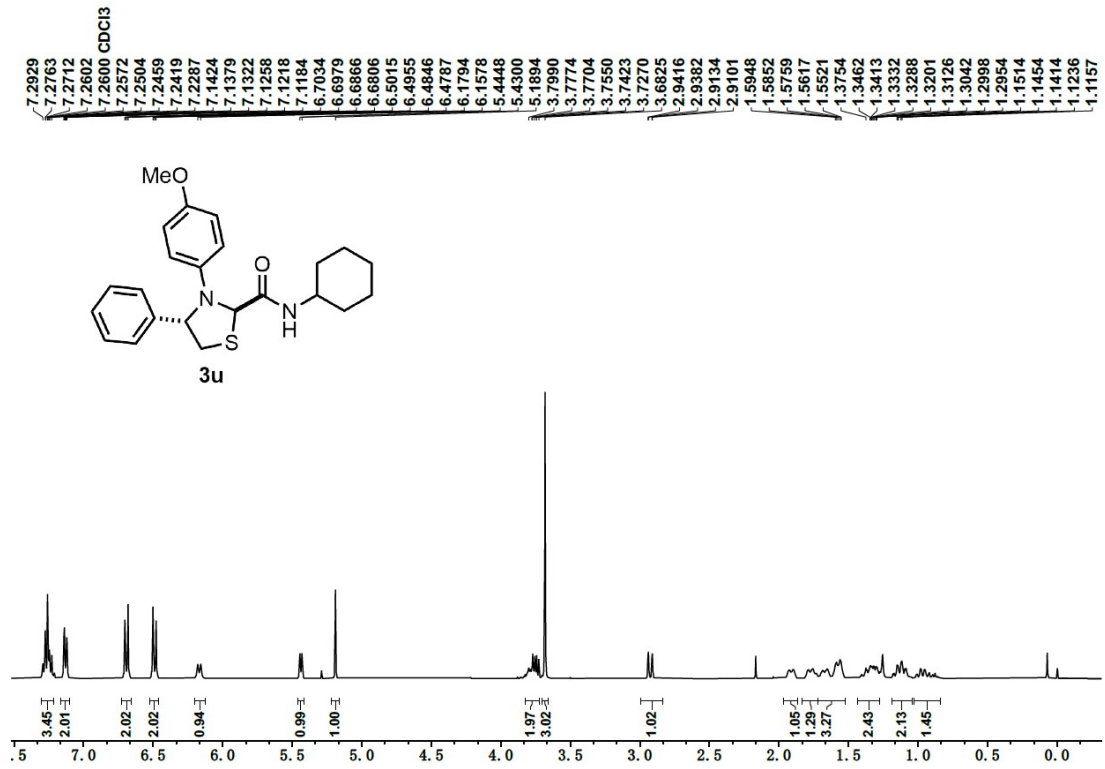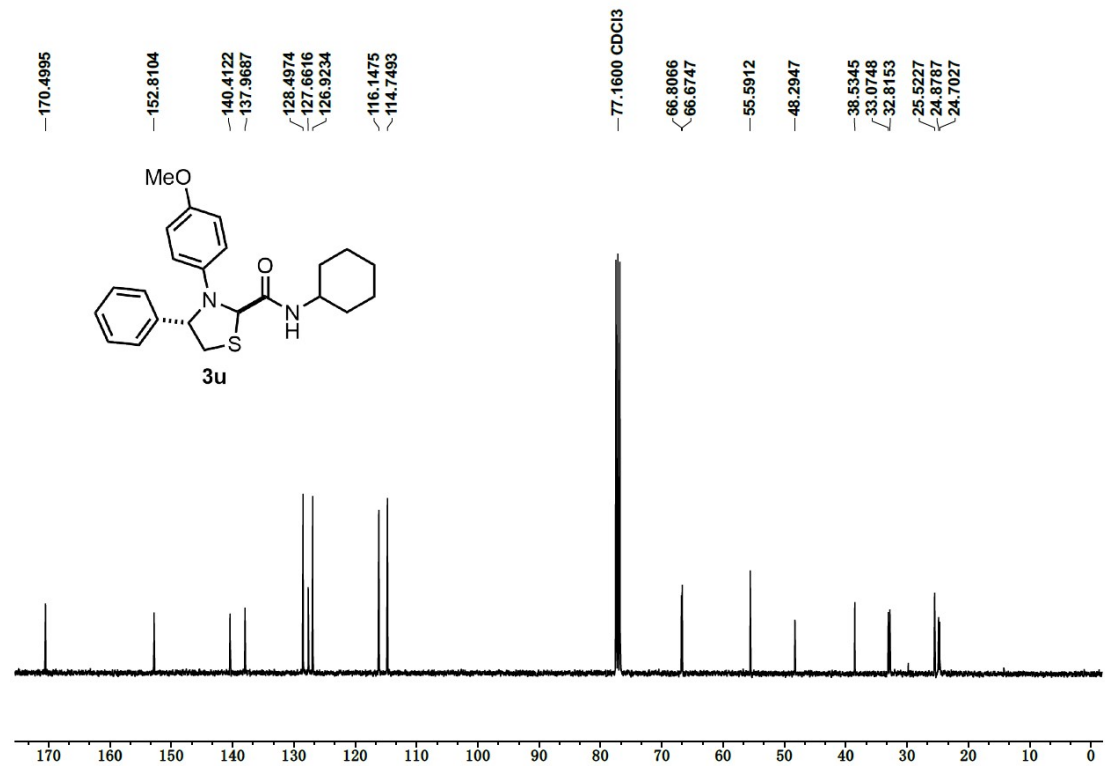



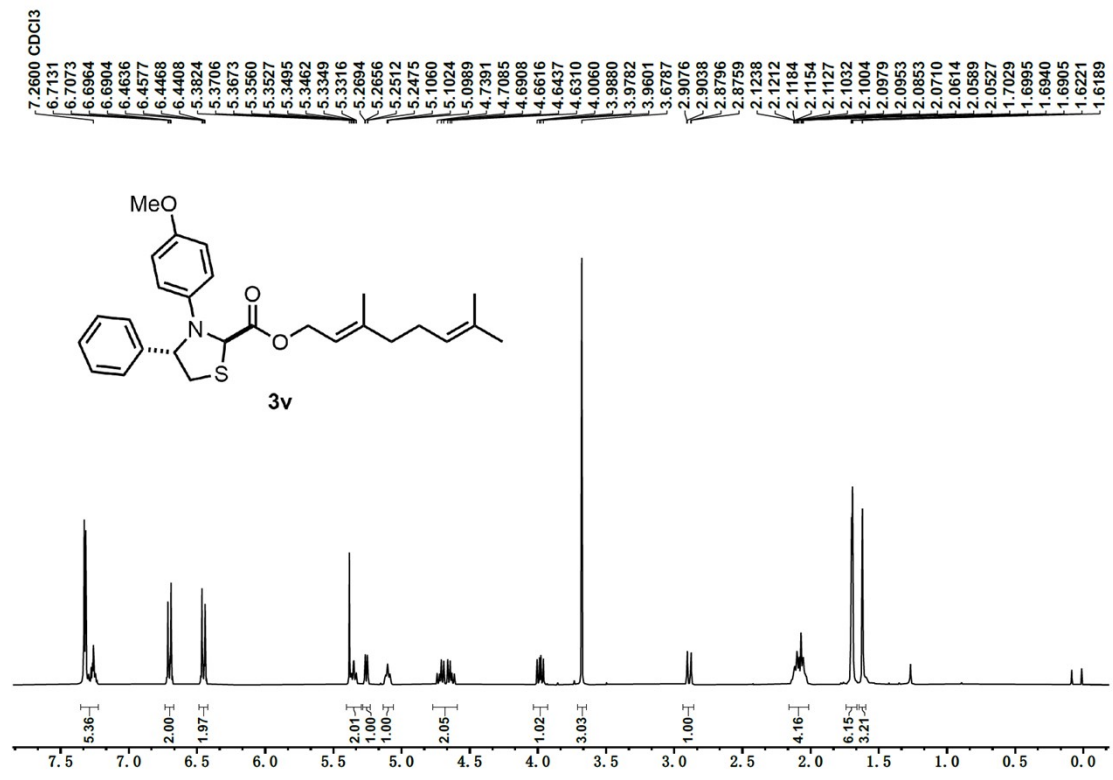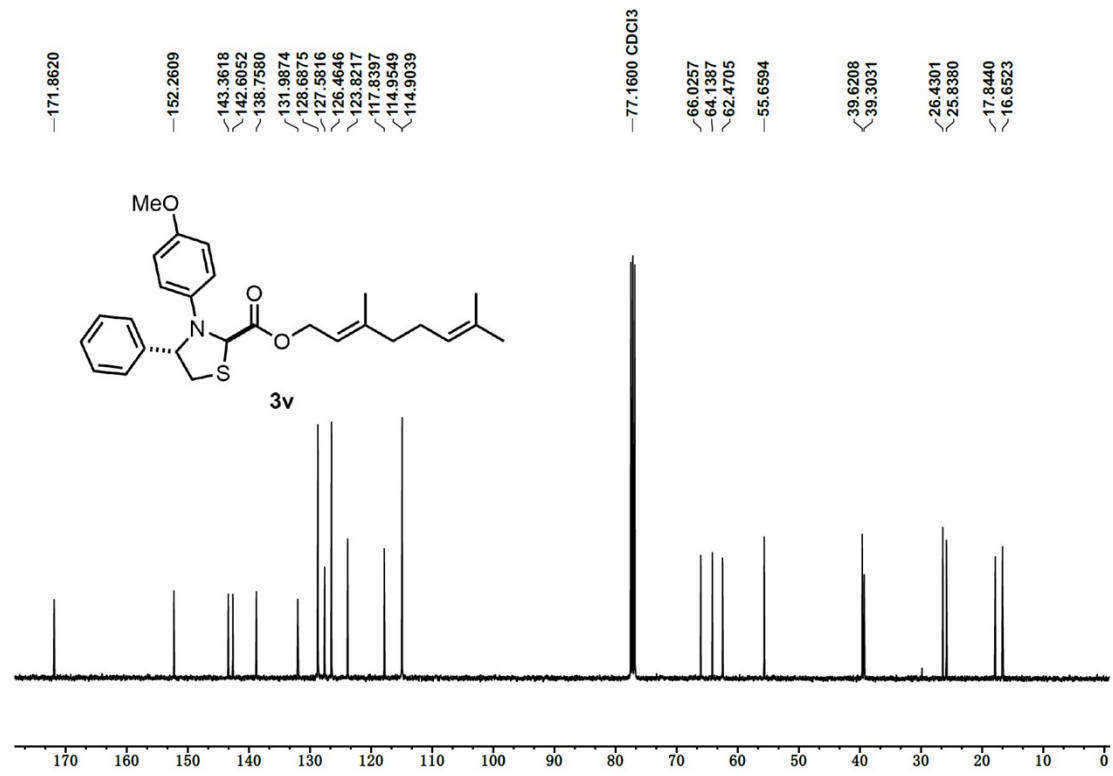

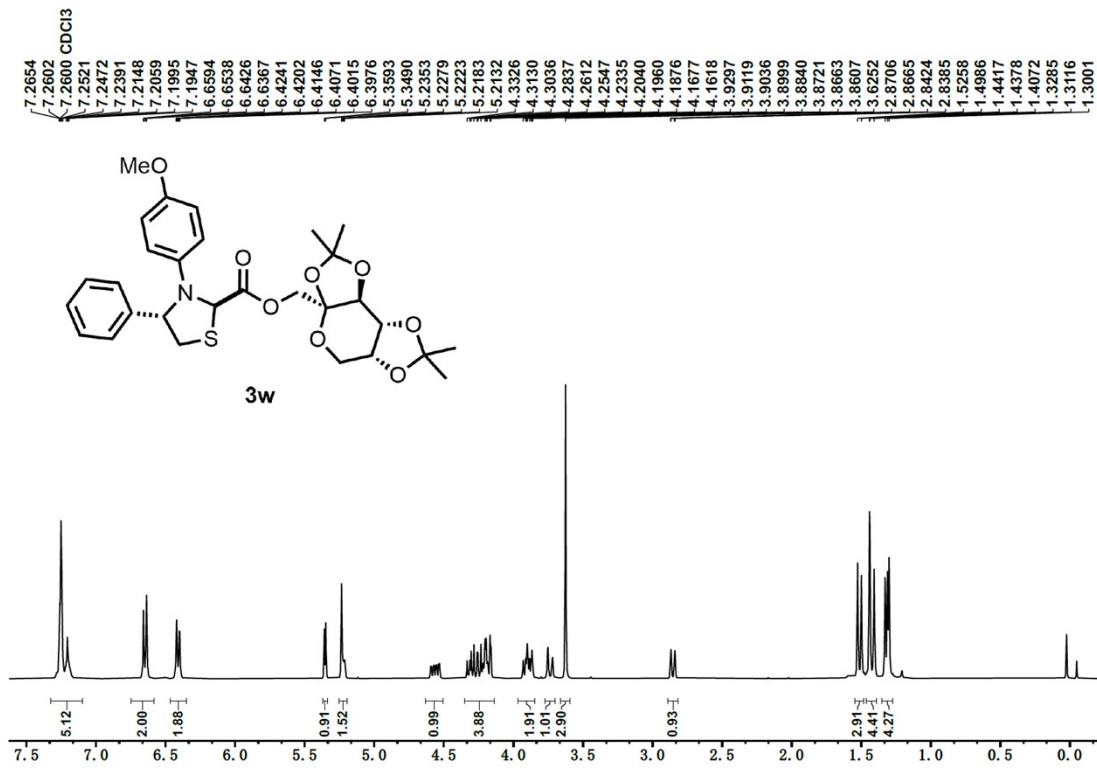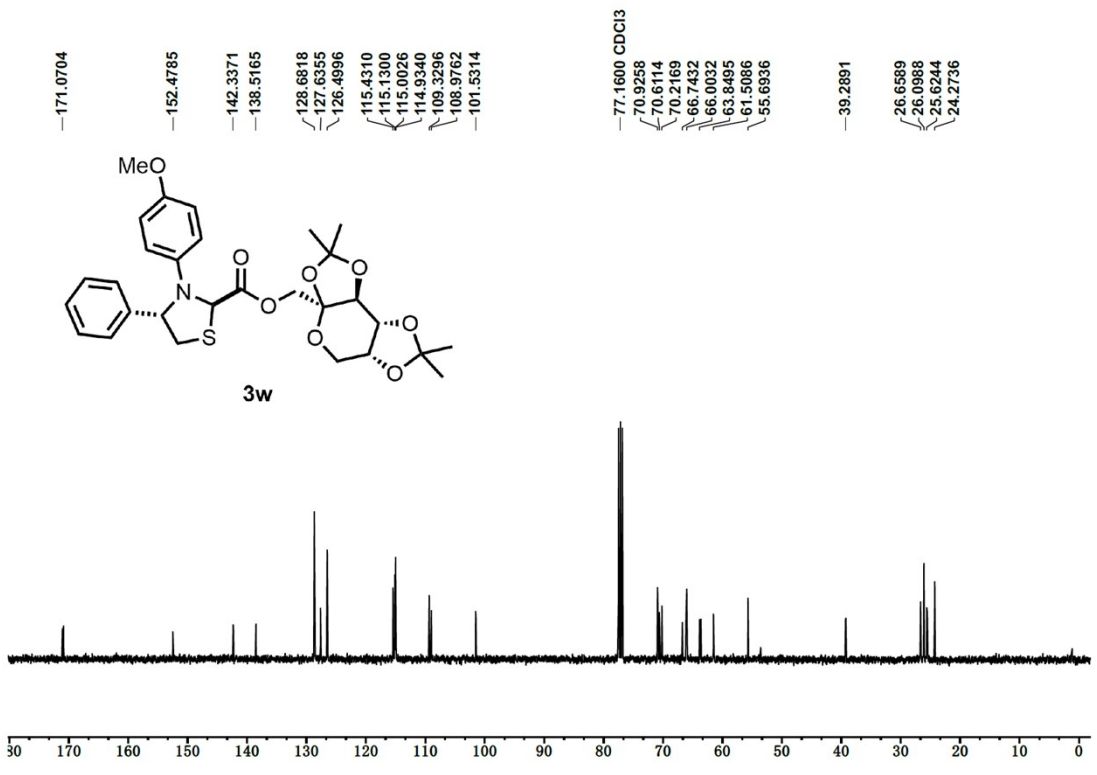

7.3165  
7.3148  
7.3062  
7.2987  
7.2948  
7.2914  
7.2858  
7.2610  
7.2570  
7.2522  
7.2453  
7.2420  
7.2389  
7.2355  
7.2253  
7.2214  
7.2100  
7.2080  
7.2020  
7.1955  
7.1895  
7.1866  
7.1745  
7.1709  
7.1638  
7.1598  
7.1441  
7.1403  
7.1253  
7.1205  
7.1069  
7.1021  
7.0025  
6.9977  
6.9839  
6.9789  
6.9649  
6.9596  
6.9539  
6.9458  
6.9379  
6.9172  
6.9136  
5.5431  
5.5272  
5.5217  
5.5057  
5.2728  
4.1648  
4.1559  
4.1470  
4.1379  
4.1201  
4.1027  
4.0853  
4.0675  
4.0584  
4.0496  
4.0407  
3.6934  
3.5875  
3.5784  
3.5624  
3.1861  
3.1646  
3.1609  
3.1396  
2.4042  
1.2219  
1.2041  
1.1864

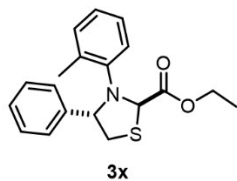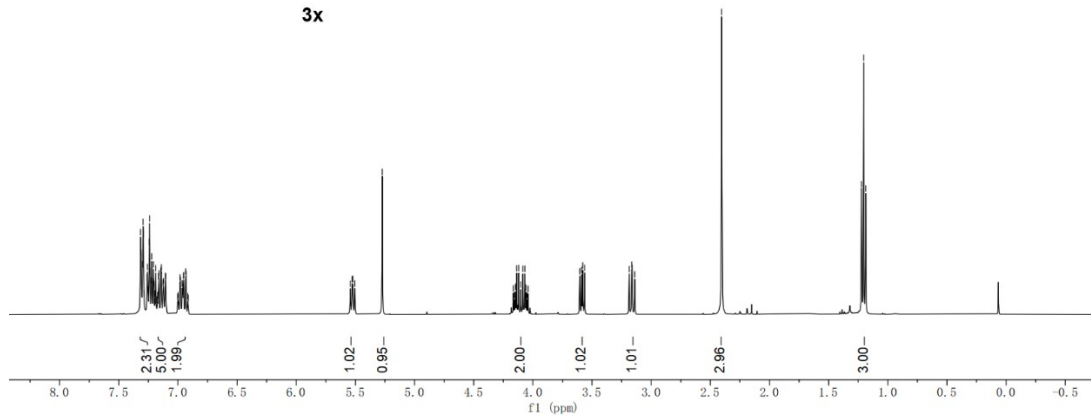

hys-0824-4.14.fid

171.4292  
142.2445  
136.6740  
134.3117  
130.6622  
128.4065  
127.5931  
127.5088  
125.7772  
125.0275  
124.5832  
66.4865  
64.3081  
60.9716  
38.8824  
18.1908  
13.9874

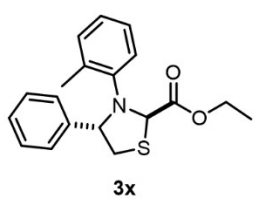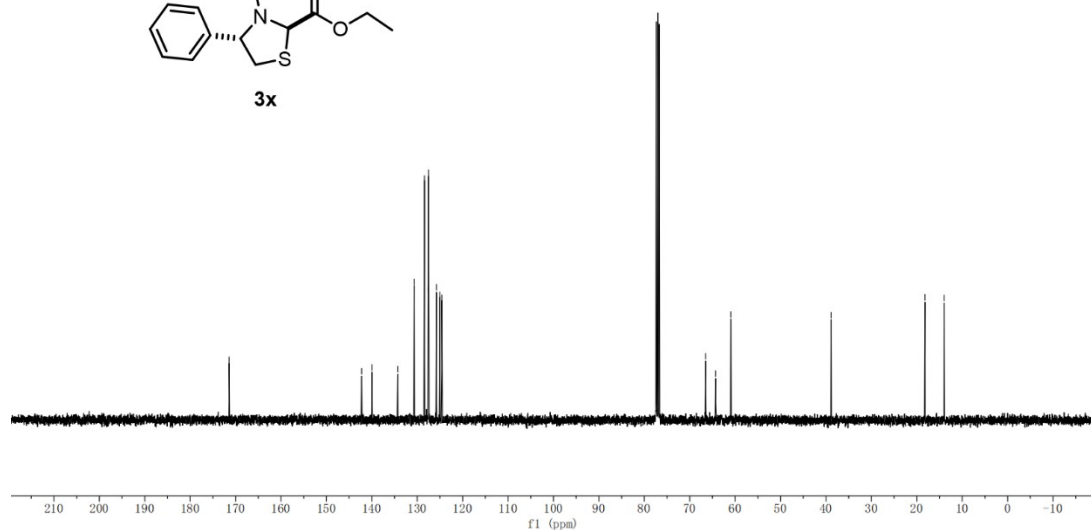

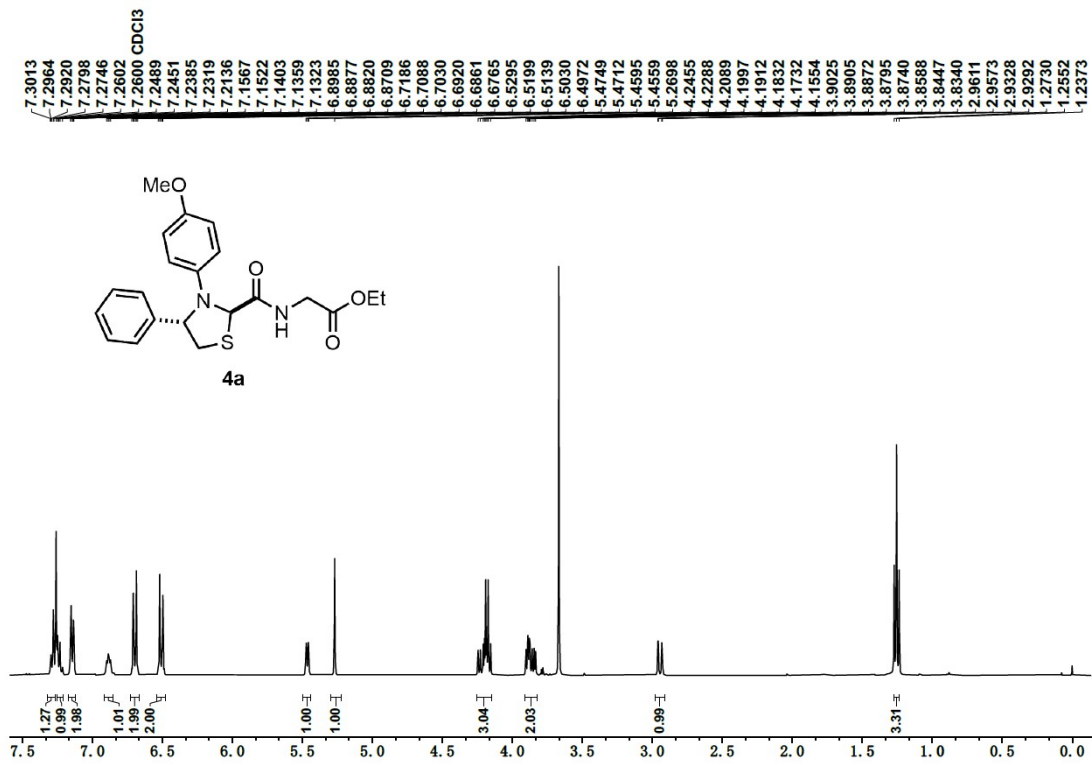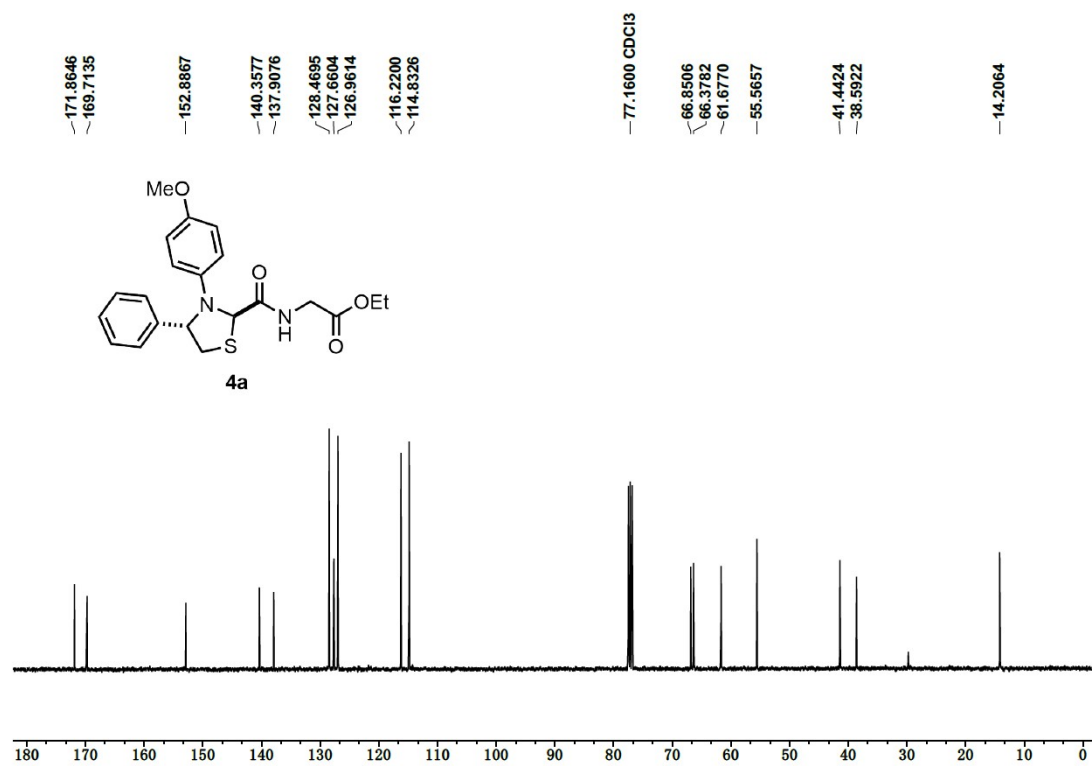

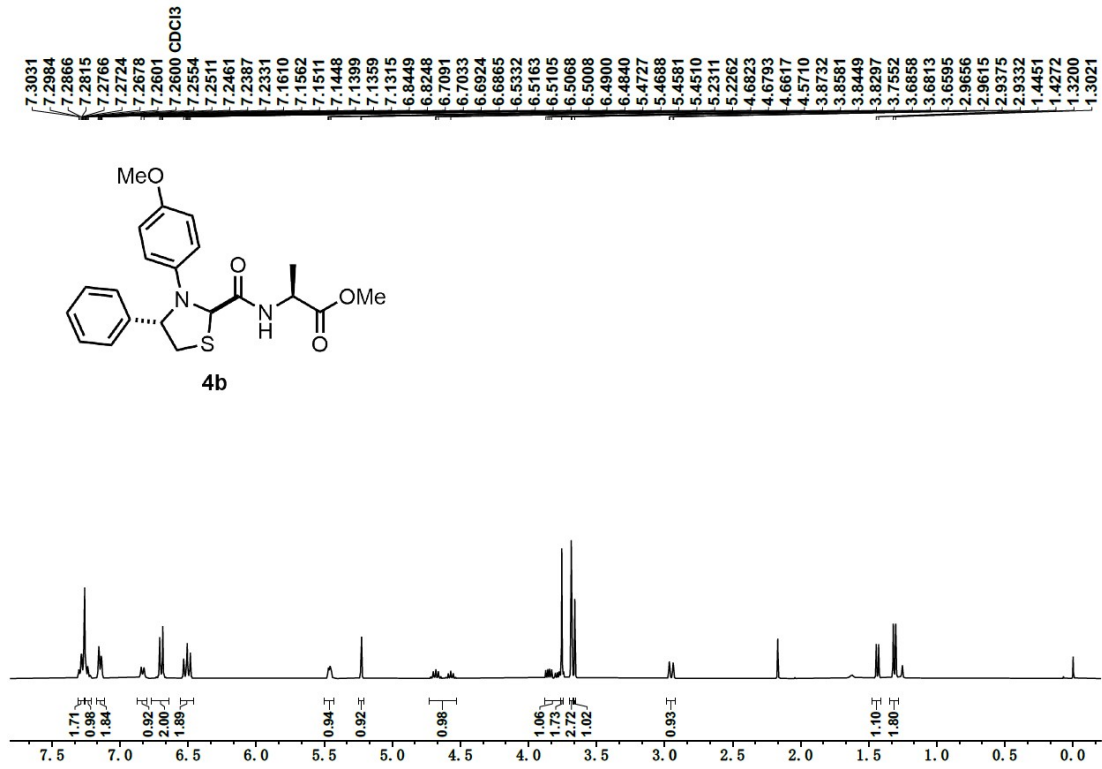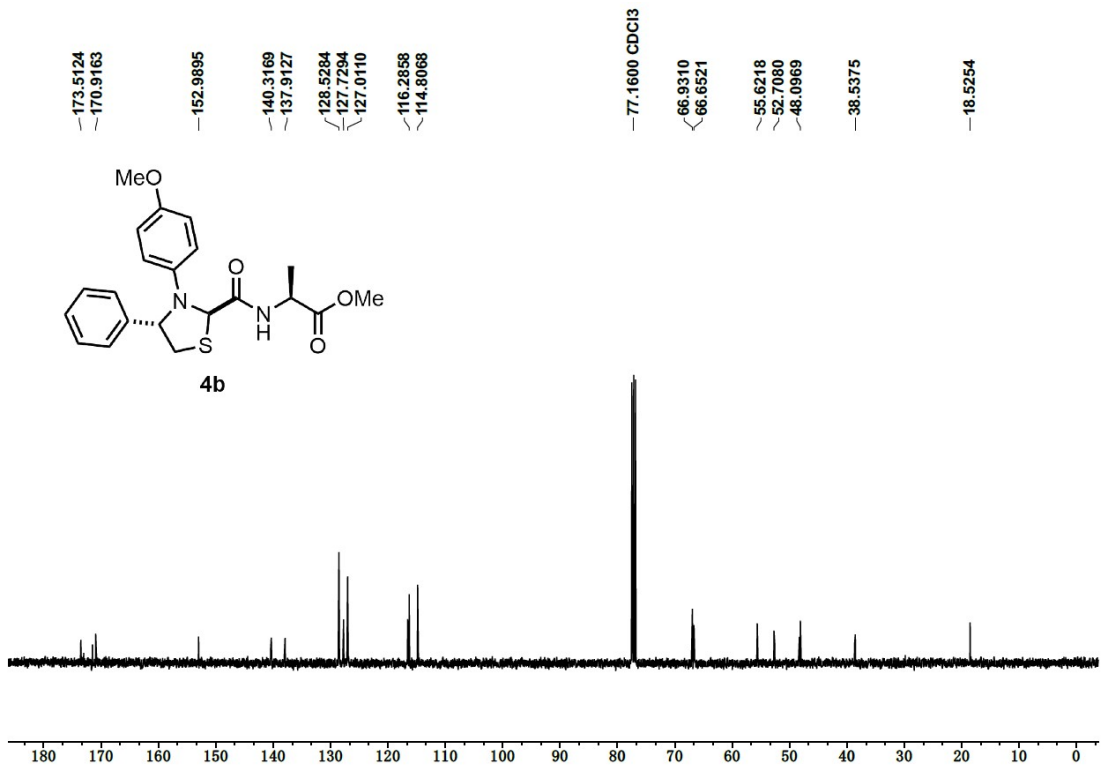

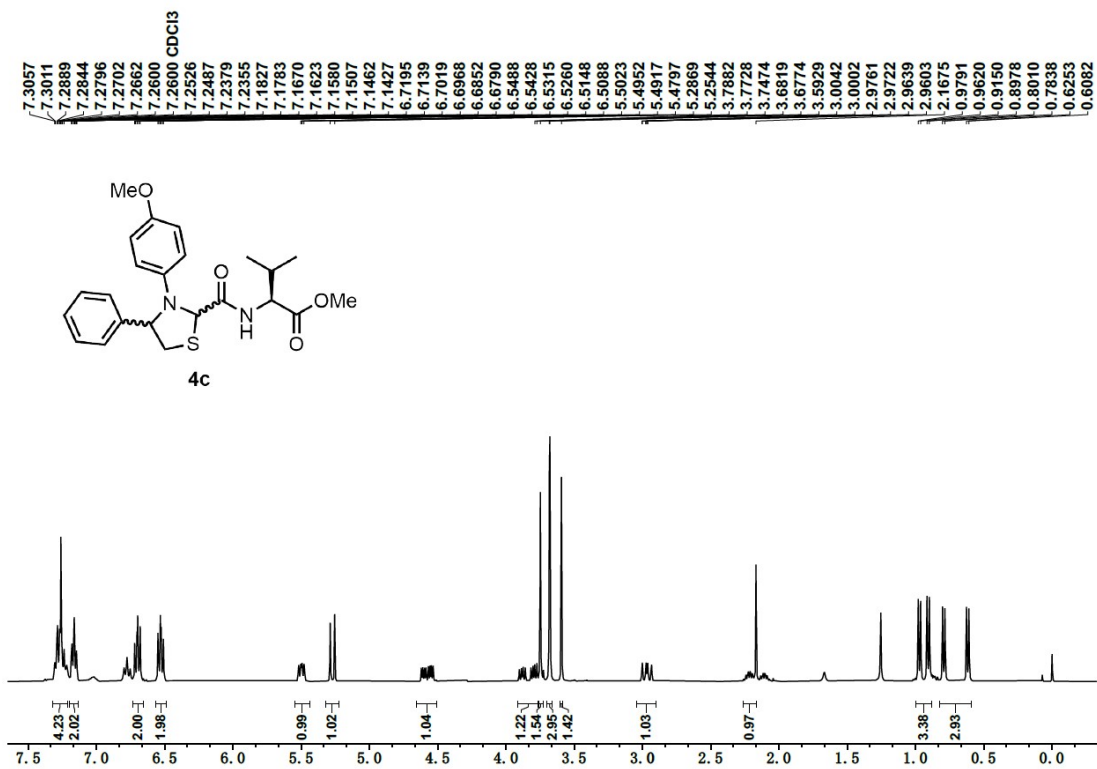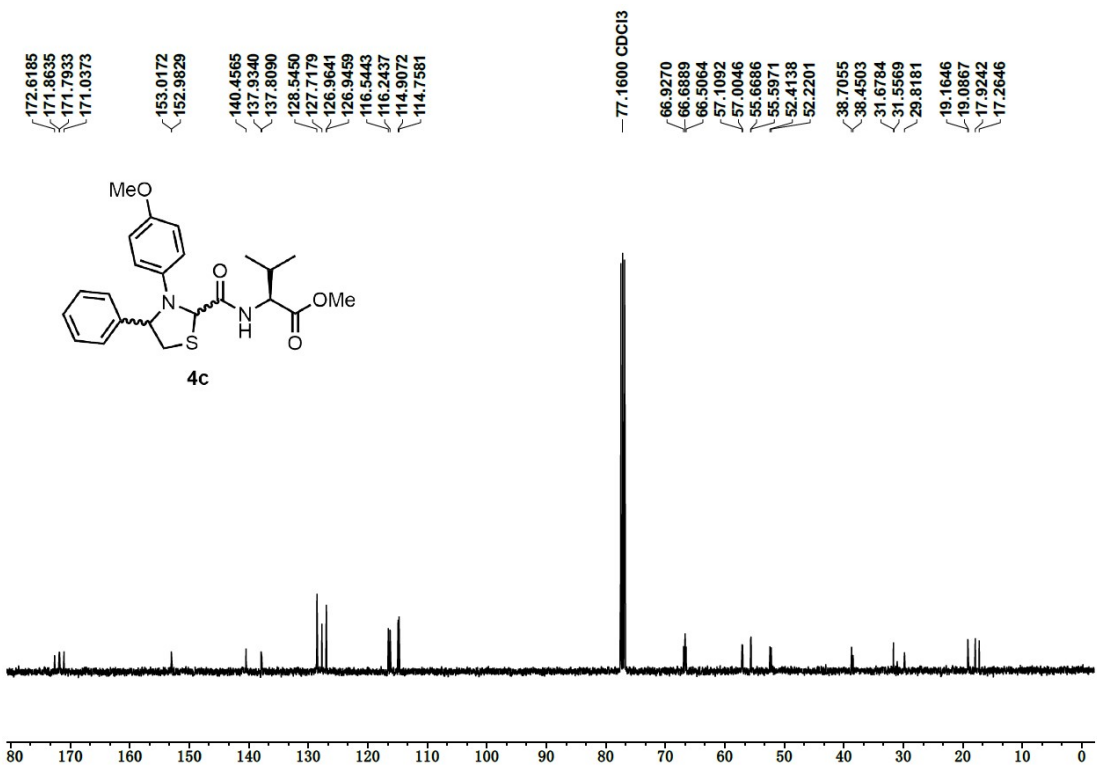

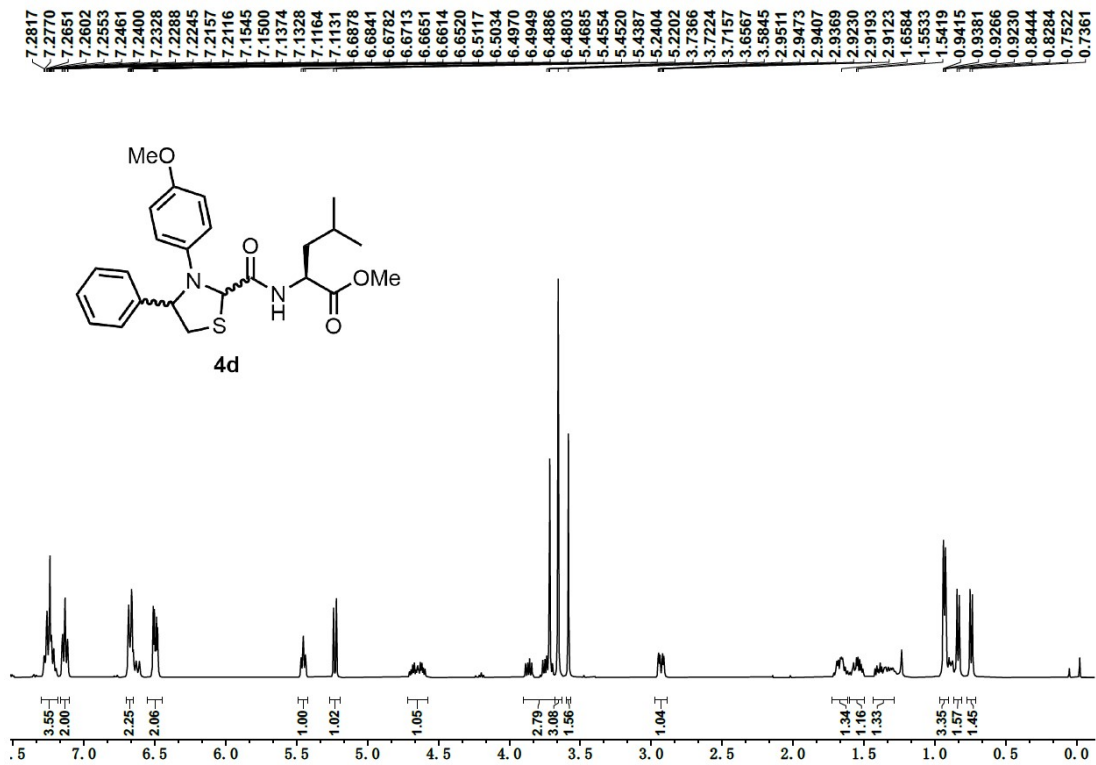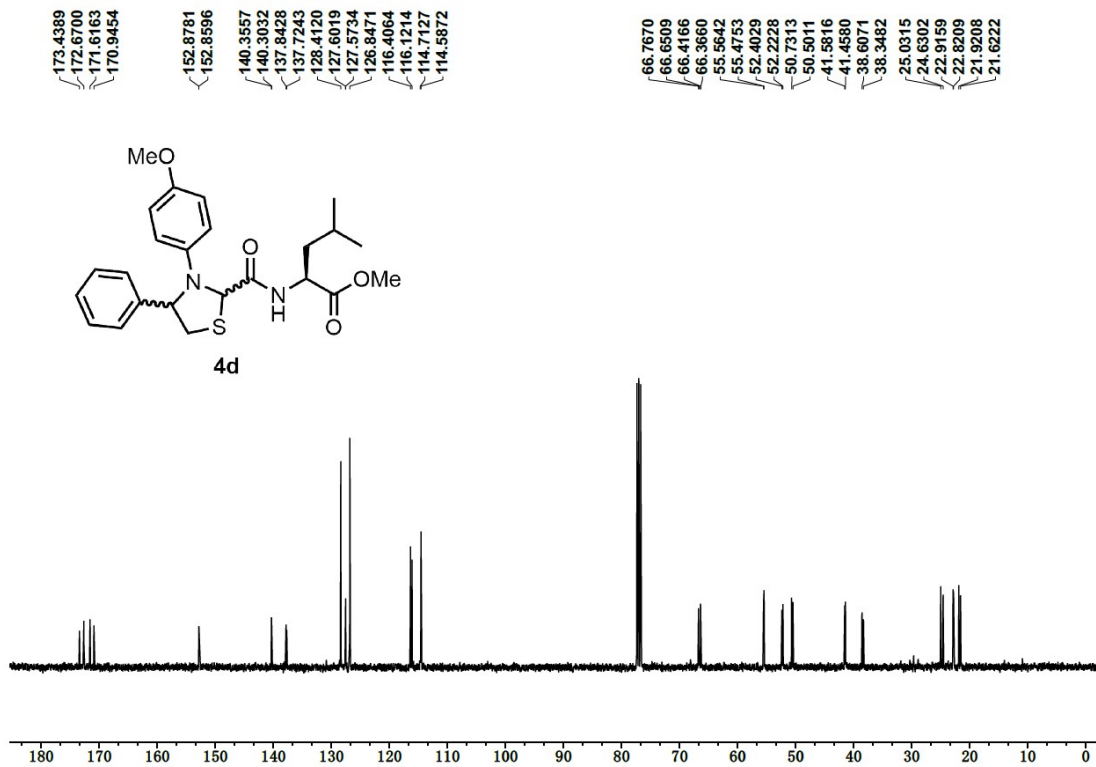

7.2875  
7.2815  
7.2763  
7.2687  
7.2639  
7.2600 CDCl3  
7.2599  
7.2540  
7.2494  
7.2449  
7.2379  
7.2318  
7.1721  
7.1677  
7.1605  
7.1559  
7.1505  
7.1397  
7.1382  
6.7193  
6.7143  
6.7079  
6.7026  
6.6969  
6.6911  
6.6853  
6.5334  
6.5276  
6.5177  
6.5109  
6.5011  
6.4953  
5.5062  
5.4921  
5.4780  
5.2618  
5.2427  
3.7614  
3.6779  
3.6473  
2.9809  
2.9774  
2.9720  
2.9687  
2.9528  
2.9492  
2.9435  
2.9401  
2.5259  
2.5210  
2.5101  
2.5076  
2.5048  
2.2451  
2.2398  
2.2360  
2.2255  
2.2210  
2.0678  
1.8571

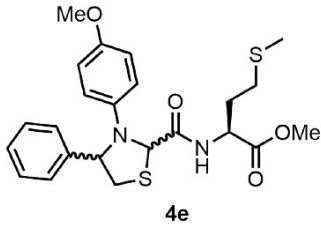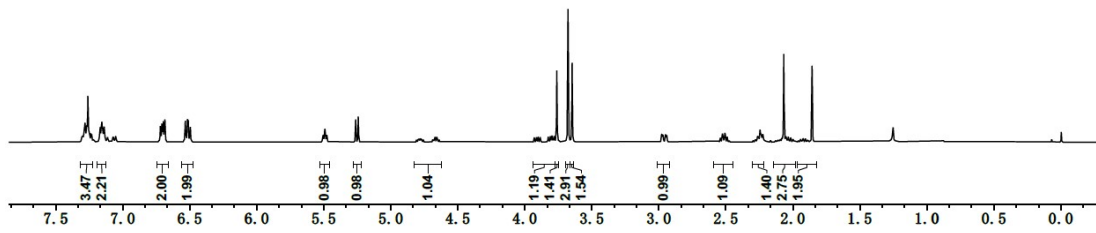

172.3635  
171.9236  
171.8450  
171.1931  
152.9545  
140.4603  
140.3953  
137.9077  
137.8253  
128.5383  
127.7321  
127.6981  
126.9312  
126.9164  
116.4477  
116.0037  
114.9358  
114.7548

77.1600 CDCl3  
66.8394  
66.6887  
66.4416  
66.3517  
55.6498  
55.5880  
52.7585  
52.6206  
51.8076  
51.5607  
38.7246  
38.5302  
31.3382  
31.0242  
30.0901  
29.7265  
15.7227  
15.2197

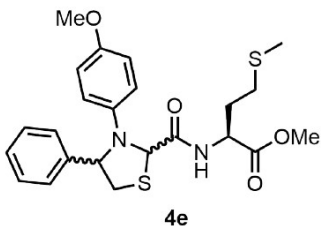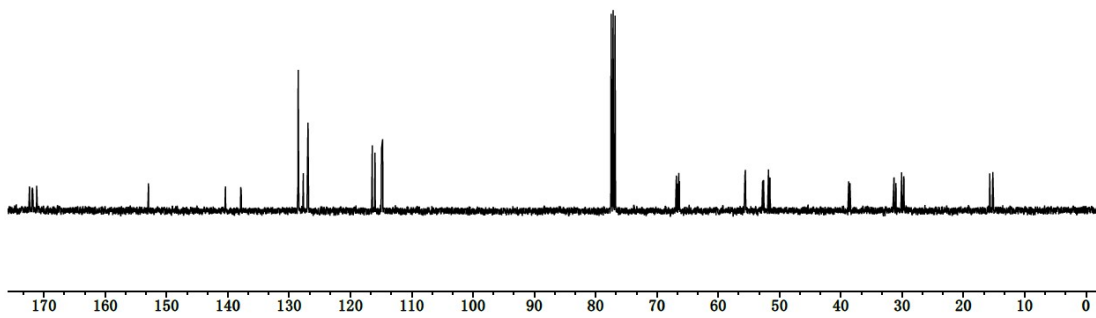



hys-0825-n5-p.14.fid

7.3409  
7.3370  
7.3272  
7.3263  
7.3155  
7.3080  
7.3011  
7.2970  
7.2887  
7.2844  
7.2797  
7.2761  
7.2725  
7.2677  
7.2615  
7.2594  
7.2549  
6.8794  
6.8663  
6.8562  
6.8466  
6.4059  
6.4006  
6.3953  
6.3894  
6.3854  
6.3787  
5.3572  
5.3514  
5.2888  
5.2714  
4.8848  
4.4692  
4.4555  
4.2811  
4.2761  
4.2722  
4.2673  
4.2634  
4.2583  
4.2544  
4.2490  
4.2404  
4.2367  
4.2312  
4.2224  
4.2191  
4.2102  
4.2043  
4.1957  
4.0162  
3.9985  
3.9882  
3.9703  
3.6512  
3.6435  
2.9167  
2.9009  
2.8964  
2.8942  
2.8662  
2.8662  
1.3916  
1.3870  
1.3033  
1.2965  
1.2866  
1.2767  
1.2676  
1.2609

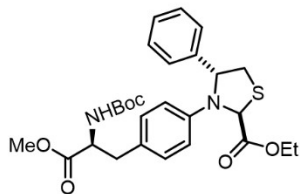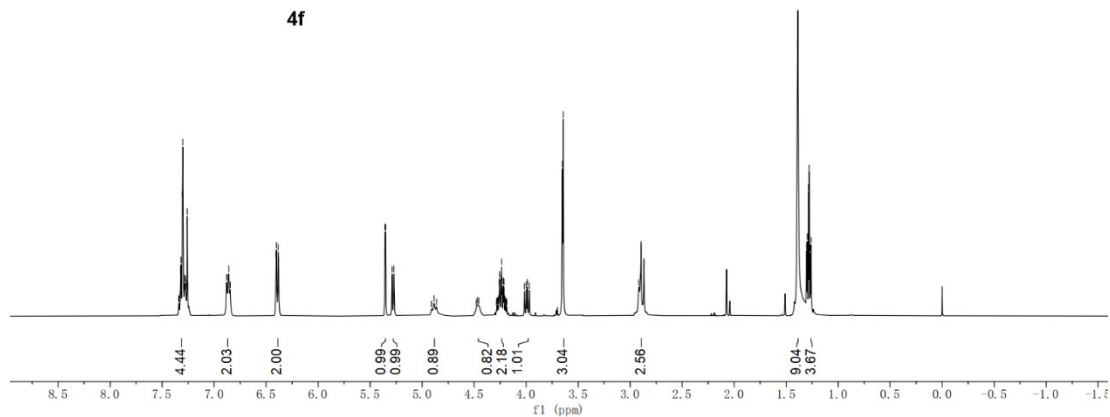

hys-0825-n5-p.15.fid

172.4908  
171.5293

143.2951  
142.1399

130.1423  
128.5885  
127.5689  
126.2836  
126.2744  
124.9102

113.5982

79.8429

65.8214  
63.4886  
61.6954

64.4340  
62.1164  
62.0997

39.1406  
37.2804

28.3016

14.1439

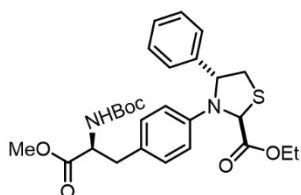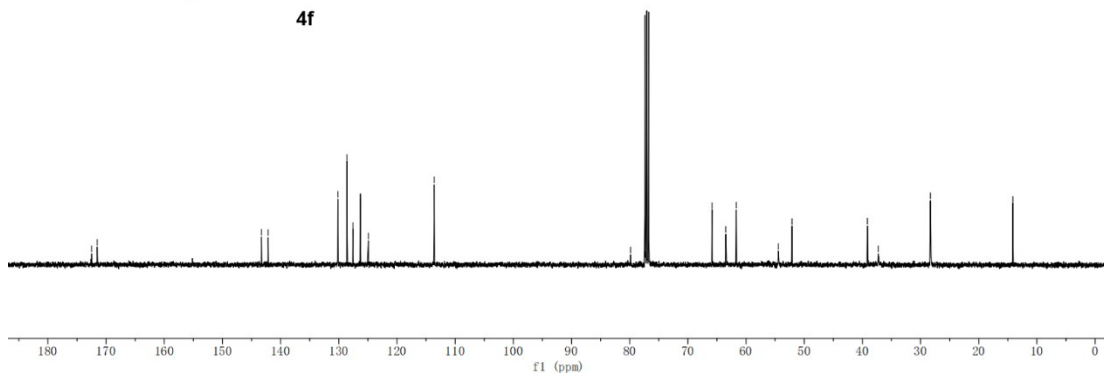

7.2992  
7.2957  
7.2914  
7.2884  
7.2805  
7.2778  
7.2747  
7.2674  
7.2600 CDCl<sub>3</sub>  
7.2387  
7.2258  
7.2215  
7.2190  
7.2038  
7.1667  
7.1580  
7.1526  
7.1408  
7.1355  
7.1268  
6.3218  
6.3131  
6.3077  
6.2959  
6.2905  
5.2836  
5.2818  
5.2284  
5.2107  
4.2568  
4.2390  
4.2299  
4.2211  
4.2121  
4.2058  
4.2030  
4.1941  
4.1881  
4.1791  
4.1764  
4.1703  
4.1612  
4.1527  
4.1435  
4.1257  
3.9697  
3.9518  
3.9414  
3.9235  
2.8643  
2.8618  
2.8361  
2.8335  
1.2590  
1.2412  
1.2234

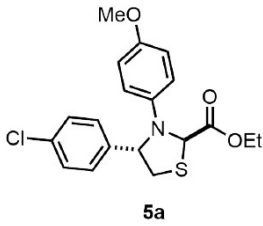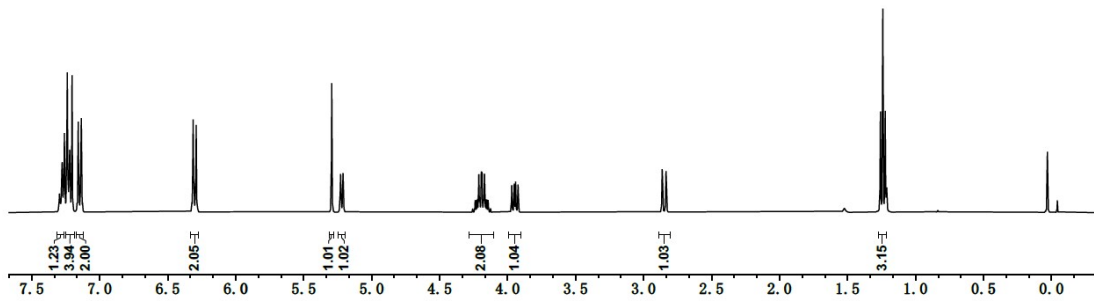

171.2703  
143.3978  
141.6739  
132.1303  
128.7945  
127.8425  
126.3426  
115.2360  
110.3282  
77.1600 CDCl<sub>3</sub>  
66.0079  
63.5493  
61.9587  
39.2106  
14.2681

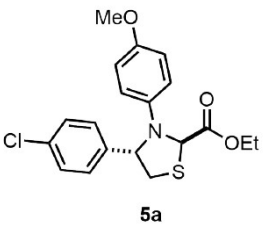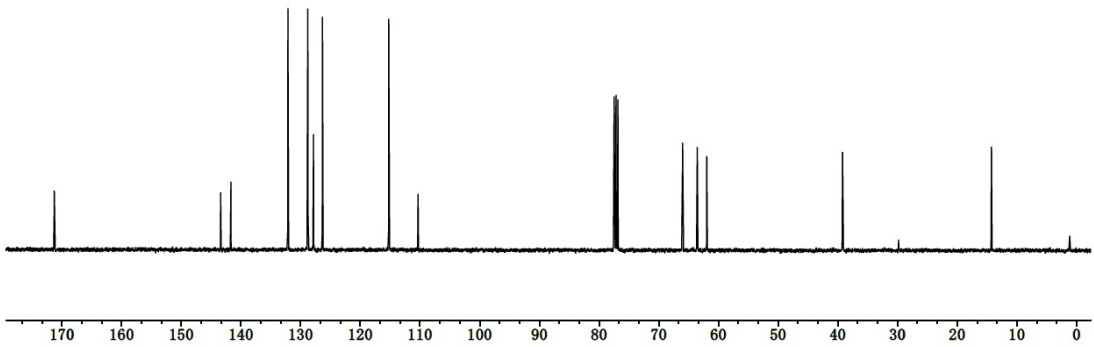

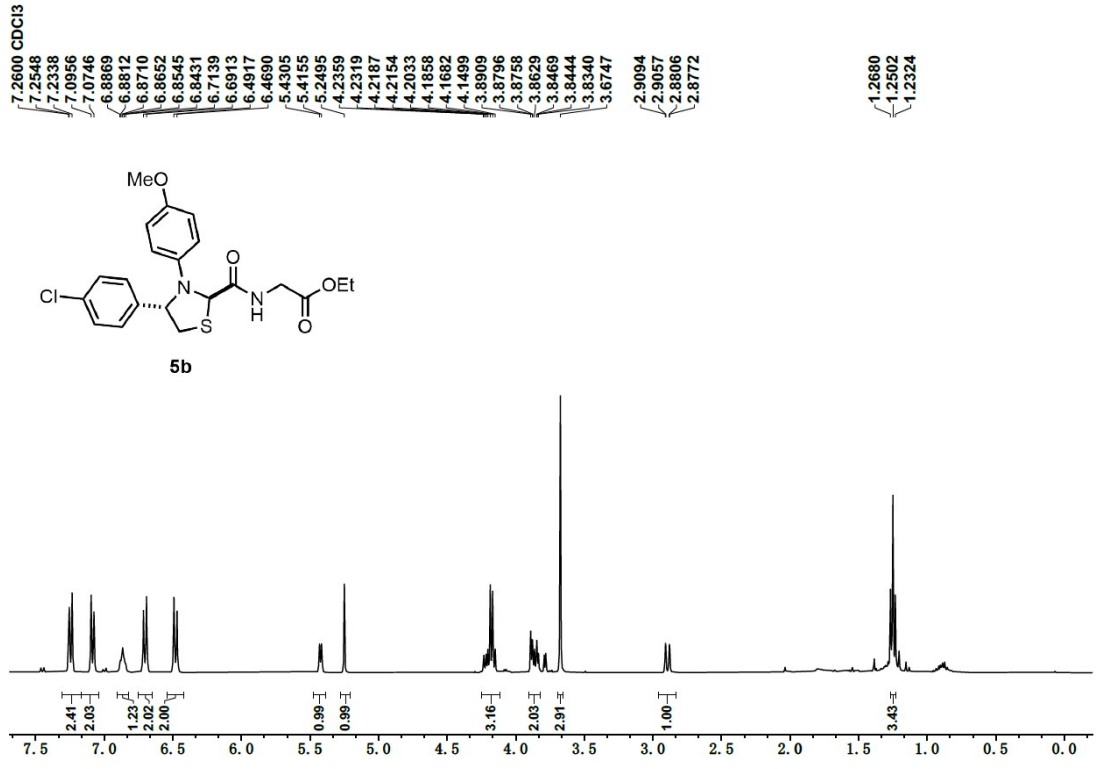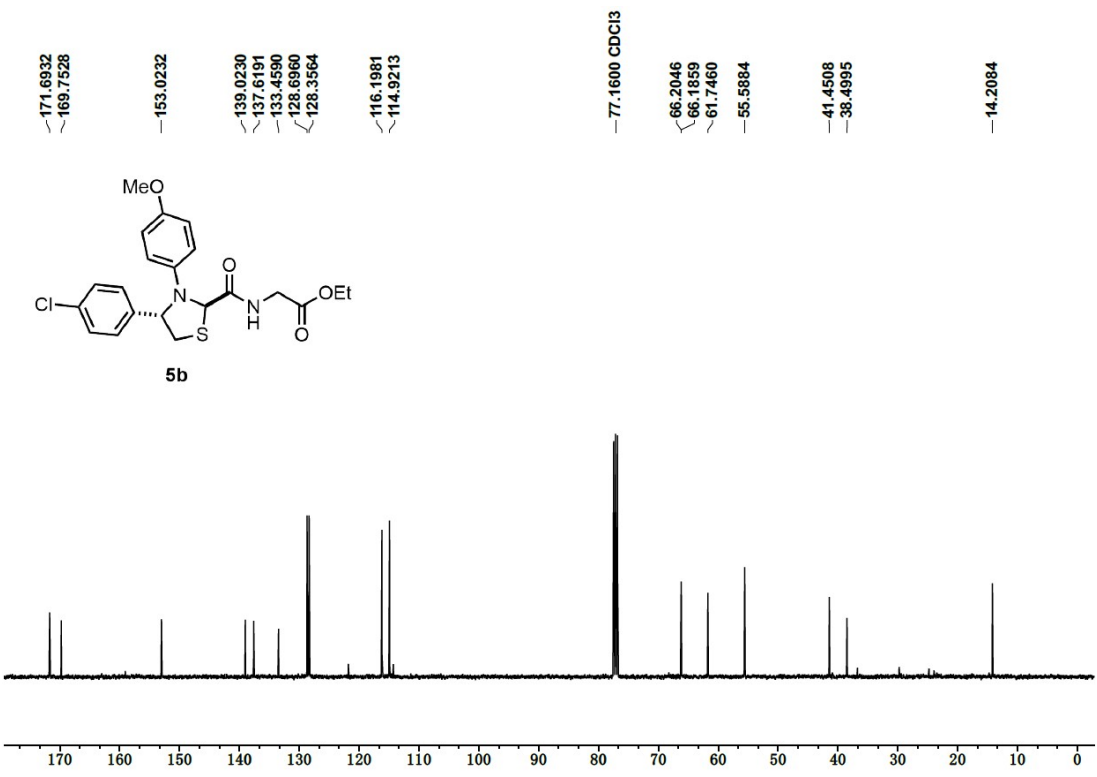



7.4189  
7.4123  
7.4077  
7.3959  
7.3912  
7.3848  
7.2600 CDCl3  
7.0439  
7.0369  
7.0318  
7.0206  
7.0169  
7.0090  
6.8242  
6.8135  
6.8075  
6.7970  
6.7285  
6.7187  
6.7129  
6.7019  
6.6961  
6.6868  
6.4981  
6.4886  
6.4826  
6.4715  
6.4658  
6.4560  
5.4218  
5.4070  
5.2415  
4.2491  
4.2325  
4.2070  
4.2030  
4.1890  
4.1715  
4.1536  
3.8904  
3.8876  
3.8765  
3.8619  
3.8467  
3.8417  
3.8310  
3.6826  
2.9121  
2.9085  
2.8834  
2.8799  
1.2720  
1.2541  
1.2362

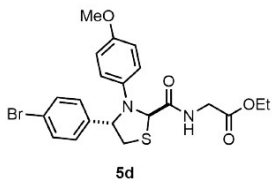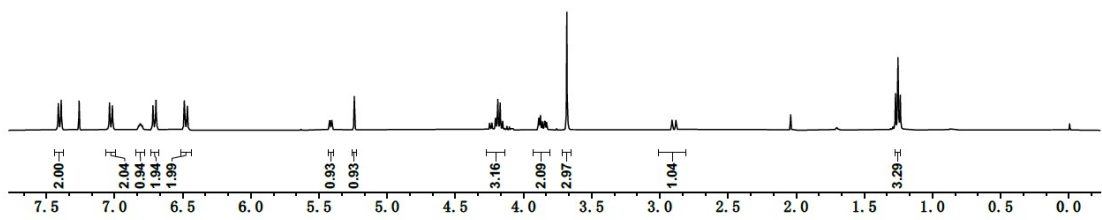

171.5973  
169.7368

153.0232

139.5060  
137.5498  
131.6525  
128.7054

121.6156  
116.1580  
114.9213

-77.1600 CDCl3

66.2405  
66.1932  
61.7715  
55.5992

41.4443  
38.4430

14.2283

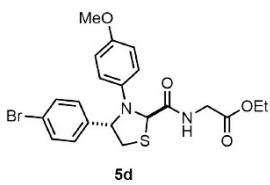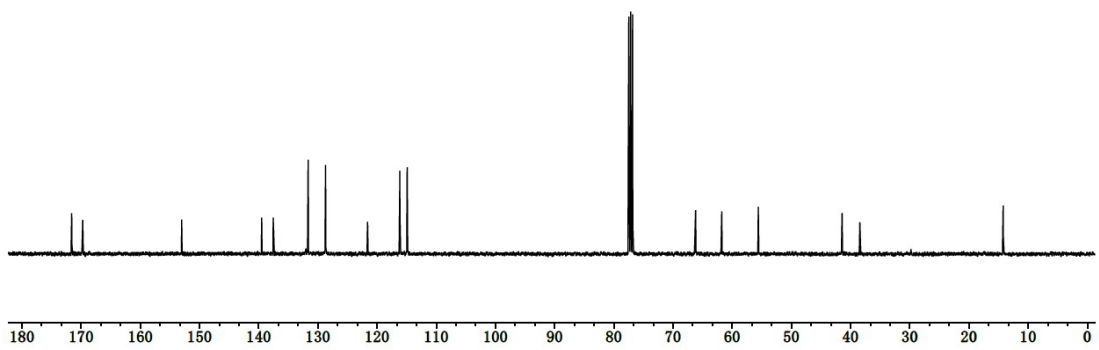

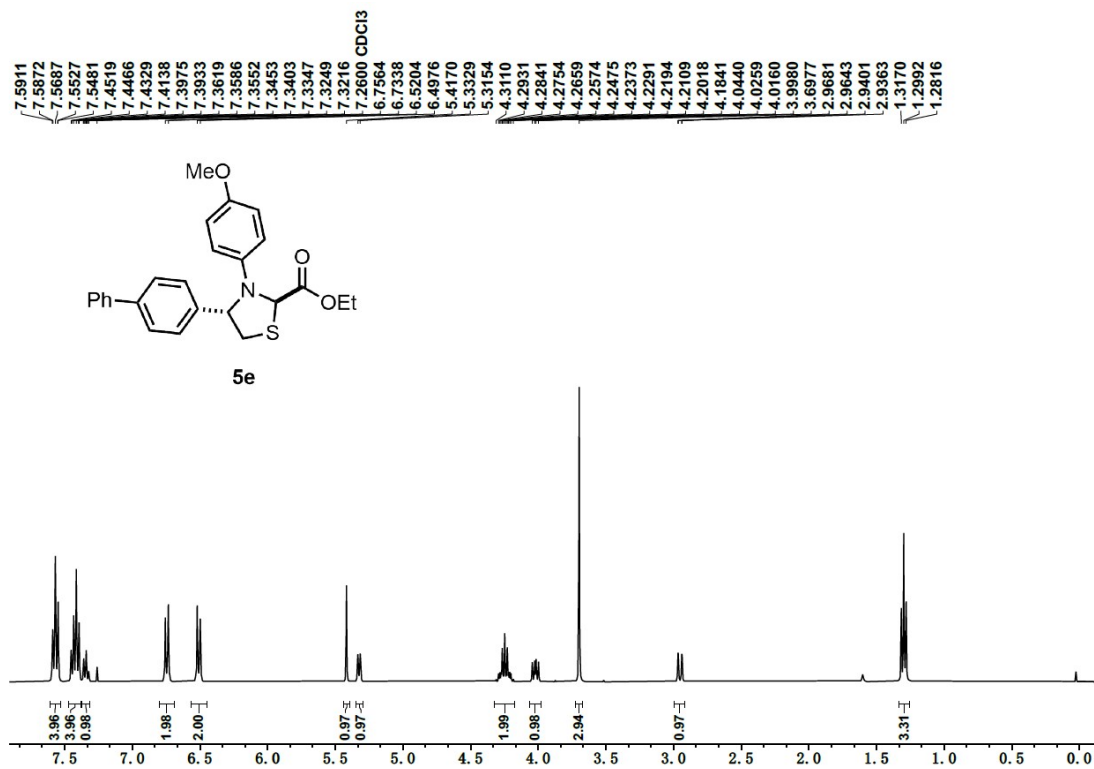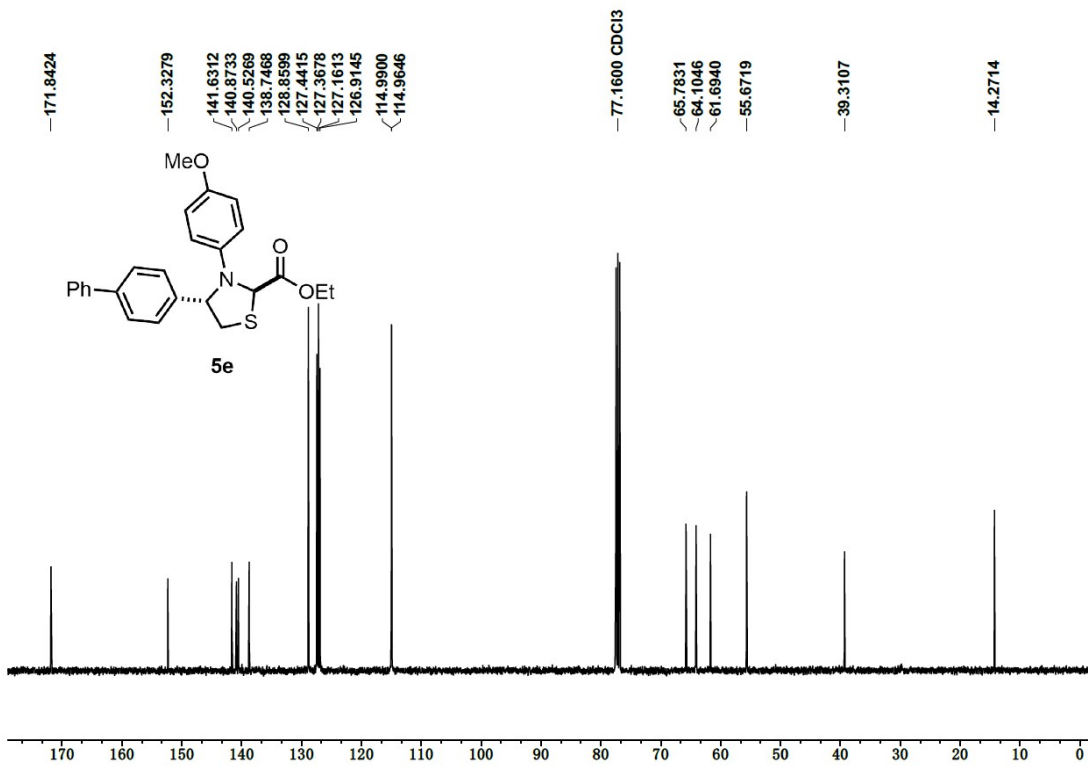

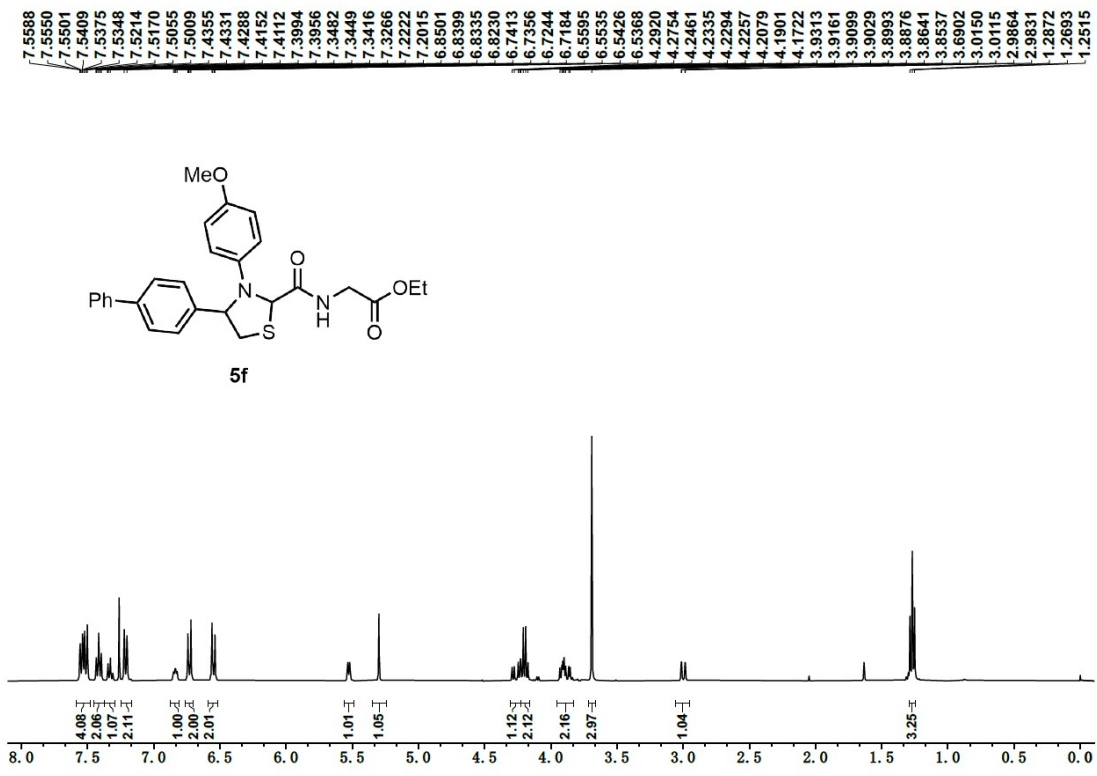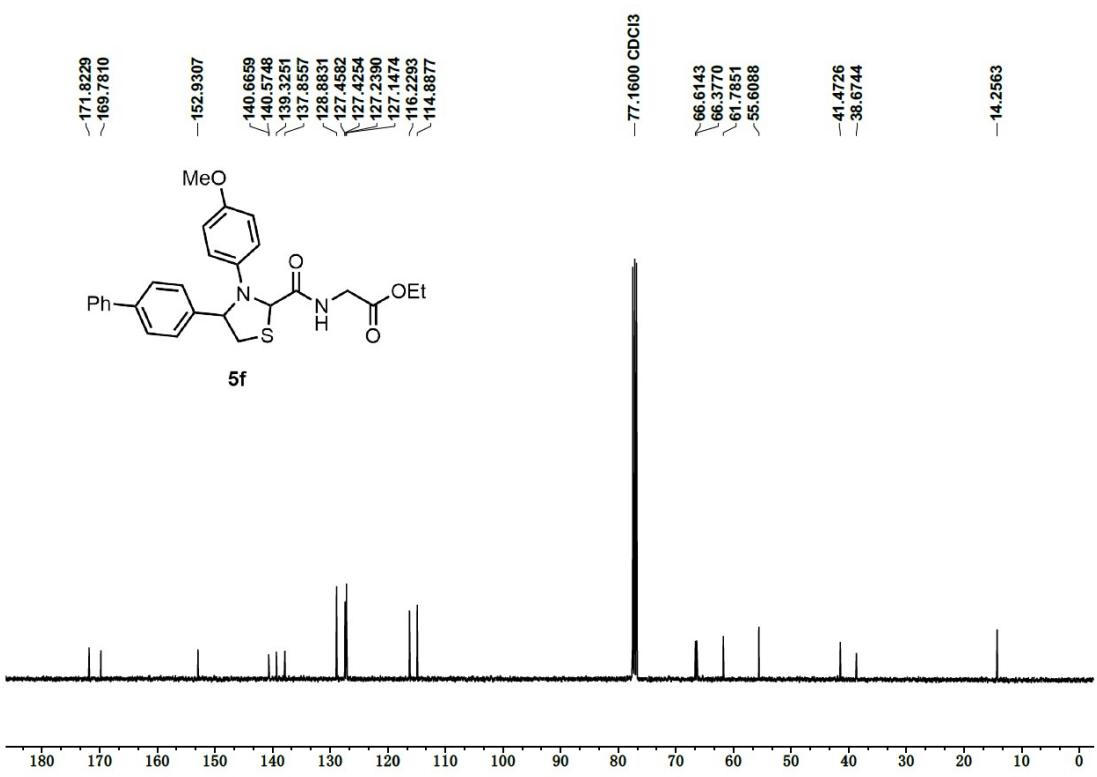

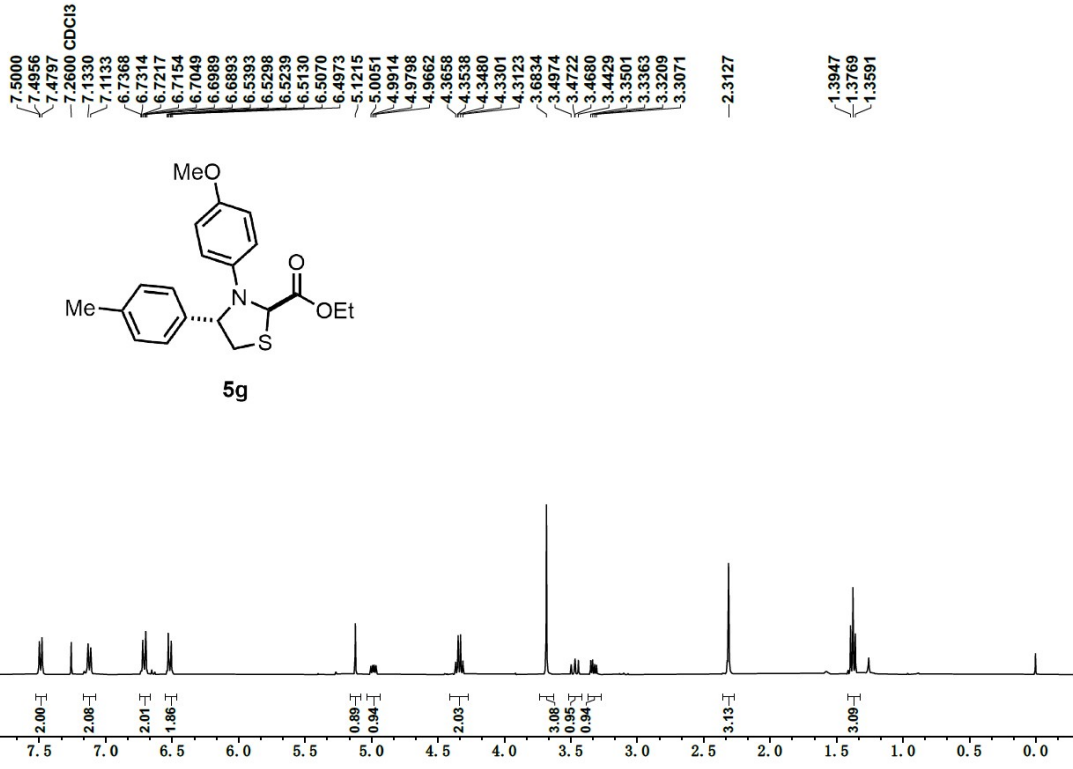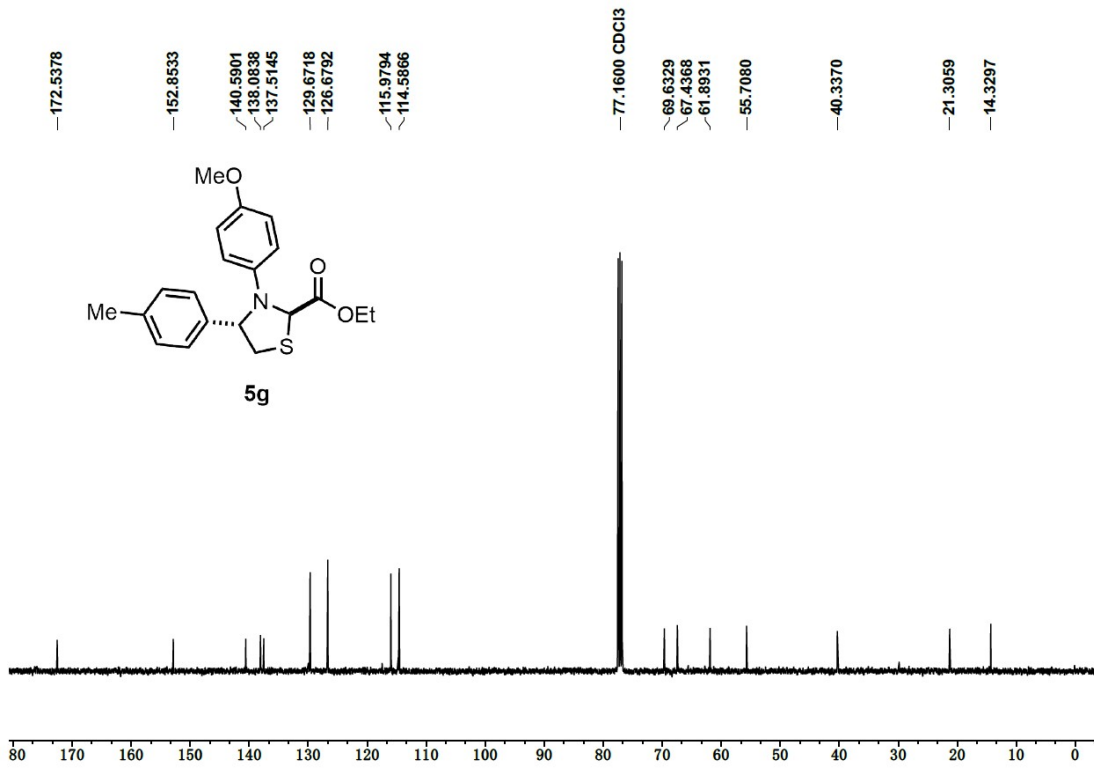



7.2600 CDCl3

7.0933  
7.0734  
7.0326  
7.0271  
7.0165  
7.0123  
6.8891  
6.8790  
6.8679  
6.8621  
6.8515  
6.7227  
6.7128  
6.7070  
6.6959  
6.6902  
6.6806  
6.5344  
6.5246  
6.5187  
6.5076  
6.5020  
6.4921  
5.4504  
5.4470  
5.4353  
5.4317  
5.2498  
4.2605  
4.2498  
4.2426  
4.2332  
4.2248  
4.2092  
4.2040  
4.1914  
4.1874  
4.1736  
4.1557  
3.8915  
3.8809  
3.8730  
3.8579  
3.8453  
3.8349  
3.8295  
3.6757  
2.9382  
2.9344  
2.9098  
2.9059  
2.2952  
1.2734  
1.2555  
1.2376

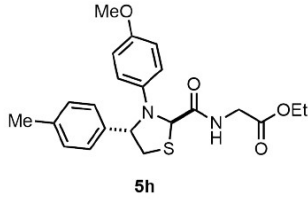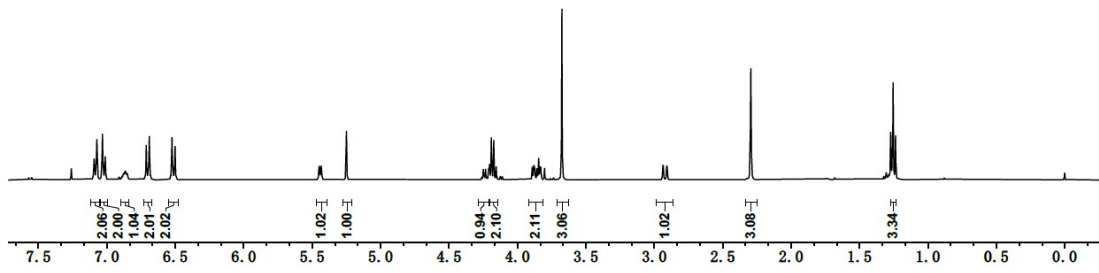

171.9214  
169.7276

152.8849

138.0032  
137.3504  
137.2867

129.1746  
126.8637

116.2736  
114.8320

77.1600 CDCl3

66.6956

66.3801

61.6800

55.5781

41.4508

38.7186

21.1914

14.2139

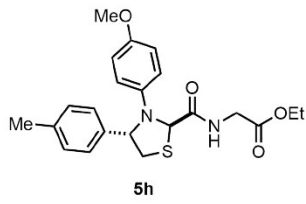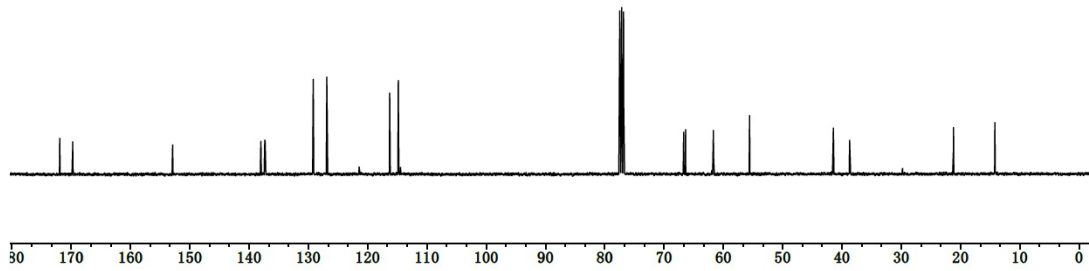

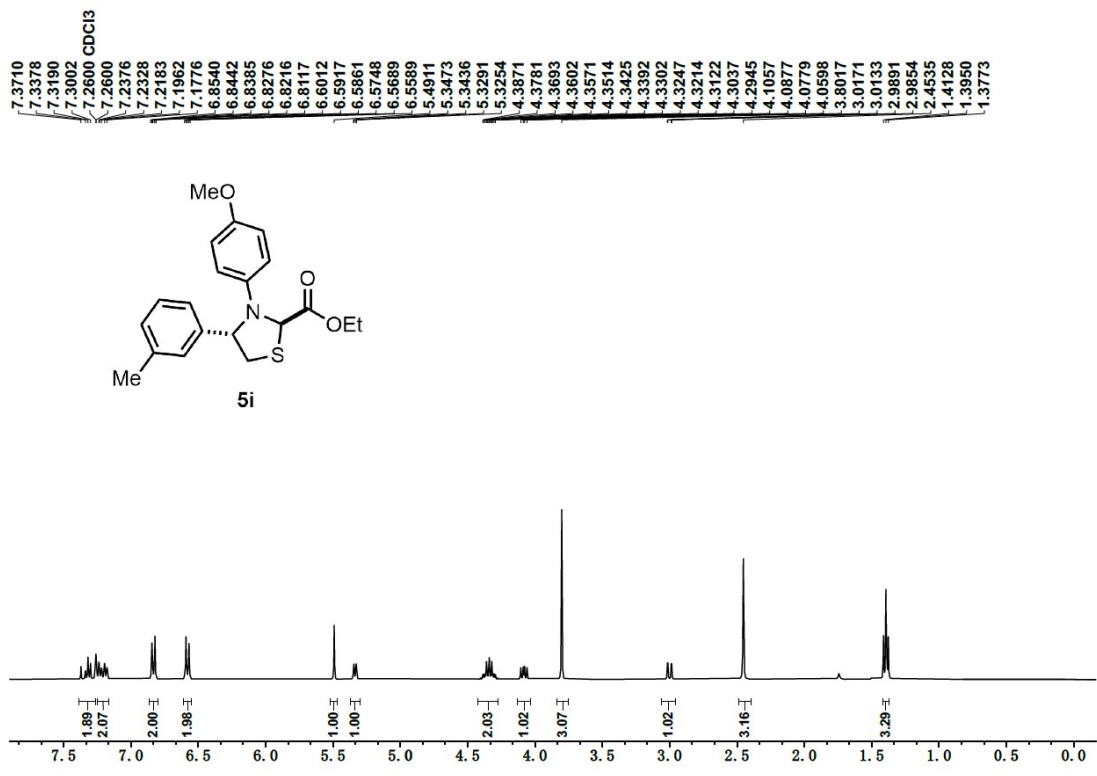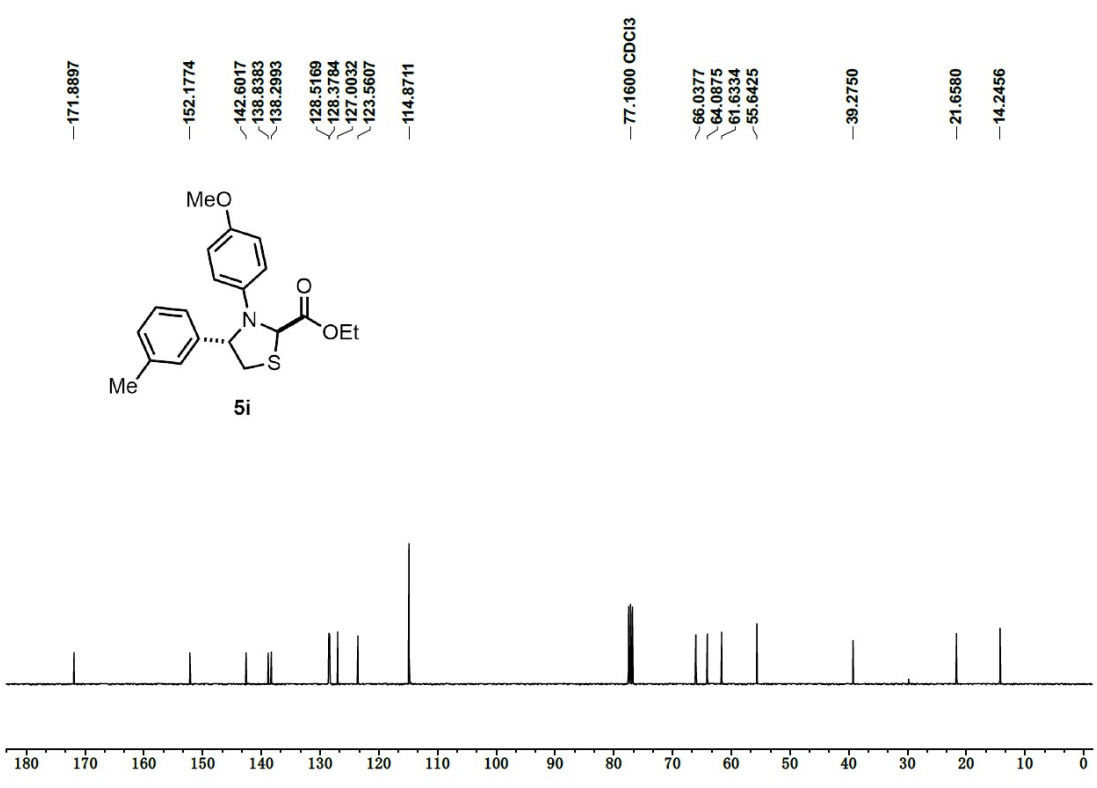

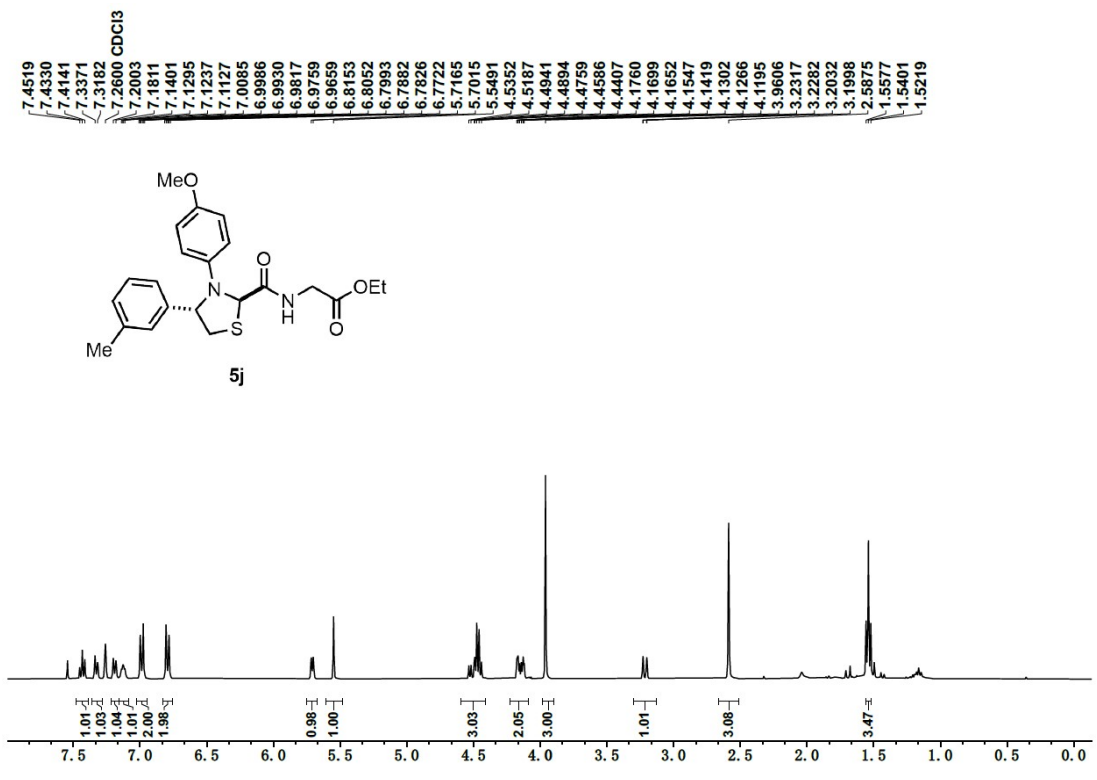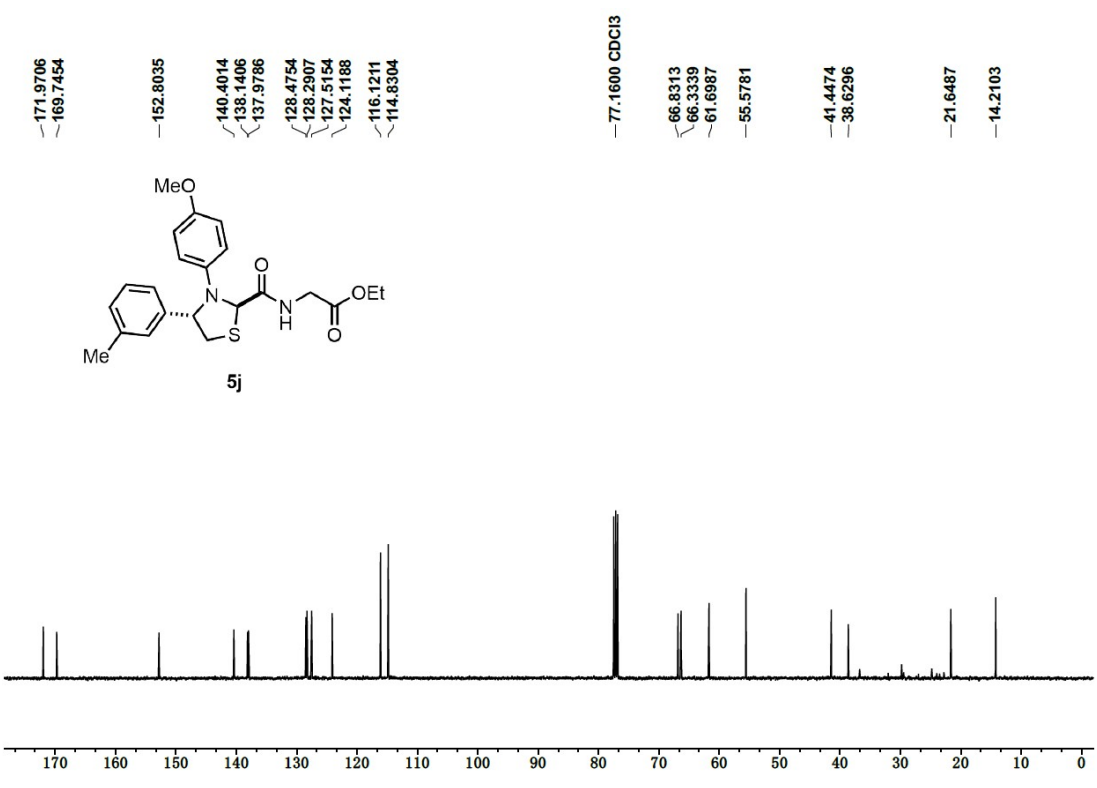

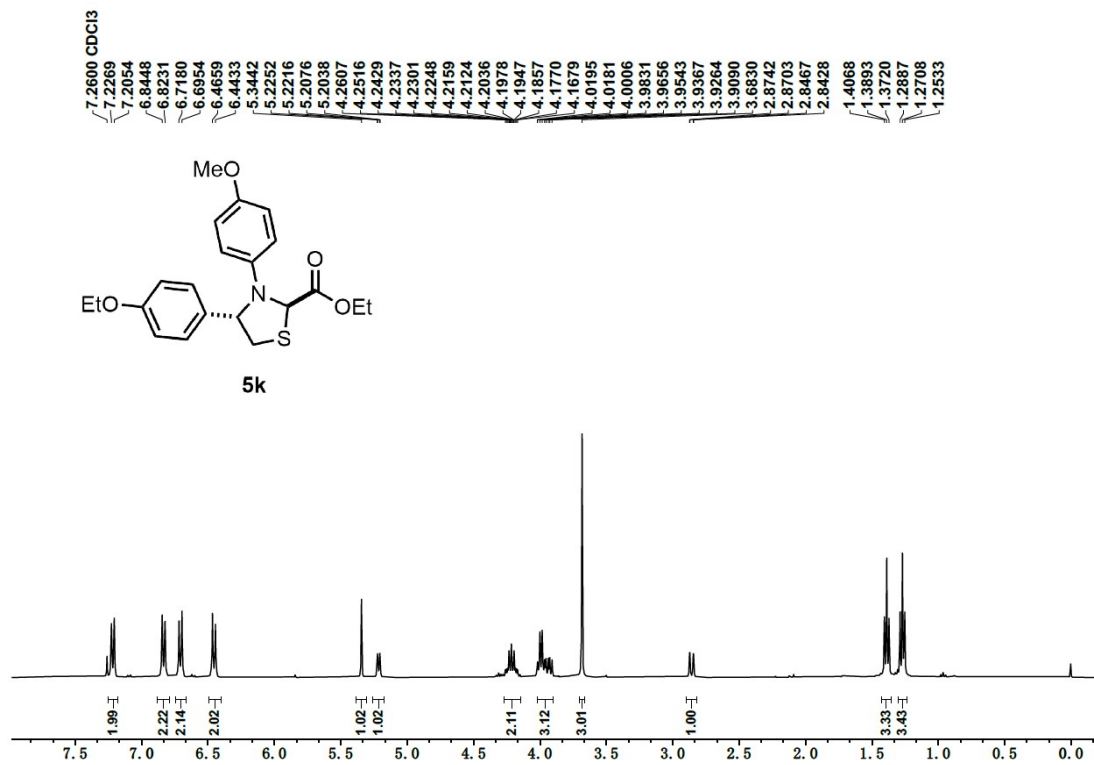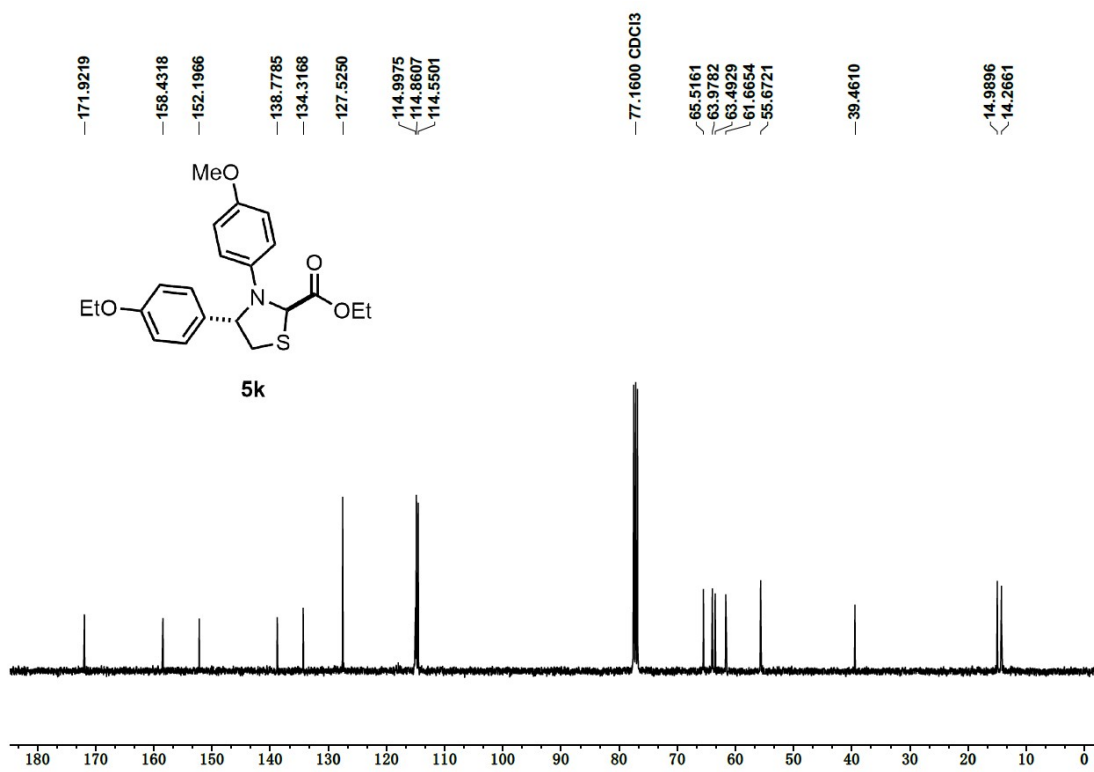

7.2614  
7.2545  
7.2433  
7.2398  
7.2358  
7.2325  
7.2215  
7.2142  
7.2105  
6.9388  
6.9233  
6.9203  
6.9175  
6.9019  
6.8845  
6.8813  
6.8658  
6.8622  
6.8597  
6.8568  
6.8534  
6.8372  
6.8343  
6.8317  
6.8087  
6.7921  
6.7860  
6.7808  
6.7583  
6.7289  
6.7061  
6.6782  
6.6554  
5.1126  
4.1866  
4.1763  
4.1687  
4.1585  
4.1366  
4.1306  
4.1186  
4.0063  
3.9852  
3.9653  
3.9547  
3.9492  
3.9441  
3.9343  
3.9298  
3.9022  
3.8786  
3.7163  
3.6998  
1.2452  
1.2273  
1.2220  
1.2096  
1.2052  
1.1875  
1.1697

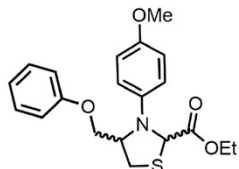

5i

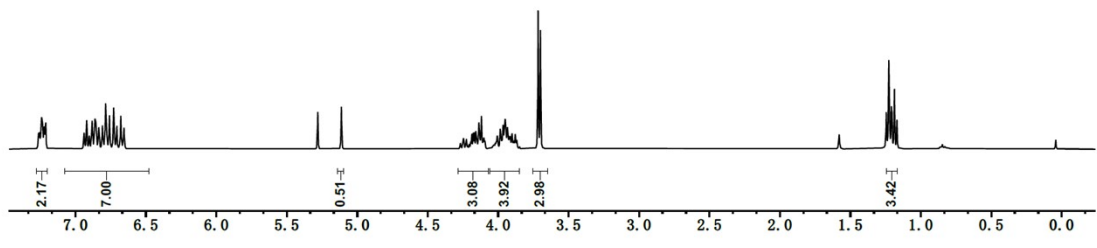

-171.8363  
-158.4839  
-153.8980  
-141.1166  
-129.6546  
121.2629  
116.9237  
114.9083  
114.7016

-77.1600 CDCl3

70.1760  
65.3516  
61.7251  
55.7339  
53.7441

-45.9923

-14.1968

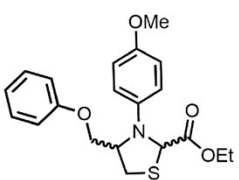

5i

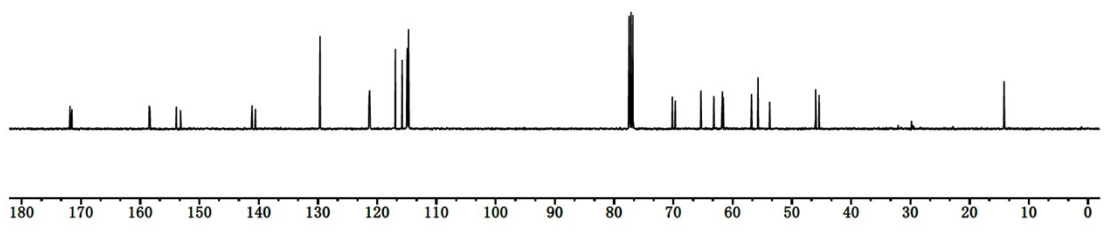

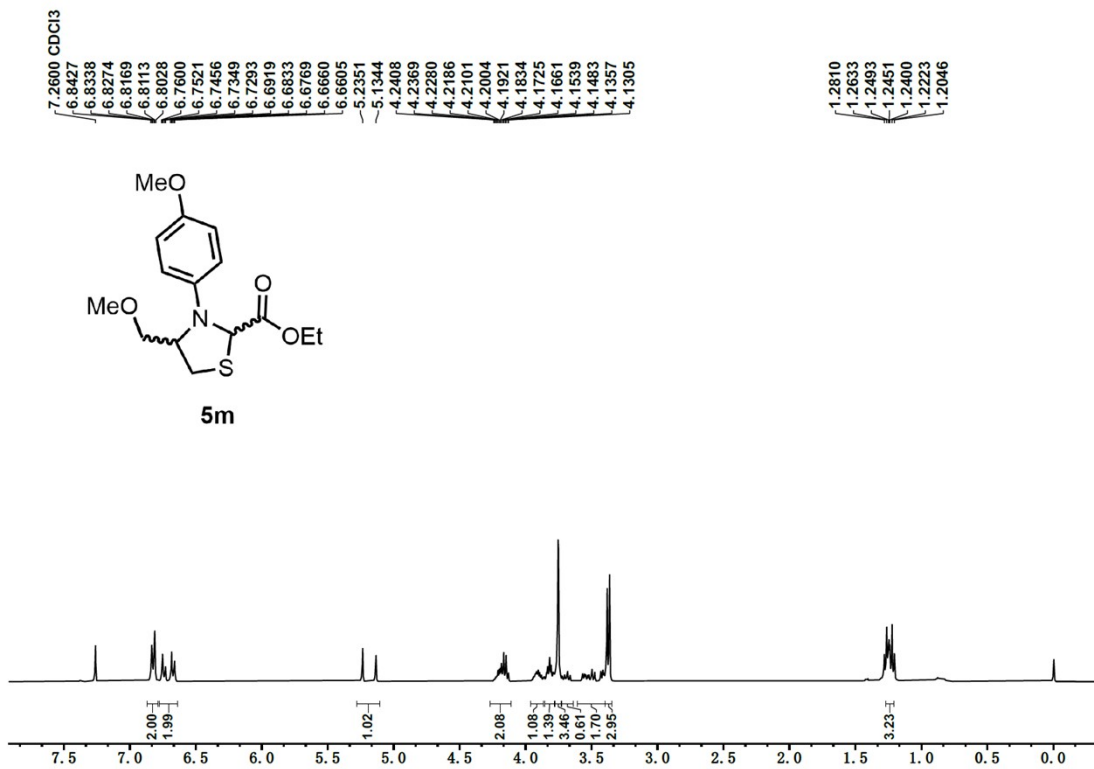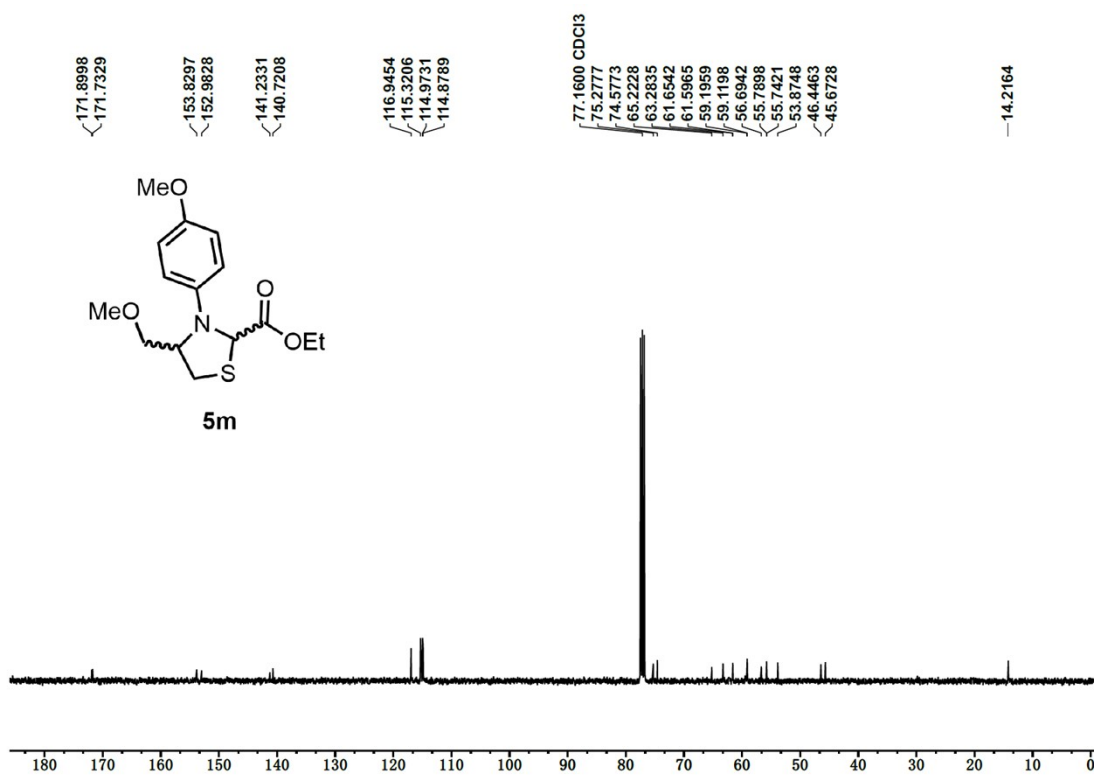

6.8759  
6.8557  
6.8442  
6.8282  
6.8211  
6.8149  
6.8034  
6.7970  
6.7965  
6.7558  
6.7500  
6.7335  
6.7260  
6.7211  
6.7103  
6.7040  
6.6928  
6.6878  
5.3107  
5.1285  
5.1021  
5.0981  
5.0794  
5.0751  
5.0625  
5.0582  
5.0543  
5.0505  
4.2207  
4.2104  
4.2028  
4.1921  
4.1854  
4.1774  
4.1680  
4.1512  
4.1031  
4.0824  
4.0775  
4.0310  
4.0157  
4.0114  
3.9992  
3.9787  
3.9673  
3.9624  
3.8518  
3.8425  
3.7579  
3.7451  
3.3413  
3.3369  
3.3245  
3.3203  
1.2807  
1.2631  
1.2451  
1.2373  
1.2194  
1.2017

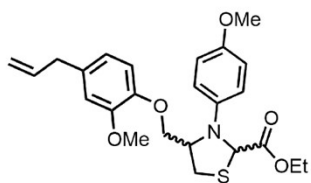

5n

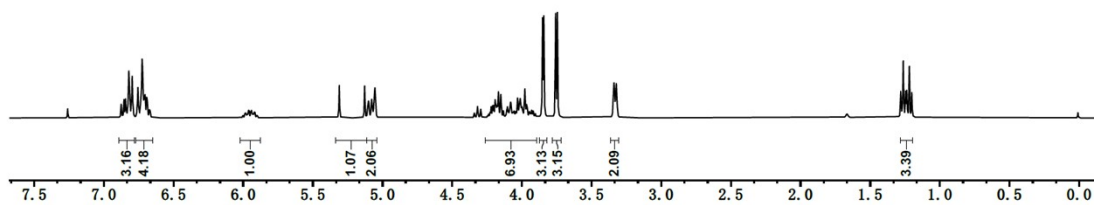

171.8650  
171.5313  
153.7796  
153.1231  
149.9061  
149.7833  
146.3527  
146.1959  
141.1590  
140.6429  
137.6541  
137.6077  
134.3031  
134.0727  
120.7326  
120.6802  
116.7964  
115.8381  
115.8046  
115.7847  
115.4180  
115.0761  
114.9222  
114.8790  
112.7391

77.1600 CDCl3  
72.0989  
71.7540  
65.2604  
63.0879  
61.6688  
61.5172  
56.8958  
56.0319  
55.9898  
55.7209  
53.7479  
45.9361  
45.3984  
39.9229

14.1811  
14.1628

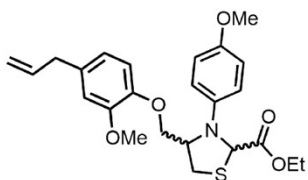

5n

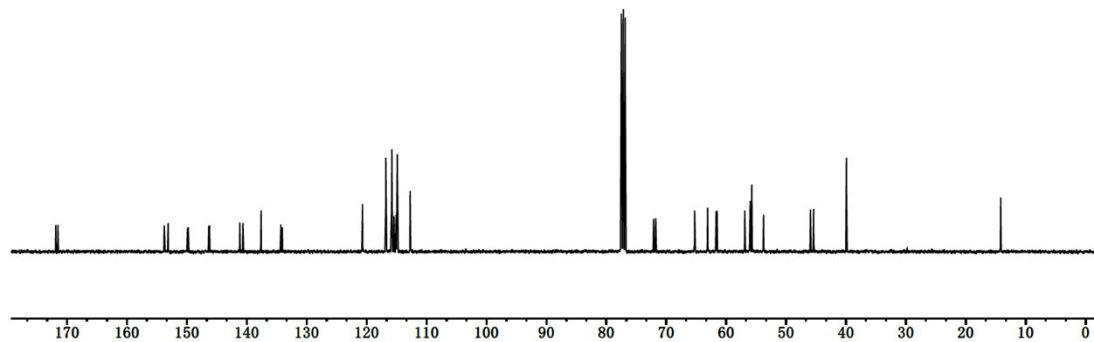

7.2600 CDC13  
 6.8501  
 6.8408  
 6.8350  
 6.8243  
 6.8182  
 6.8090  
 6.7328  
 6.7237  
 6.7176  
 6.7069  
 6.7010  
 6.6914  
 5.1302  
 4.2566  
 4.2388  
 4.2297  
 4.2196  
 4.2119  
 4.2014  
 4.1940  
 4.1836  
 4.1756  
 4.1659  
 4.1567  
 4.1390  
 3.8520  
 3.8378  
 3.8273  
 3.8216  
 3.8129  
 3.7985  
 3.7896  
 3.7839  
 3.7746  
 3.7536  
 3.3607  
 3.3448  
 3.3346  
 3.3289  
 3.3186  
 3.3027  
 3.0970  
 3.0824  
 3.0710  
 3.0680  
 3.0562  
 3.0417  
 1.2849  
 1.2671  
 1.2492

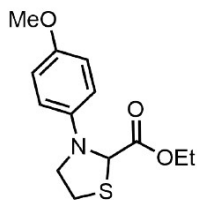

50

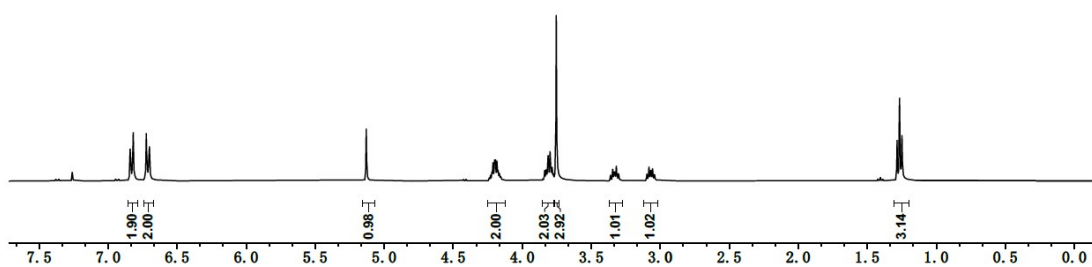

171.8208  
 153.4206  
 140.9995  
 116.0851  
 114.9185  
 77.1600 CDC13  
 64.9239  
 61.5972  
 55.7655  
 53.6931  
 30.5602  
 14.2214

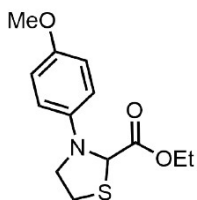

50

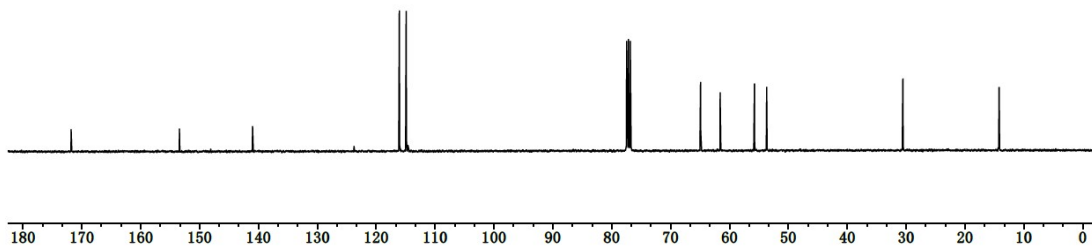



-7.2600 CDC13

6.8556  
6.8343  
6.8212  
6.7969  
4.9794  
4.2089  
4.1908  
4.1737  
4.1645  
4.1555  
4.1323  
4.1164  
3.9959  
3.9834  
3.9502  
3.9379  
3.8251  
3.8126  
3.8003  
3.7782  
3.7567  
3.6801  
3.6606  
3.6440  
3.6342  
3.6203  
3.2914  
3.2792  
3.2731  
3.2657  
3.2591  
3.2519  
3.2445  
3.2291  
3.0430  
3.0309  
3.0174  
3.0034  
2.9917

1.2763  
1.2582  
1.2400

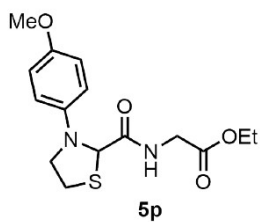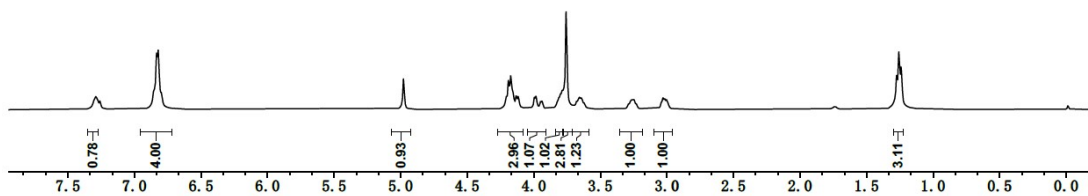

171.9719  
169.7352

154.4889

141.4564

117.3502  
114.8728

-77.1600 CDC13

69.1608

61.6693

55.7306  
55.6843

41.3649

30.6922

14.2280

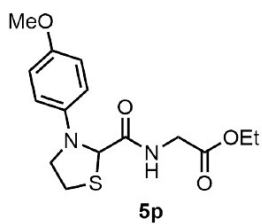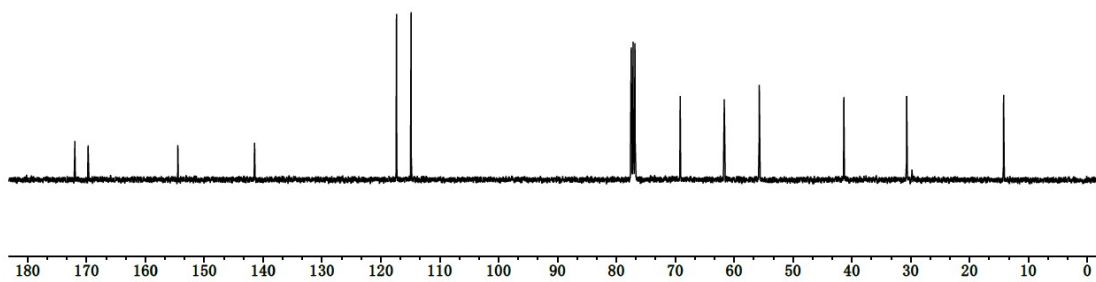

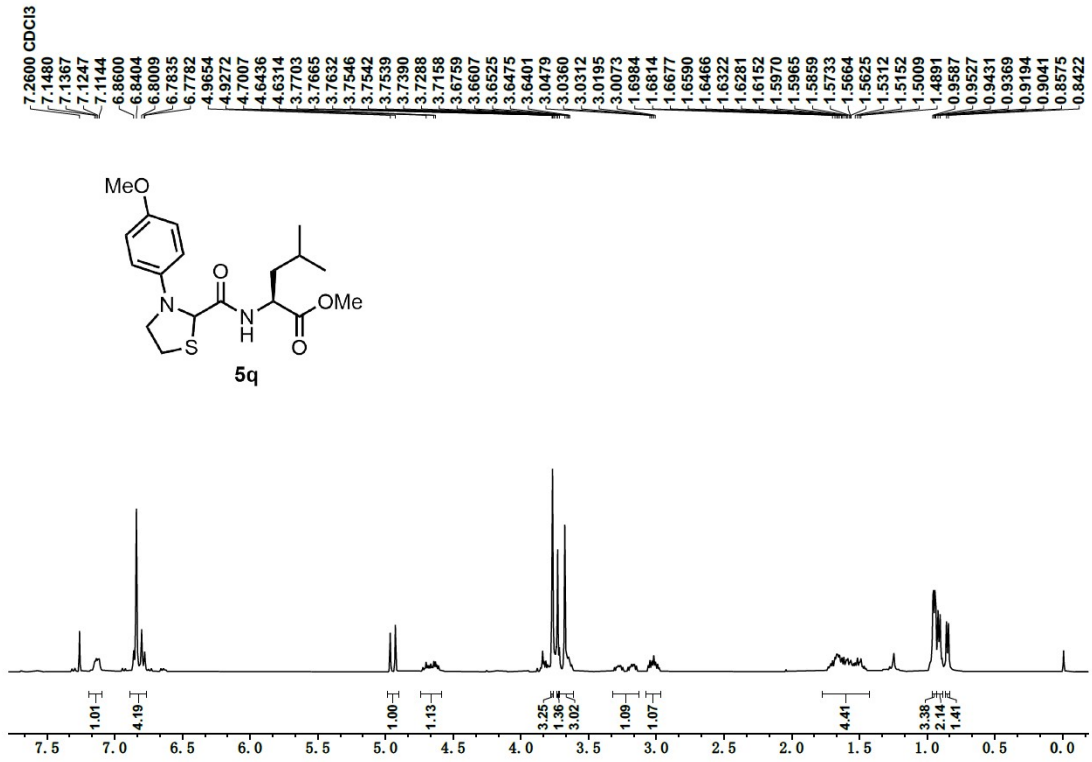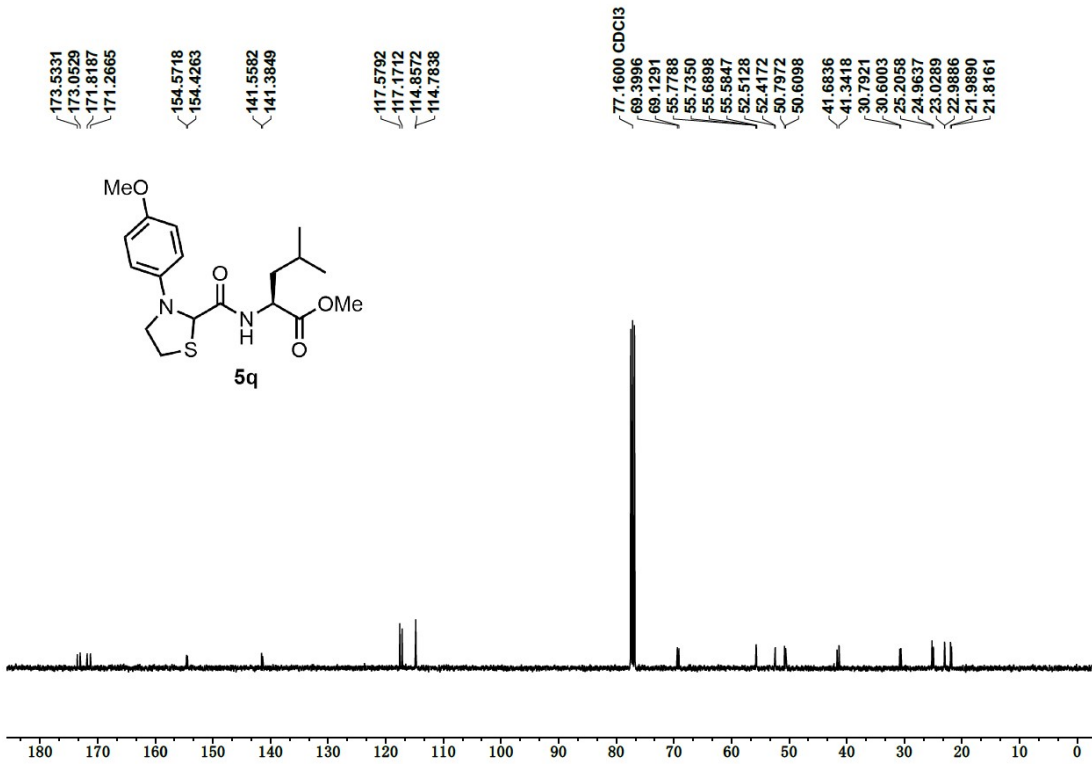

HYS-0827-2-J.14.fid

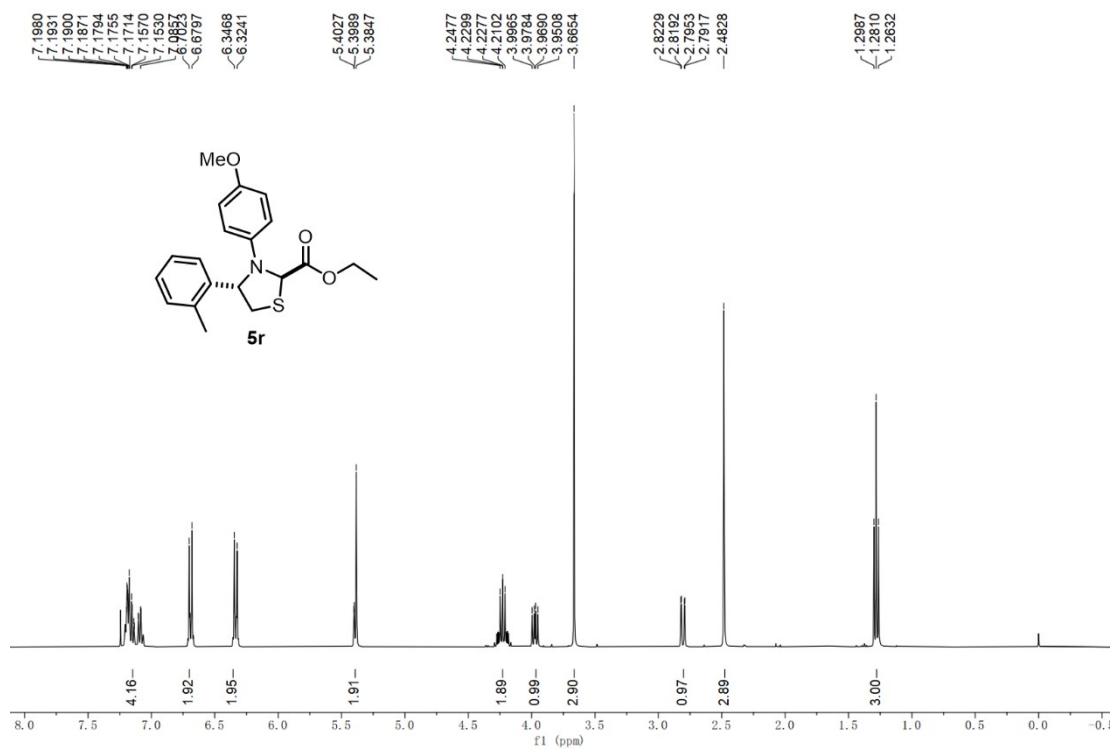

HYS-0827-2-J.15.fid

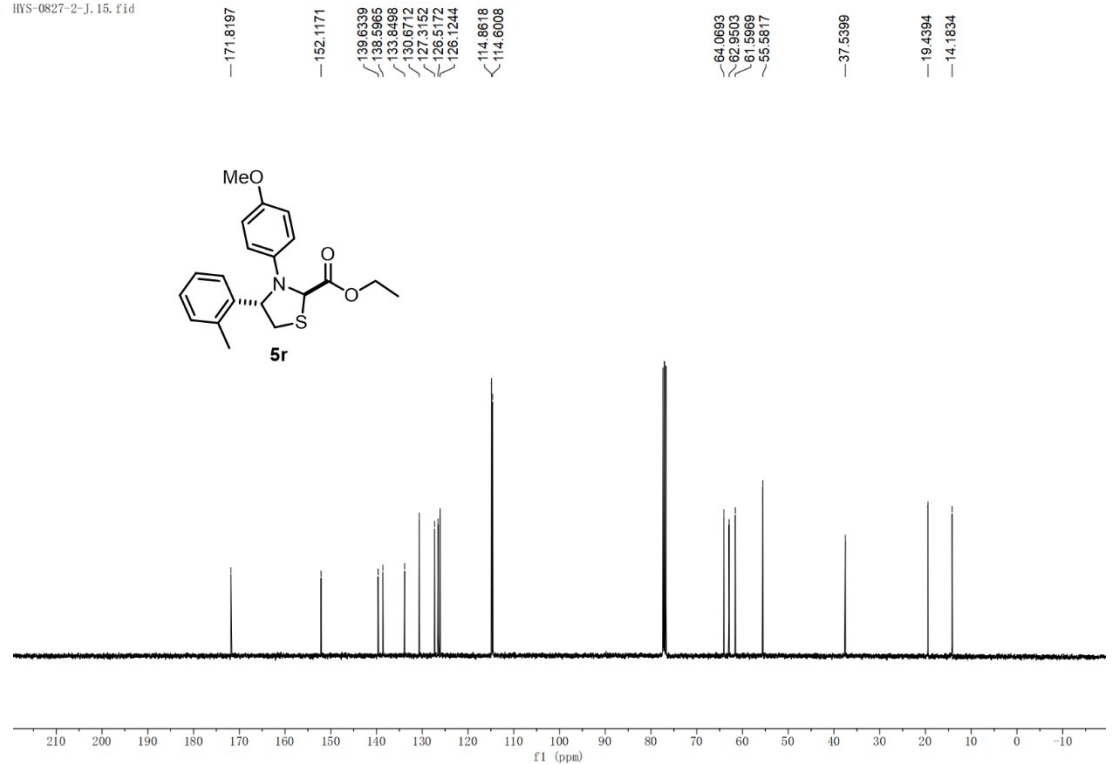

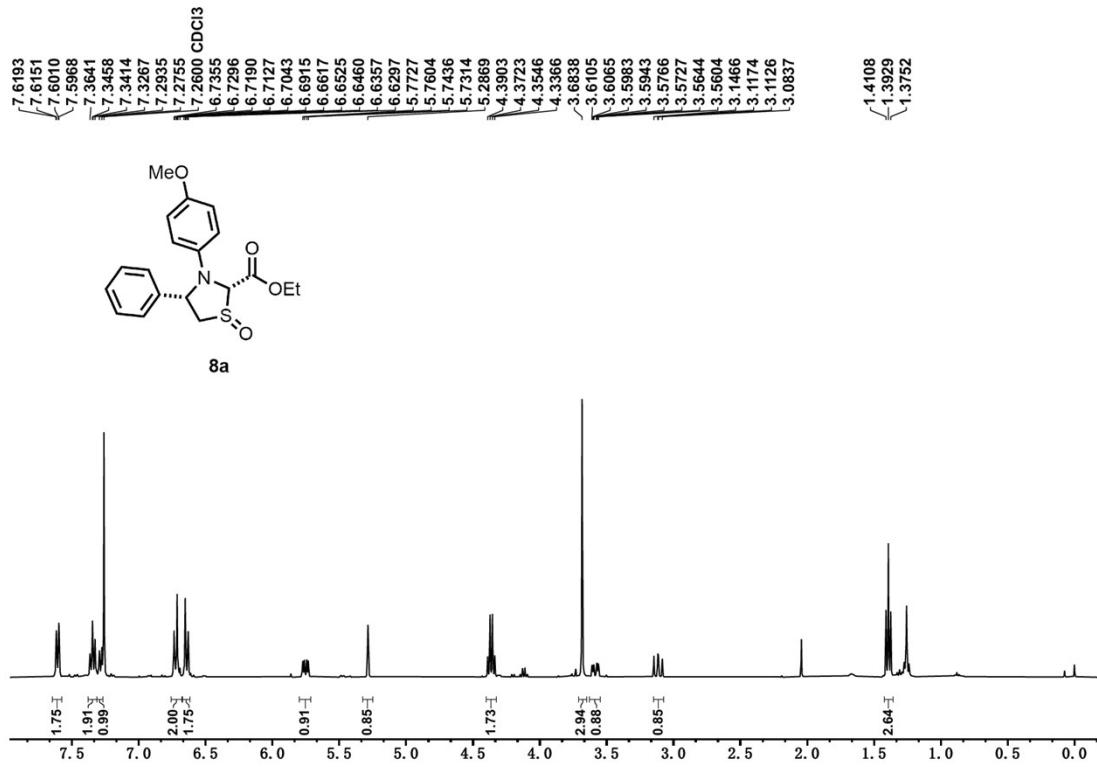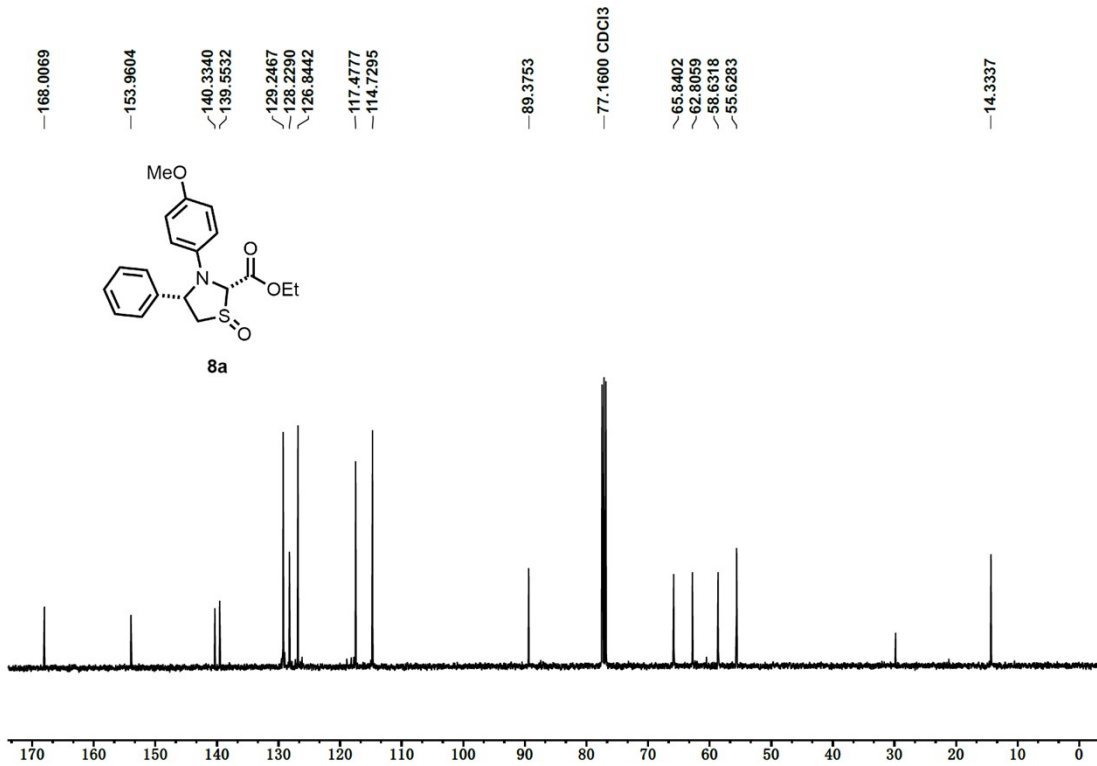

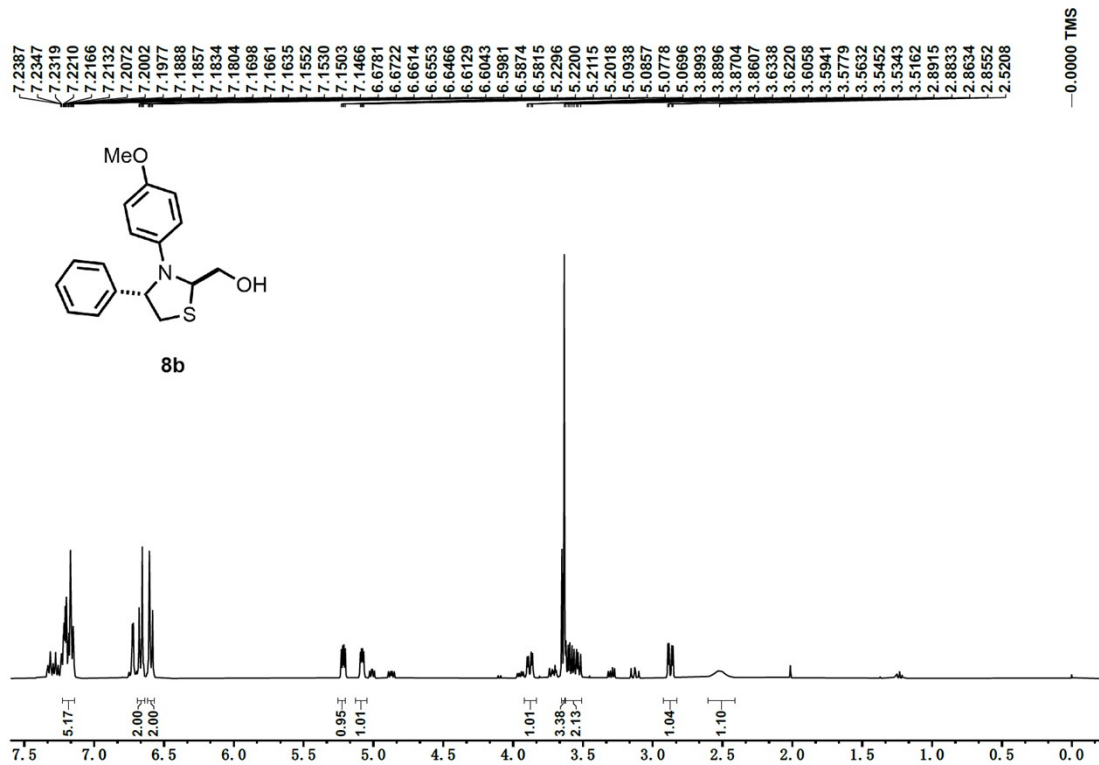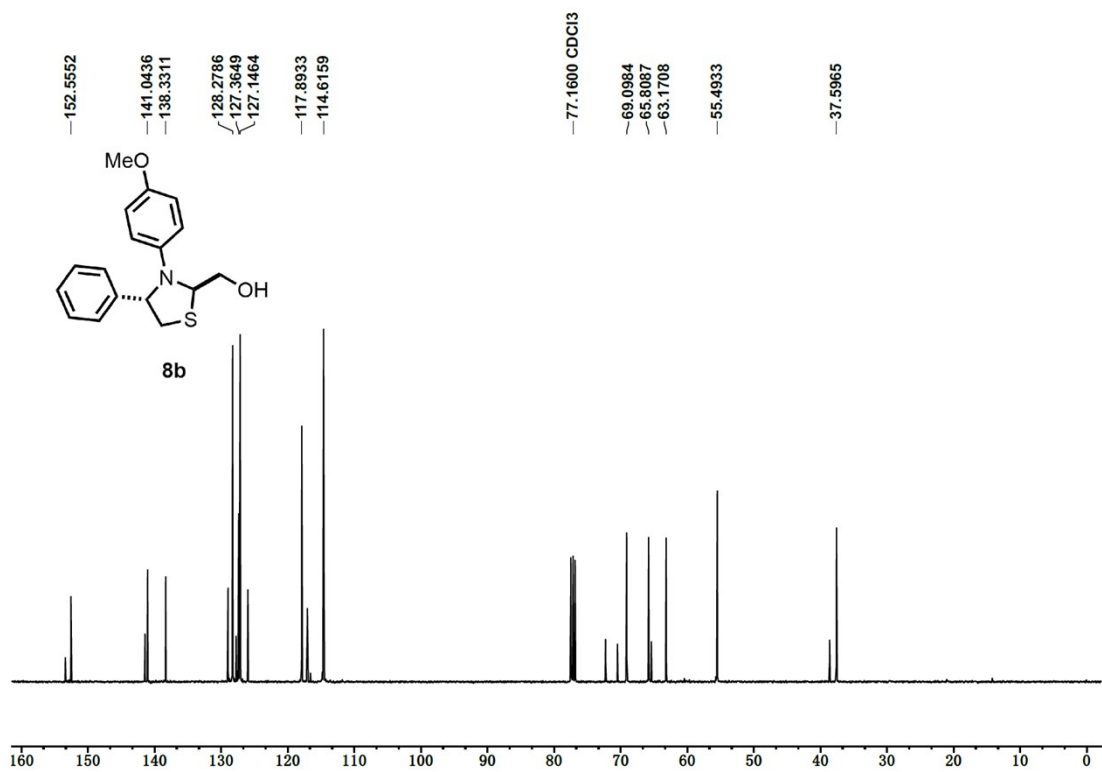

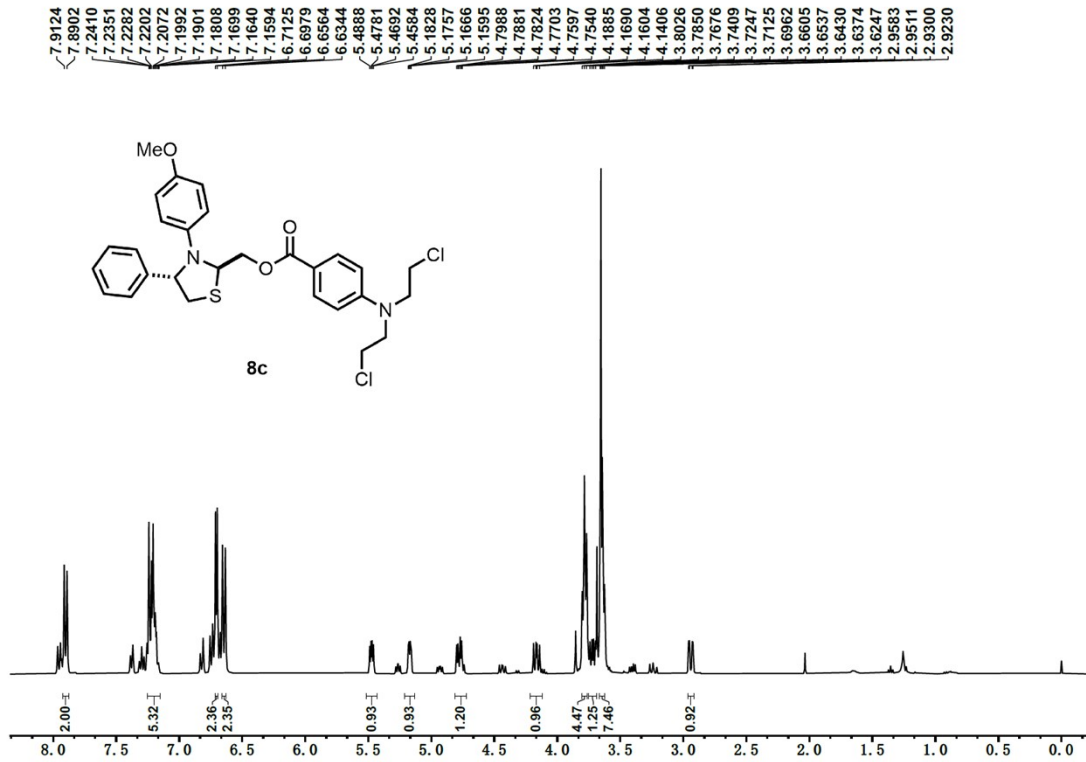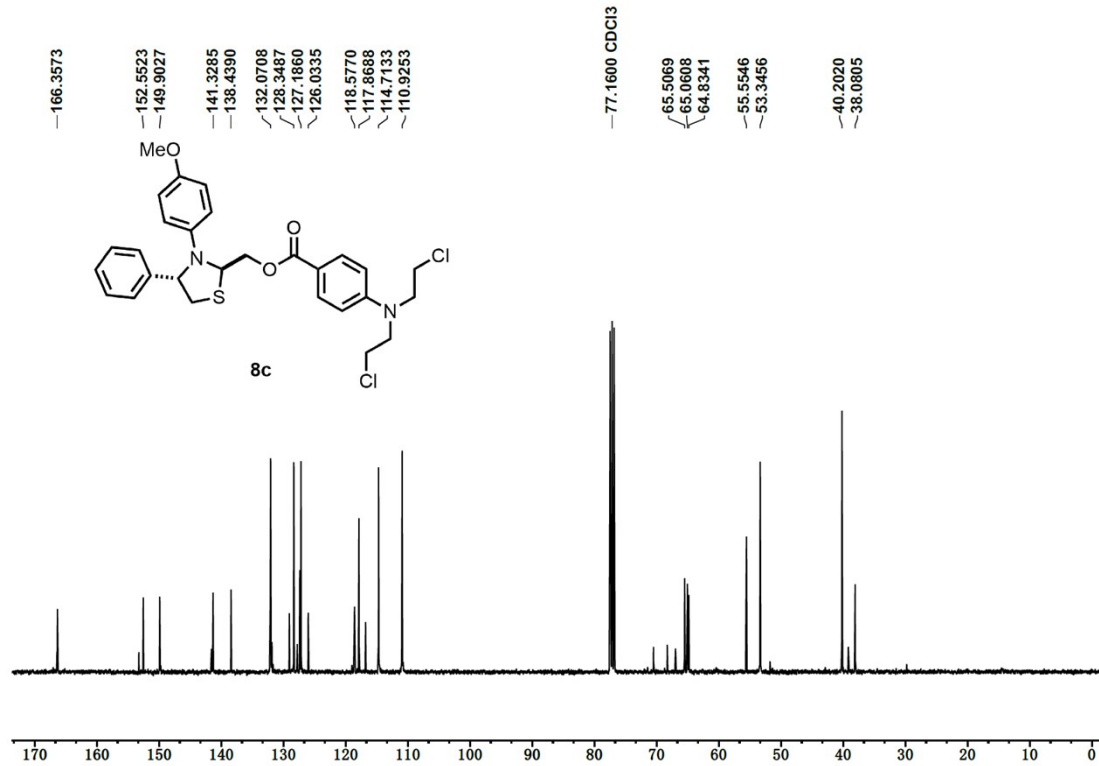

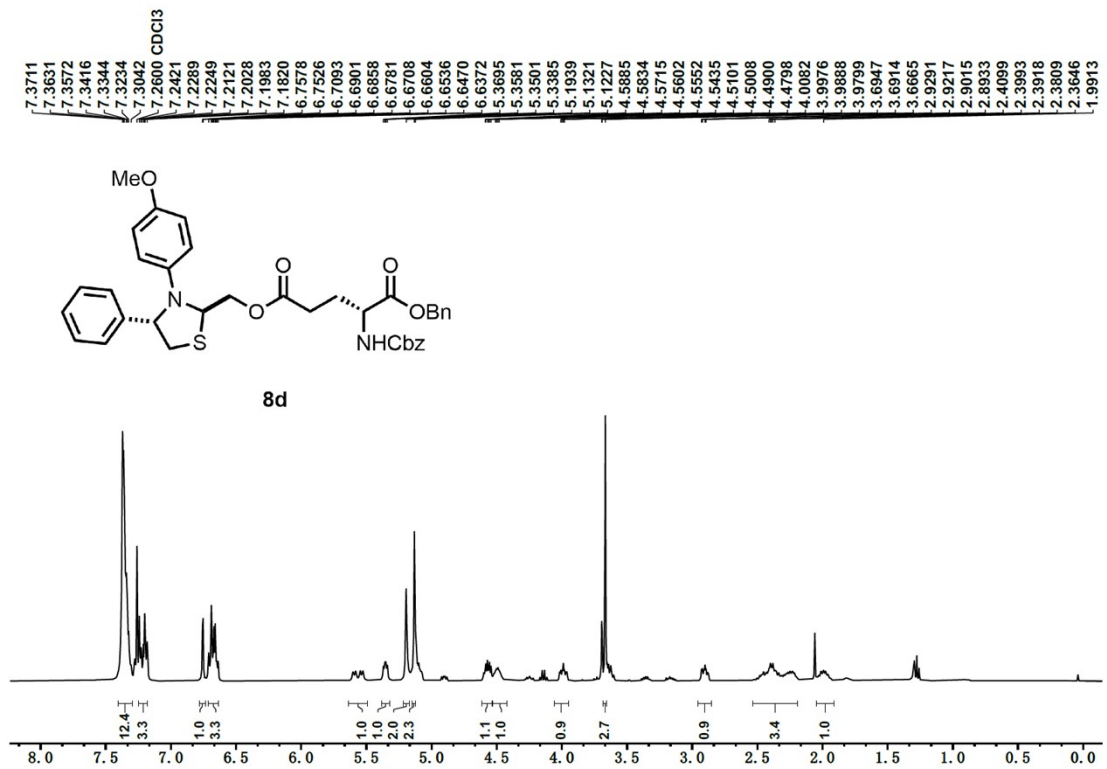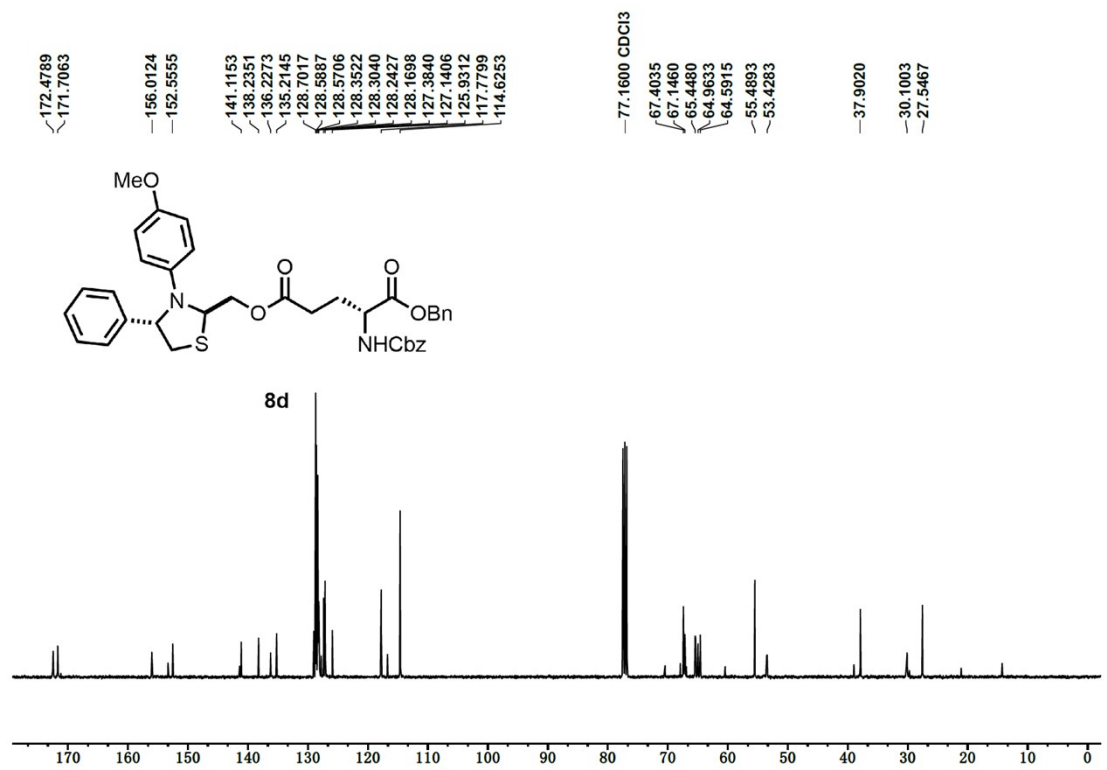

Supplement: d3cc04580c1.pdf [file d3cc04580c1.pdf]
